# Supplementary material for: Design, synthesis and evaluation of 2-phenylpyrimidine derivatives as novel antifungal agents targeting CYP51
Source: Royal Society of Chemistry journal article supplement (doi:10.1039/d3md00589e), 2023-11-21
Supplement: d3md00589e1.pdf [file d3md00589e1.pdf]

The  $^1\text{H}$ -NMR,  $^{13}\text{C}$  NMR and MS spectrum of compound **A1**

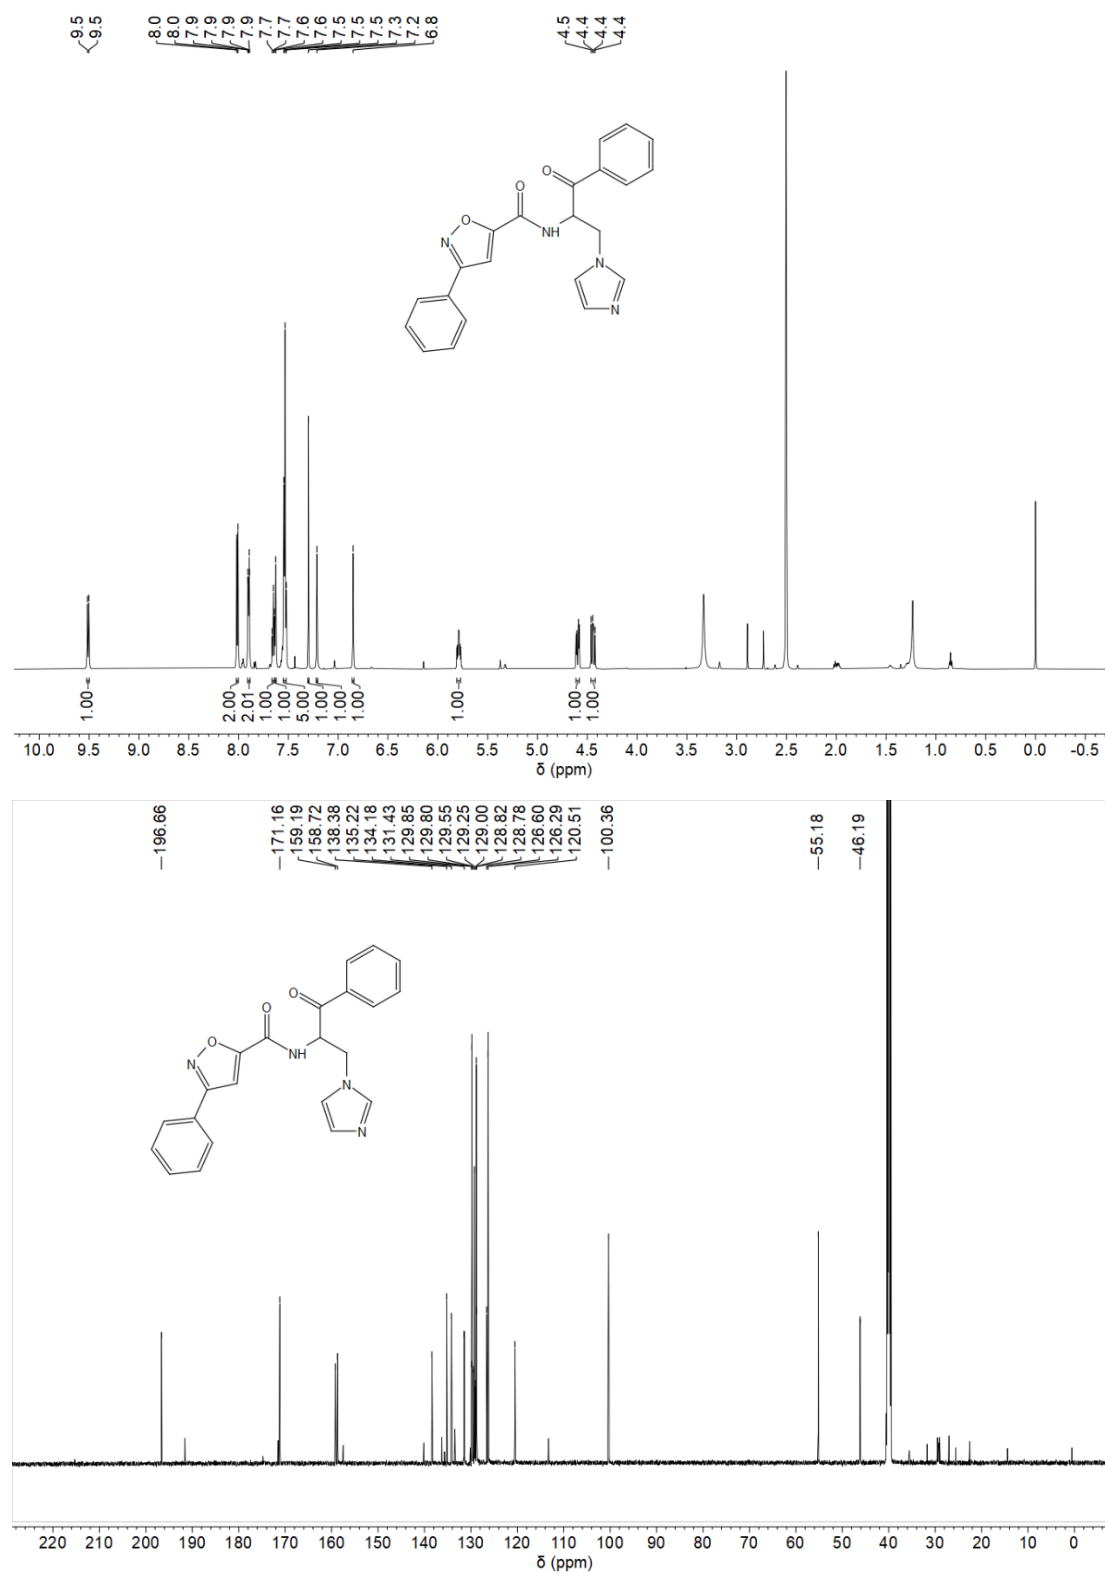

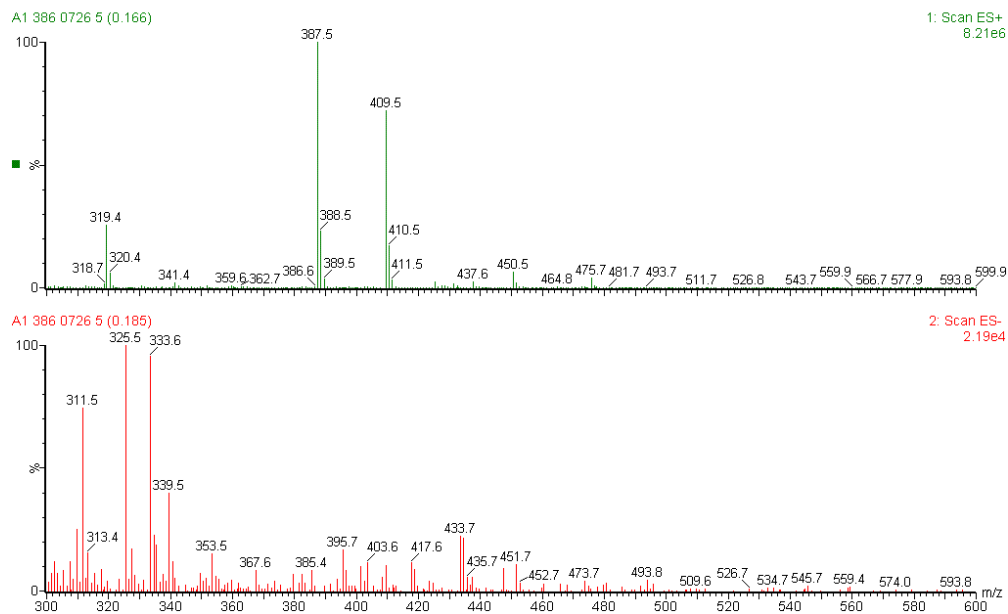

The  $^1\text{H}$ -NMR and MS spectrum of compound A2

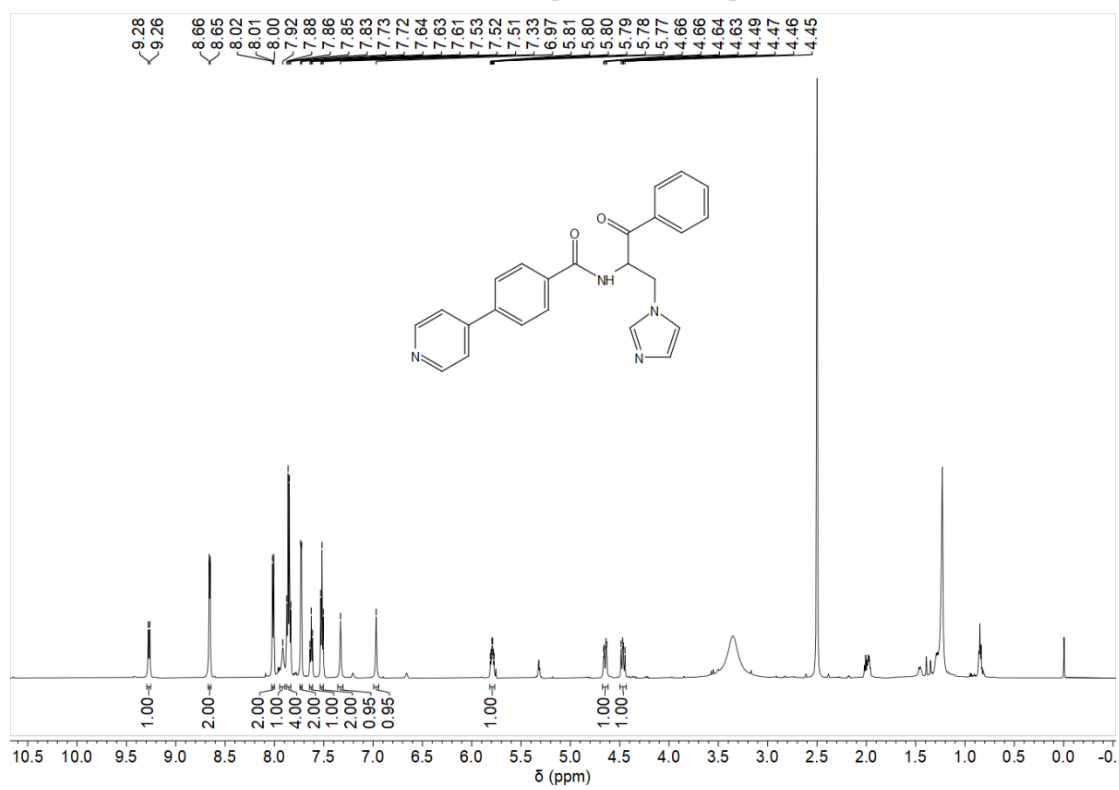

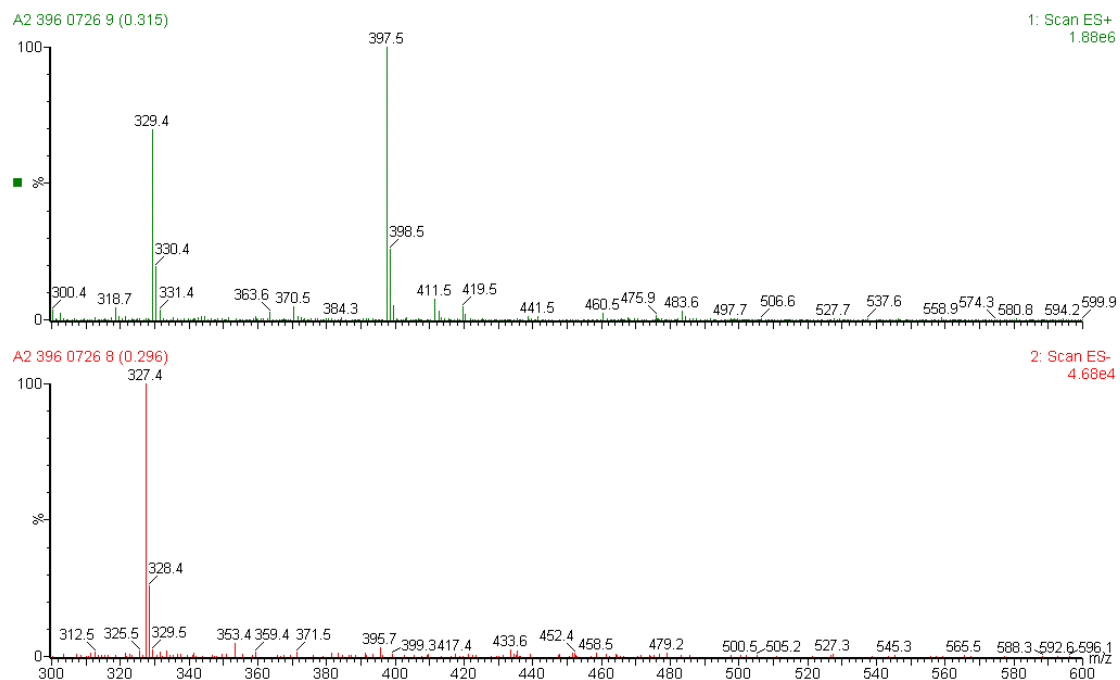

The  $^1\text{H}$ -NMR and MS spectrum of compound **A3**

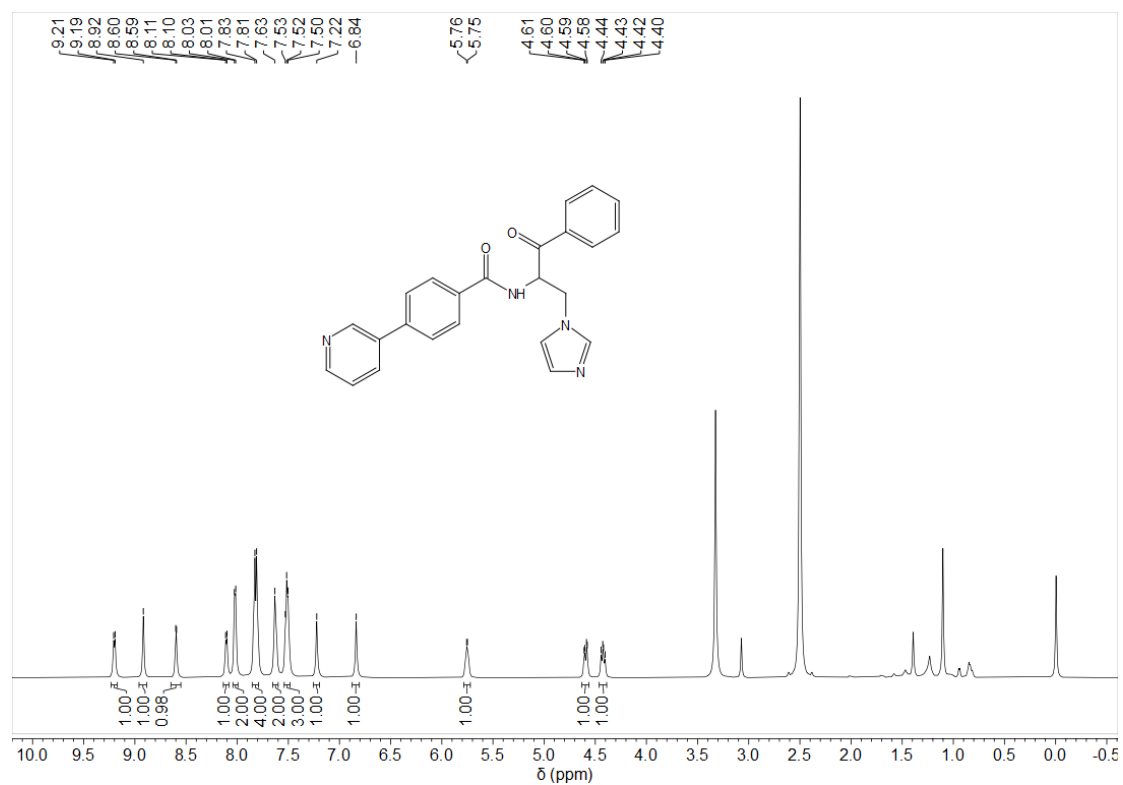

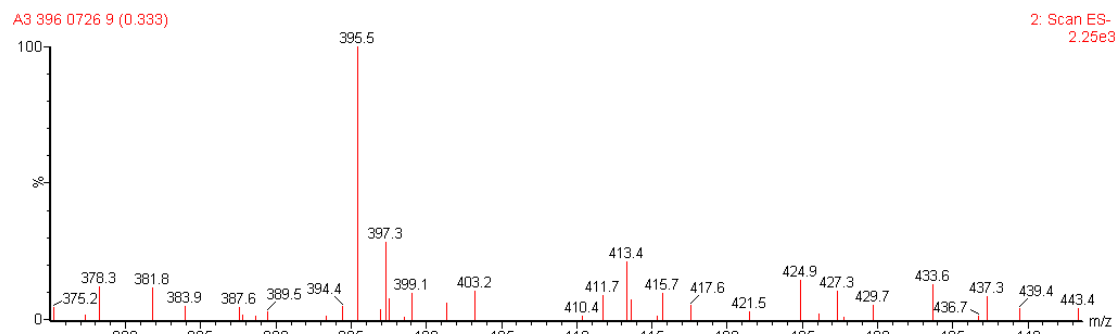

The <sup>1</sup>H-NMR and MS spectrum of compound **A4**

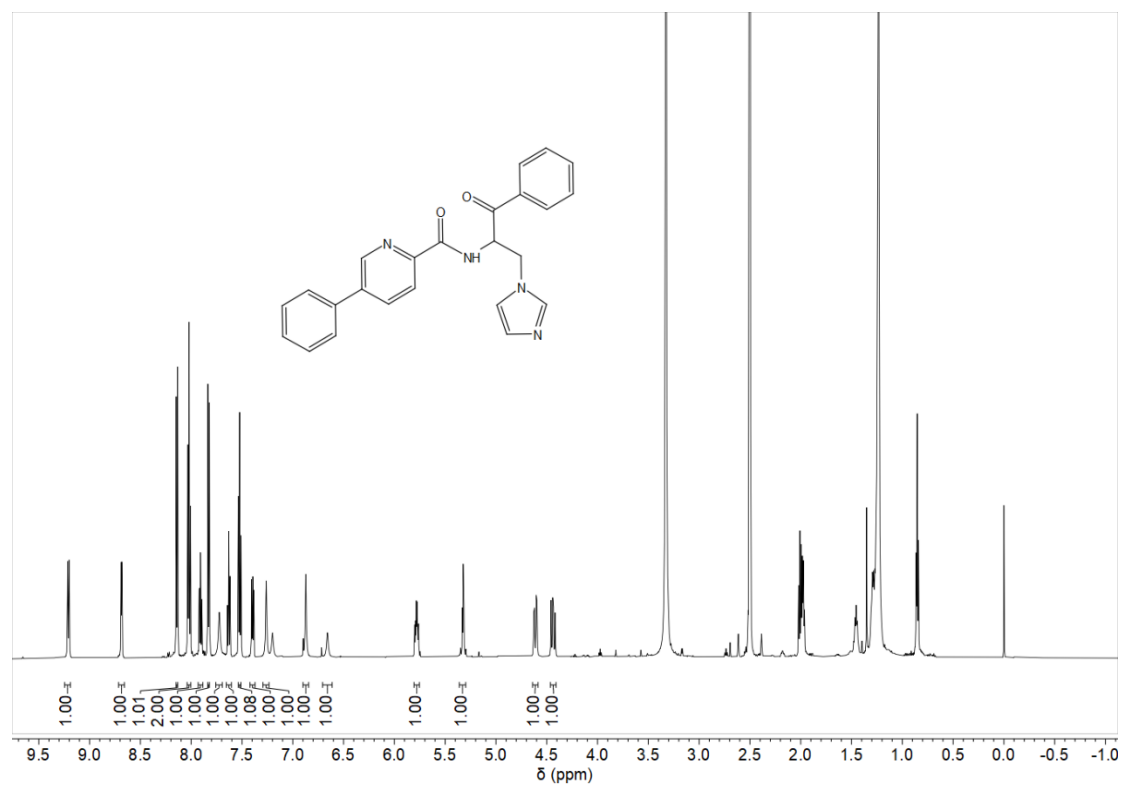

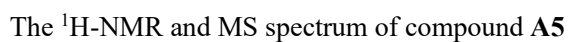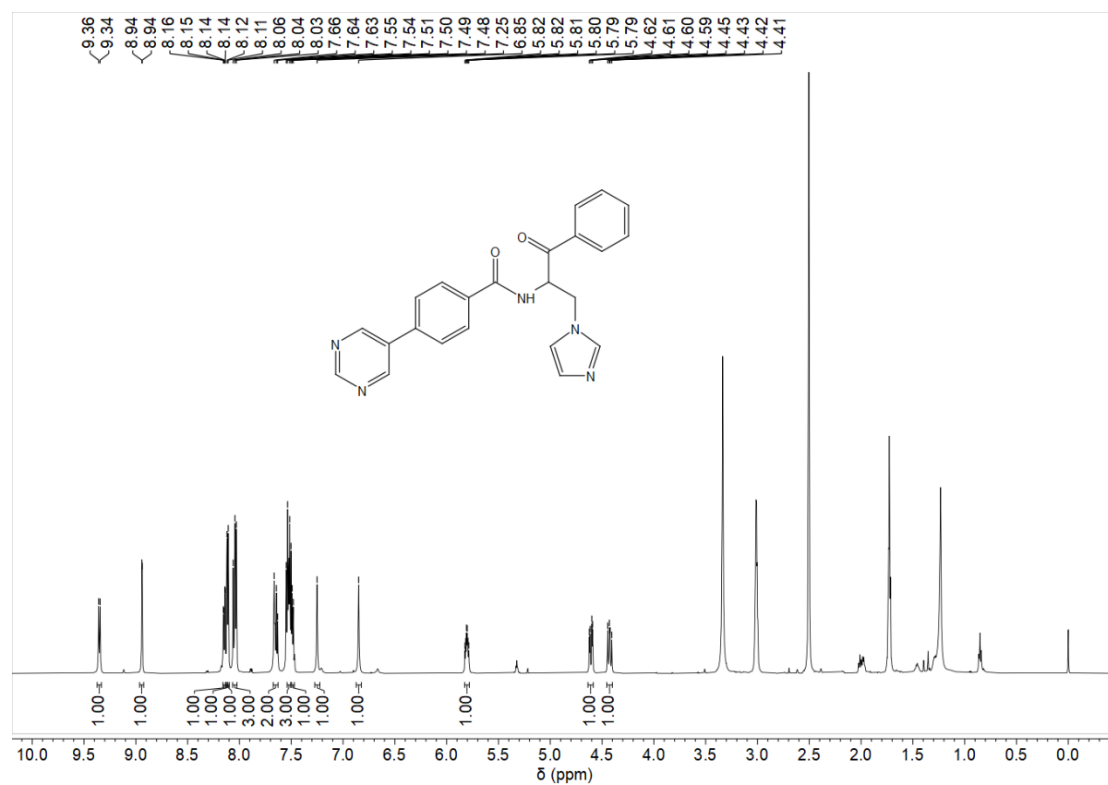

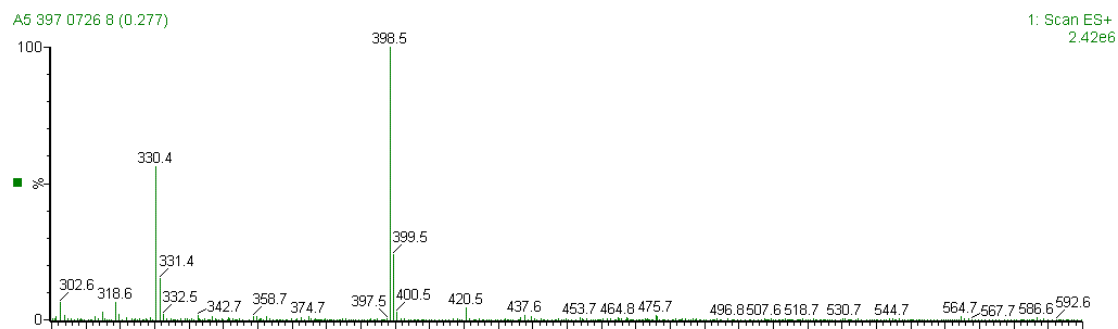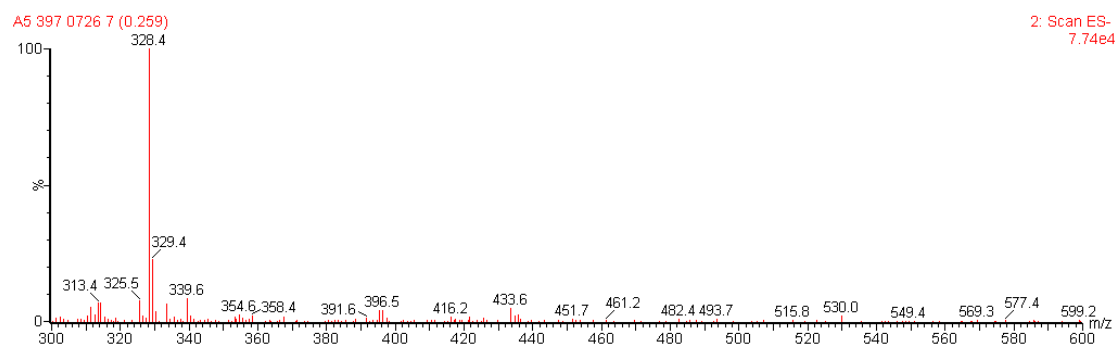

The  $^1\text{H}$ -NMR and MS spectrum of compound A6

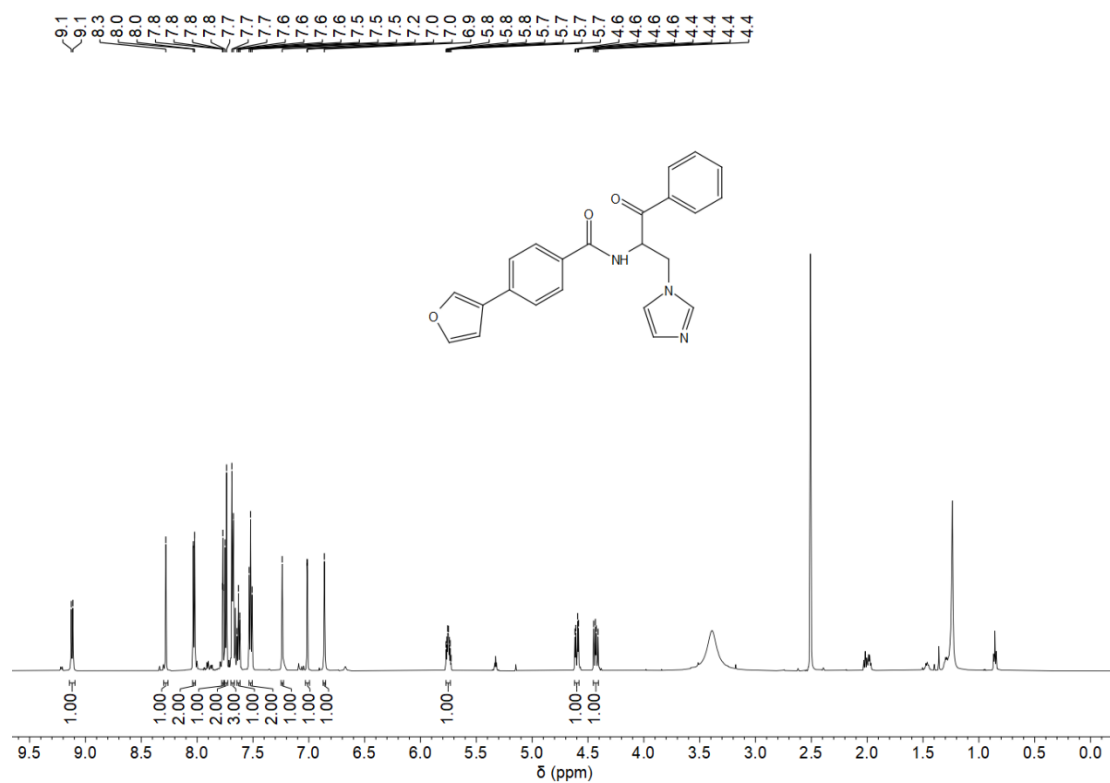

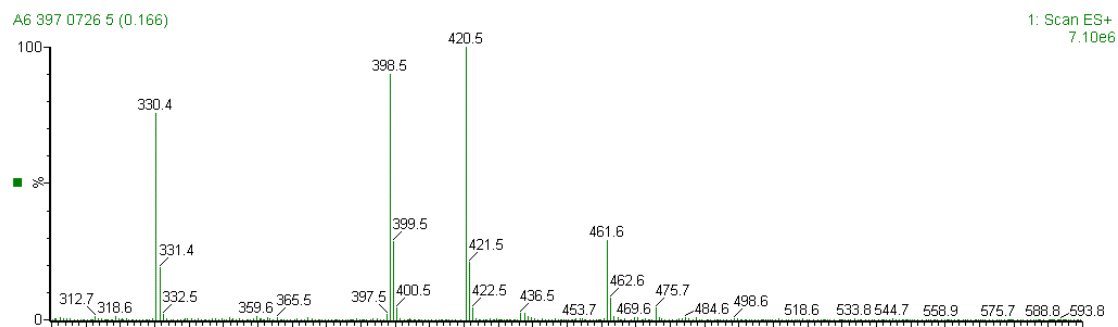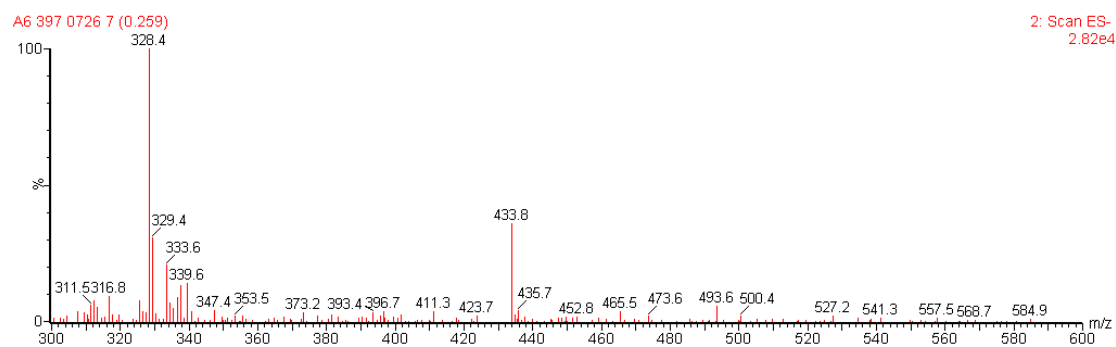

The  $^1\text{H}$ -NMR and MS spectrum of compound A7

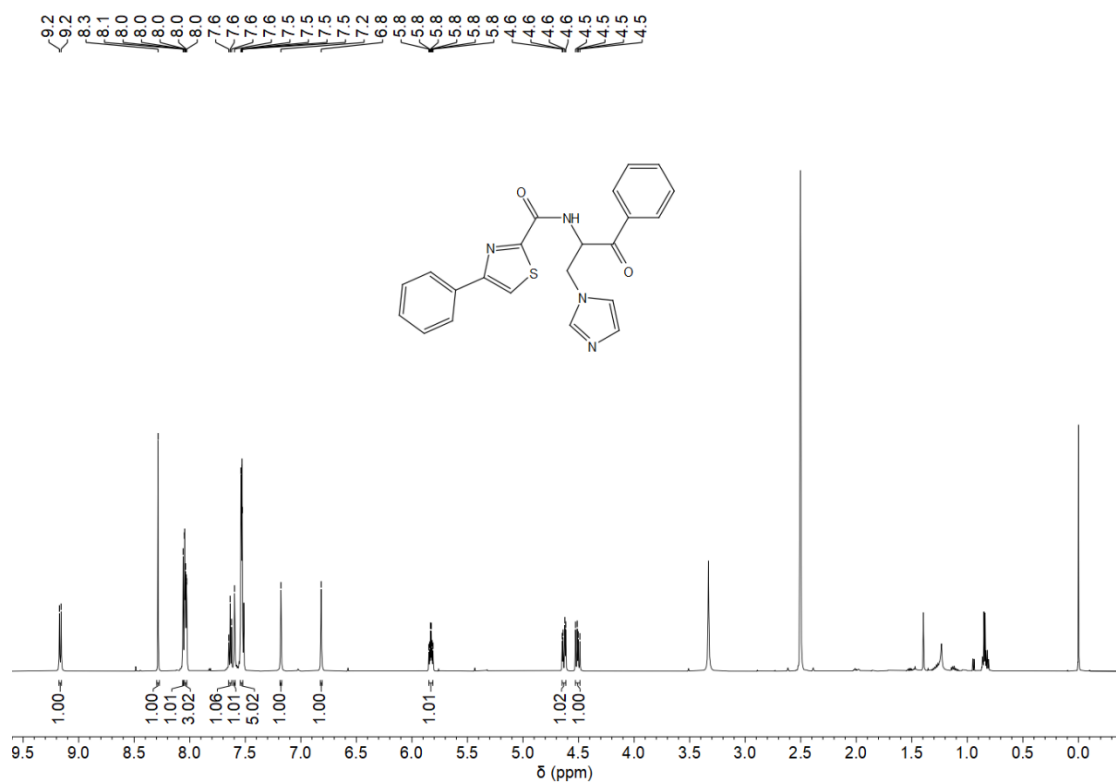

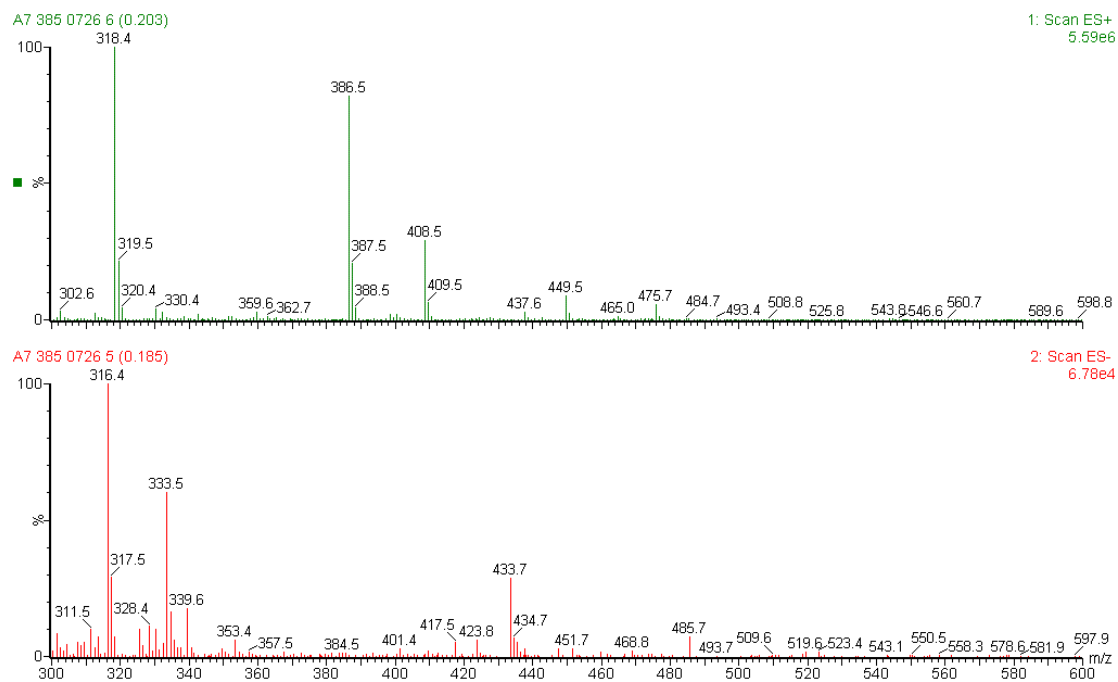

The <sup>1</sup>H-NMR and MS spectrum of compound A8

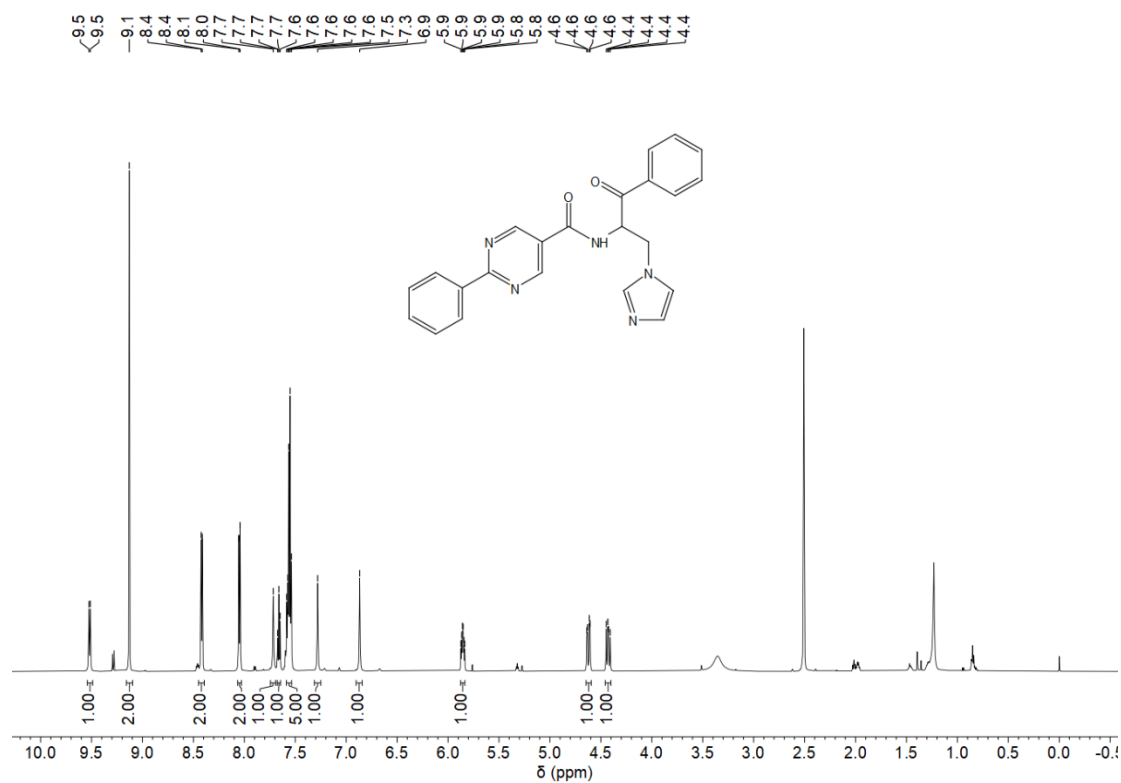

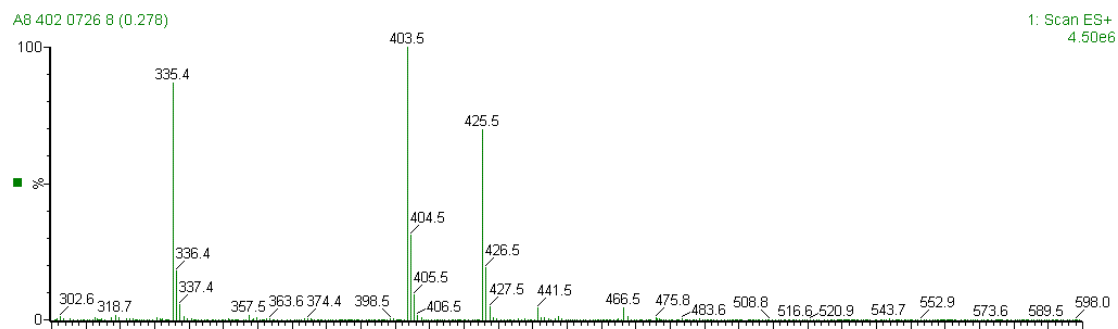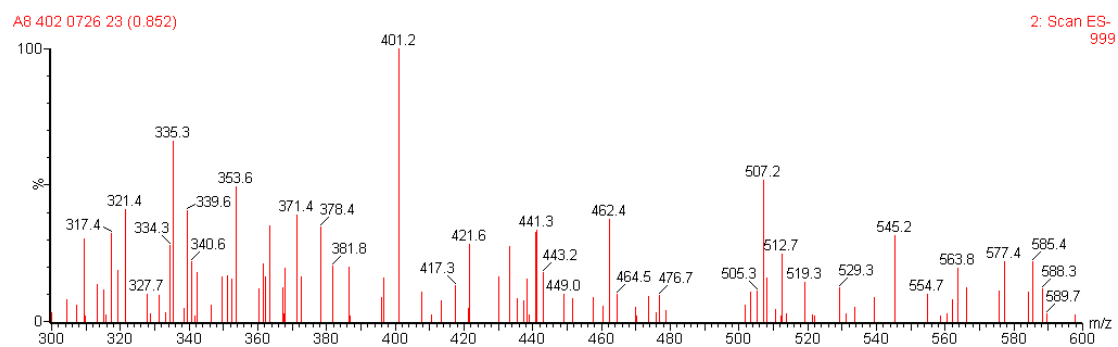

The  $^1\text{H}$ -NMR and MS spectrum of compound A9



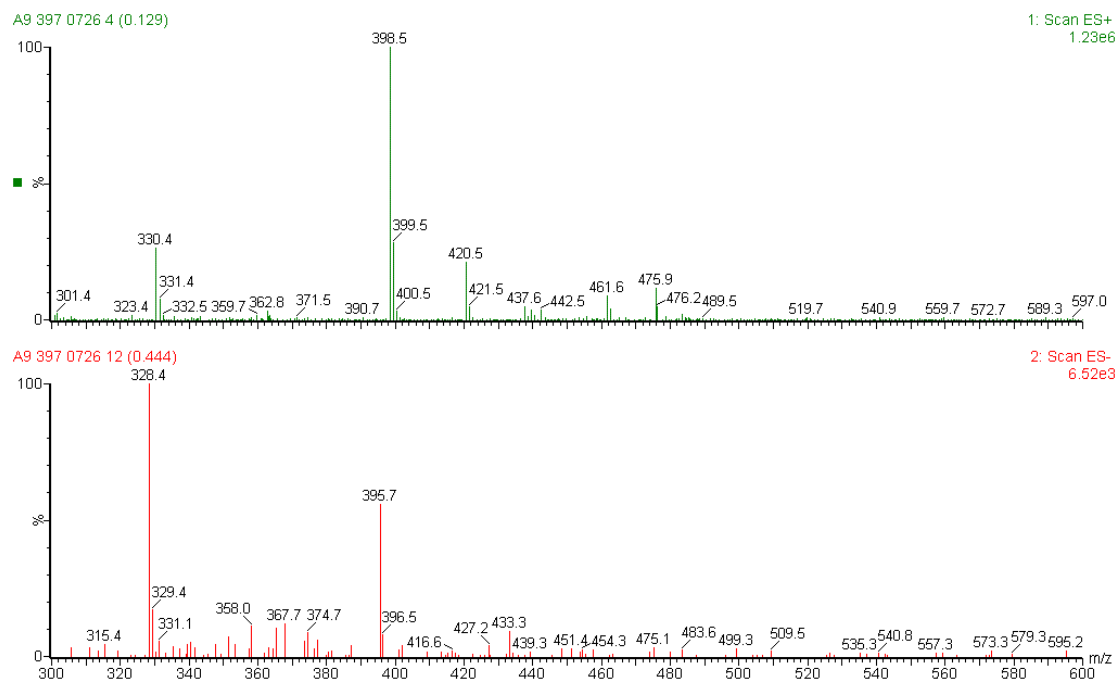

The  $^1\text{H}$ -NMR and MS spectrum of compound **B1**

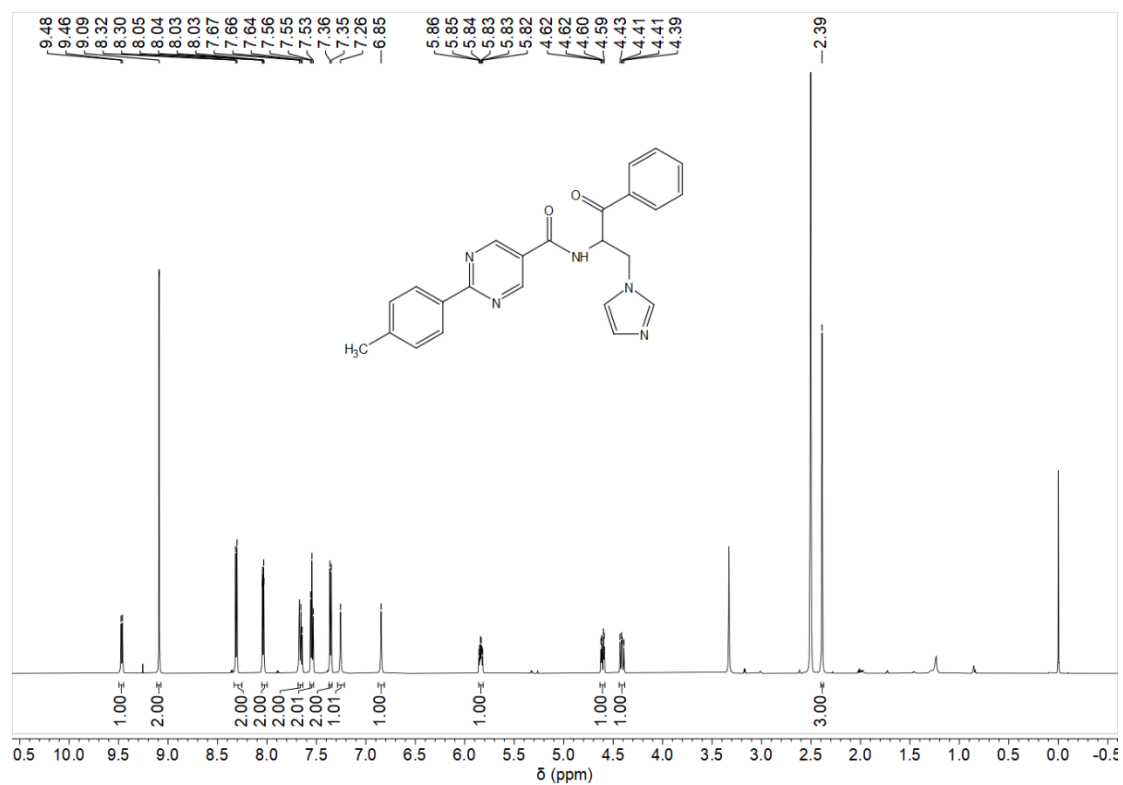

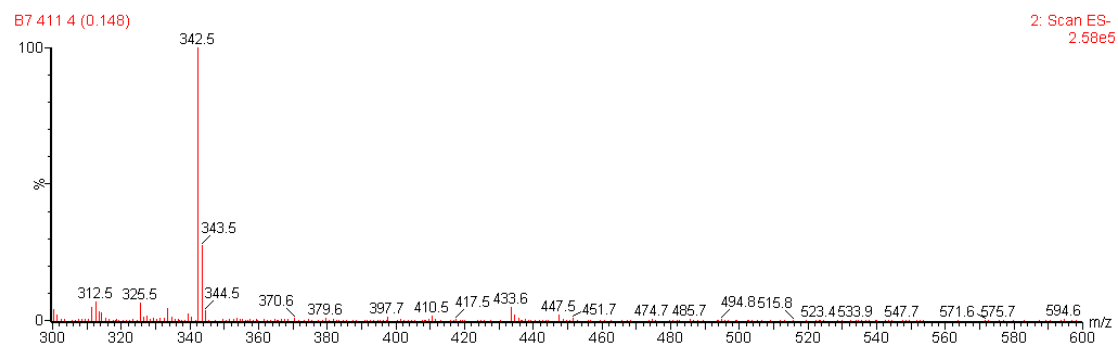

<sup>1</sup>H NMR spectrum of compound 6j in CDCl<sub>3</sub>. The x-axis represents the chemical shift δ (ppm), ranging from -0.5 to 10.0. The spectrum displays several peaks corresponding to the protons in the molecule. Key features include aromatic signals between 6.8 and 9.5 ppm, a methoxy singlet at ~3.85 ppm, and aliphatic signals around 4.4-4.6 ppm. Integration values are shown below the baseline.

| Chemical Shift δ (ppm) | Integration |
|------------------------|-------------|
| ~9.45                  | 1.0         |
| ~8.37                  | 2.0         |
| ~8.05                  | 2.0         |
| ~7.67                  | 2.0         |
| ~7.64                  | 2.0         |
| ~7.56                  | 2.0         |
| ~7.55                  | 2.0         |
| ~7.53                  | 2.0         |
| ~7.26                  | 1.0         |
| ~7.10                  | 2.0         |
| ~7.08                  | 2.0         |
| ~6.85                  | 1.0         |
| ~5.85                  | 1.0         |
| ~4.62                  | 1.0         |
| ~4.61                  | 1.0         |
| ~4.60                  | 3.0         |
| ~4.59                  | 1.0         |
| ~4.43                  | 1.0         |
| ~4.41                  | 1.0         |
| ~4.41                  | 1.0         |
| ~4.39                  | 1.0         |
| ~3.85                  | 1.0         |

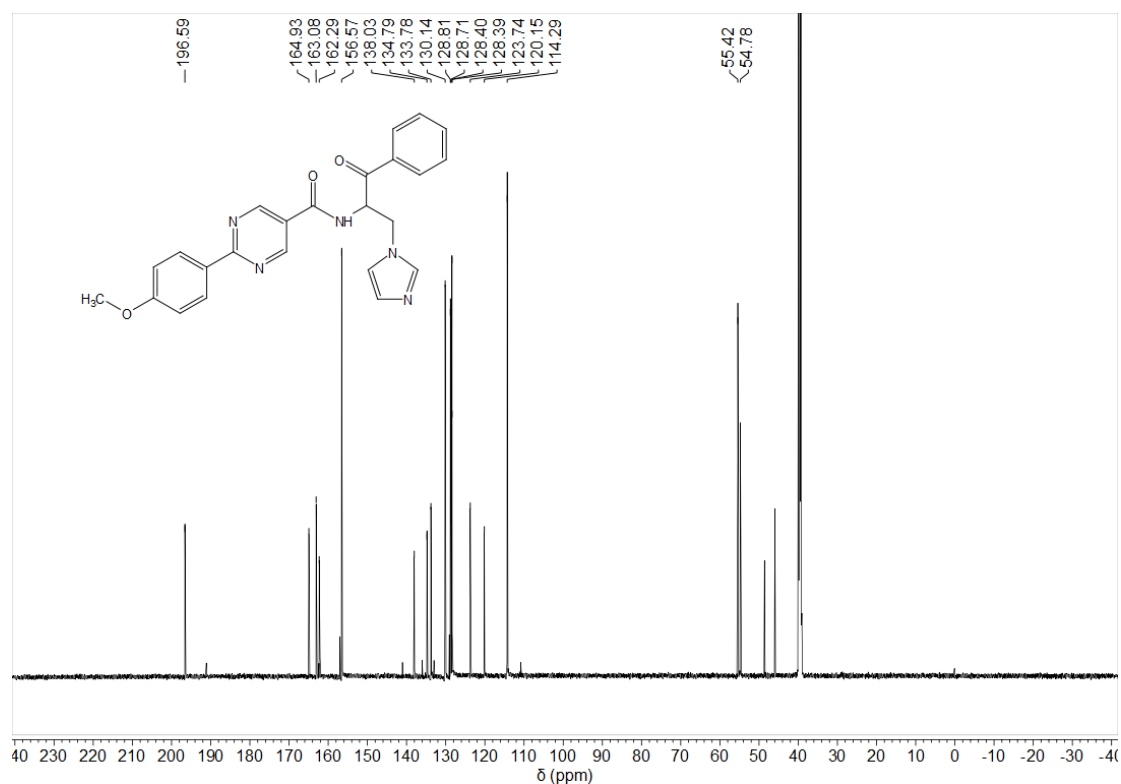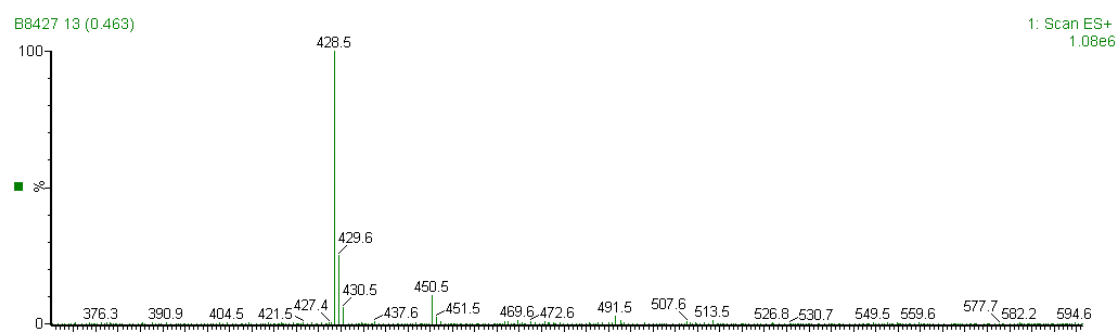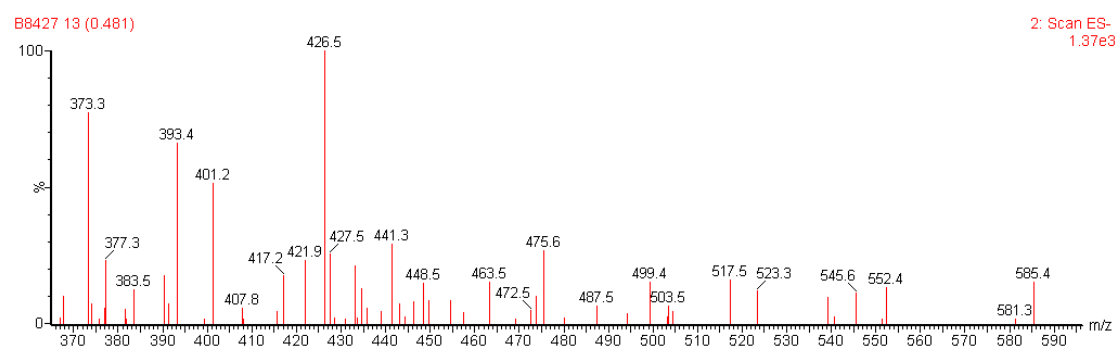

The <sup>1</sup>H-NMR and MS spectrum of compound **B3**

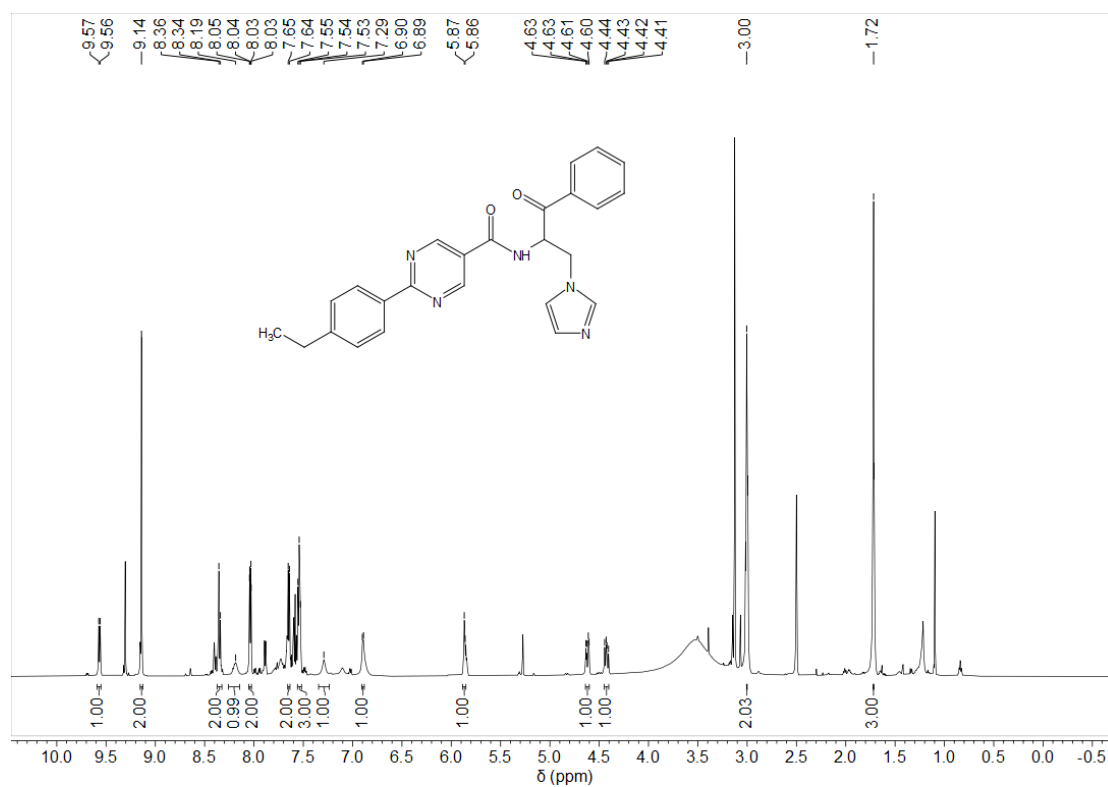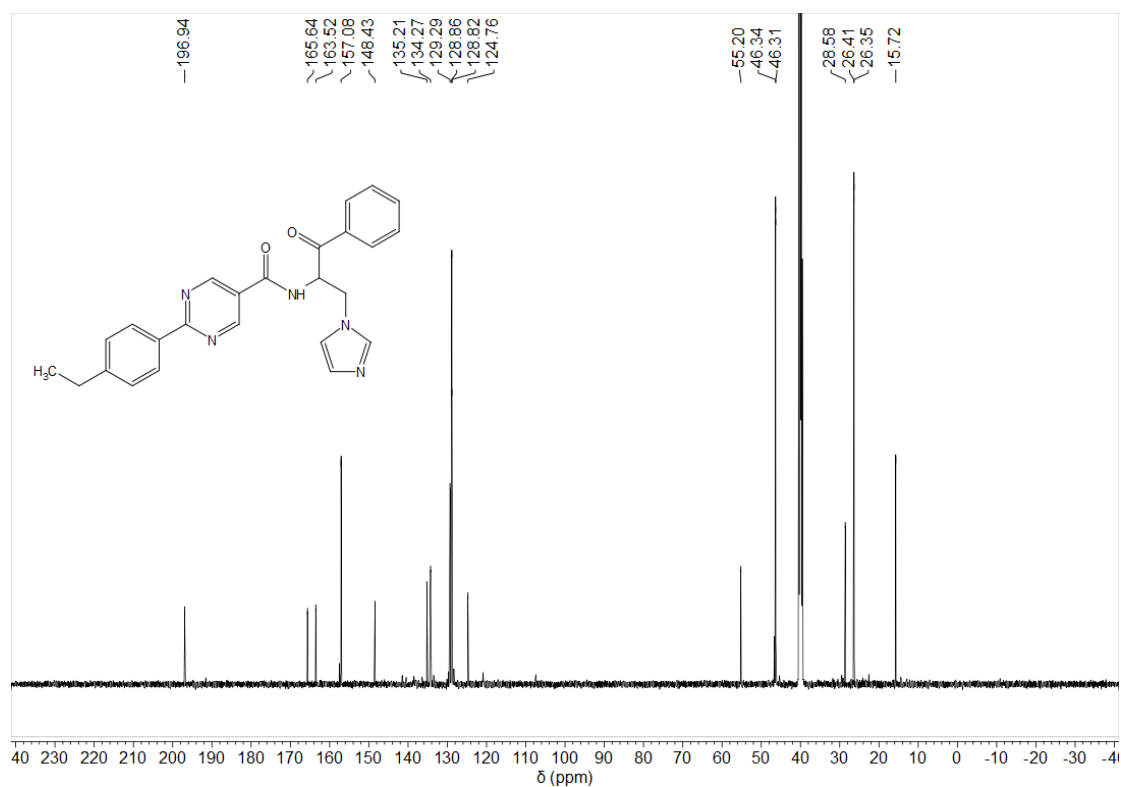

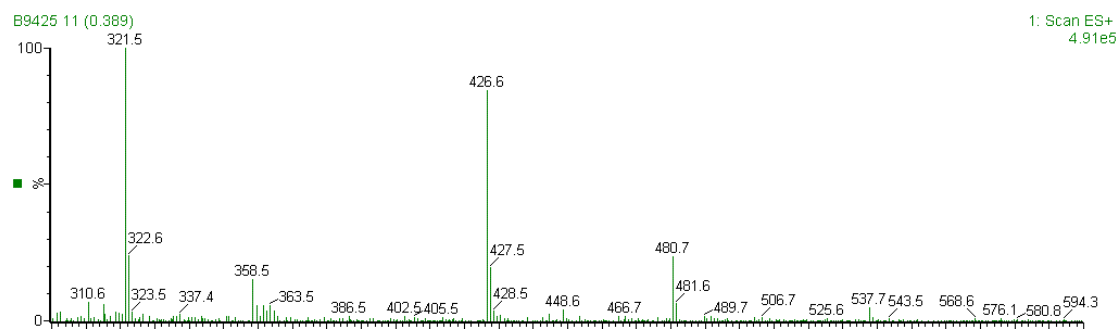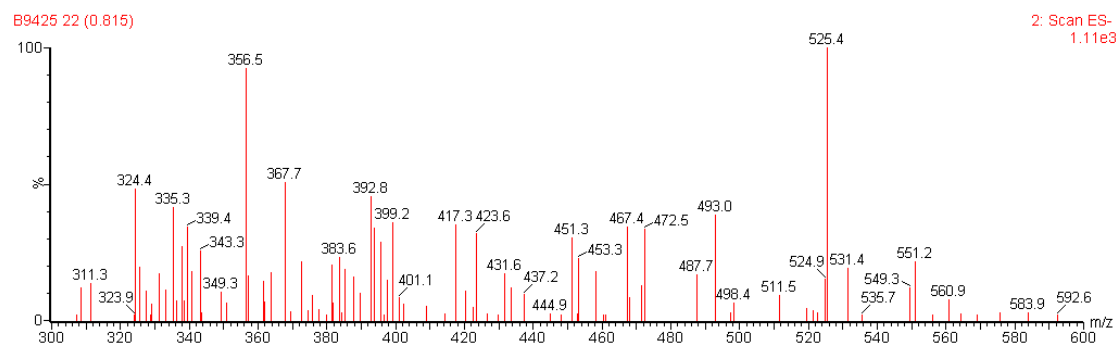

The  $^1\text{H}$ -NMR and MS spectrum of compound B4

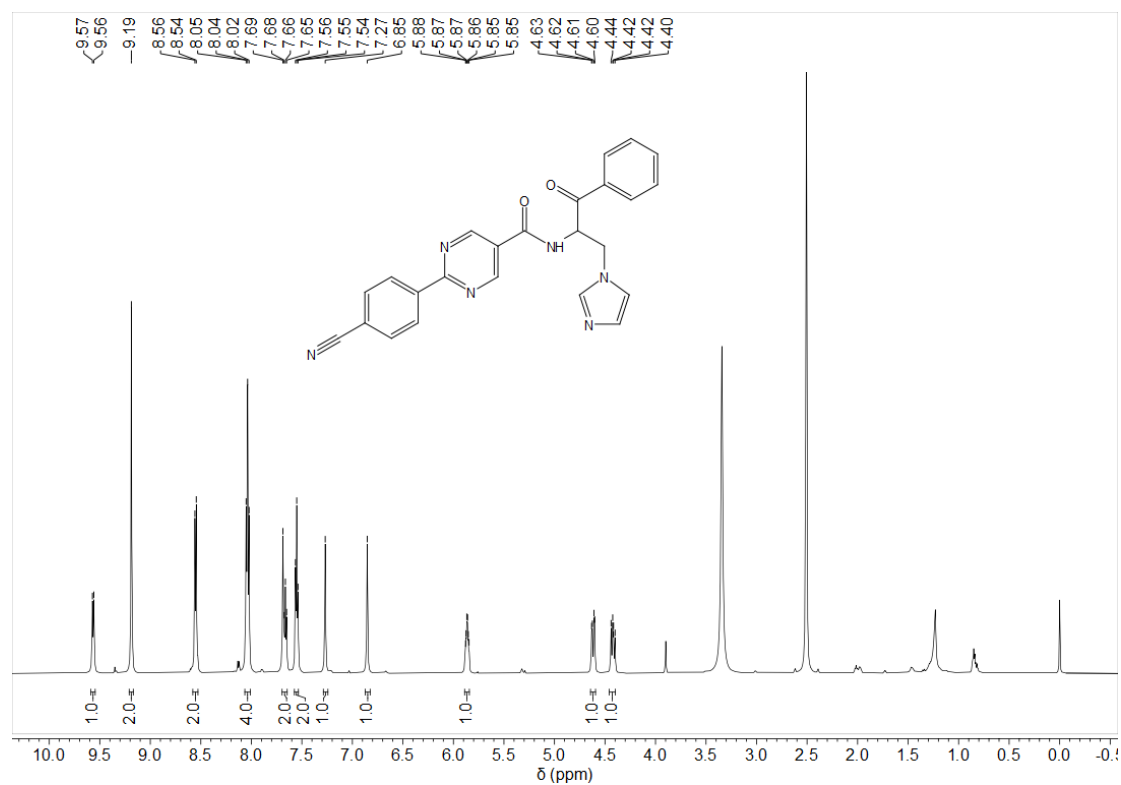

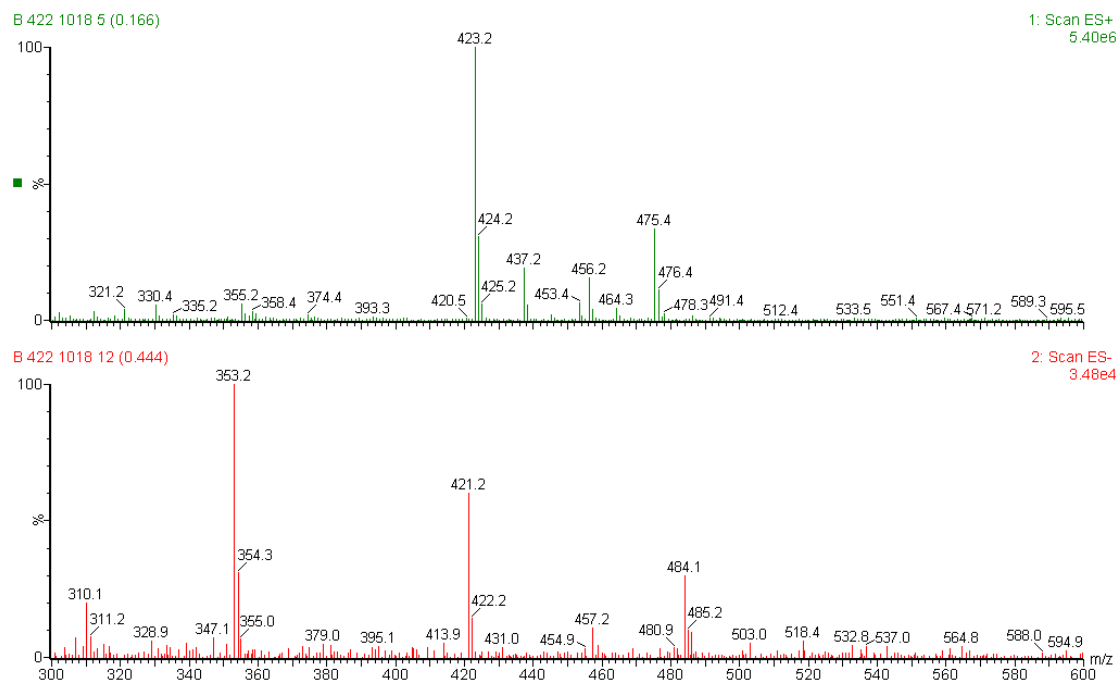

The  $^1\text{H}$ -NMR,  $^{13}\text{C}$  NMR and MS spectrum of compound **B5**

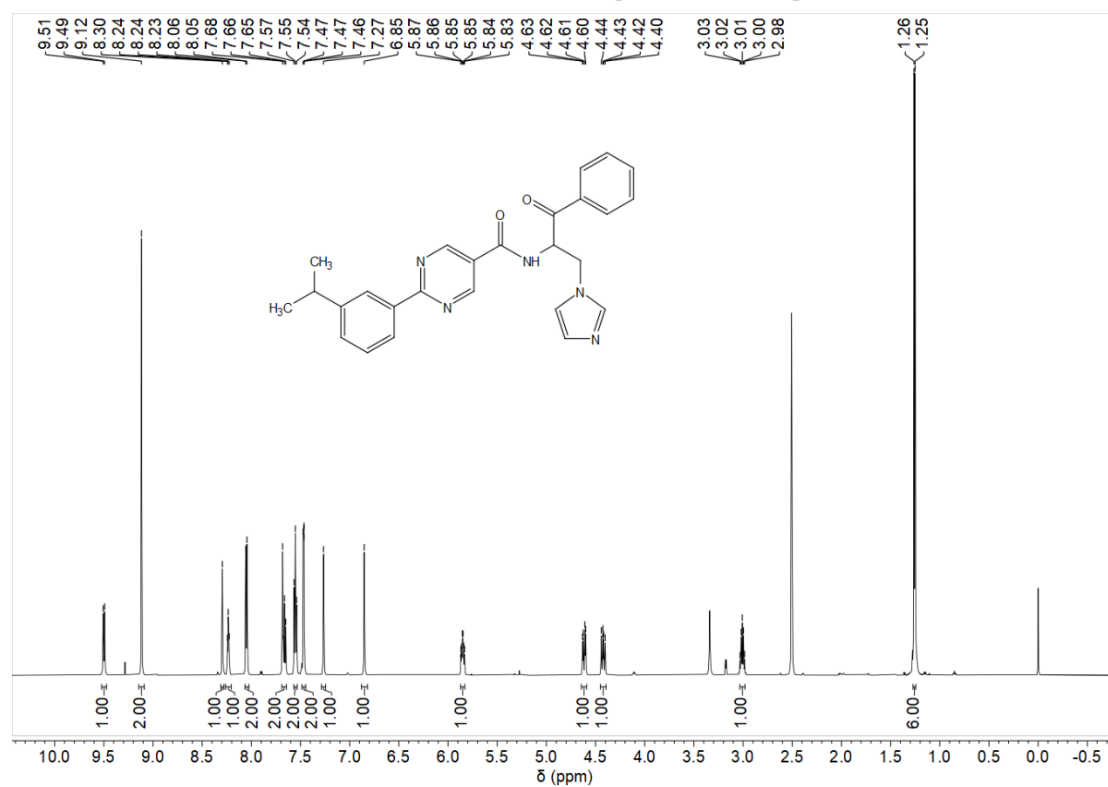

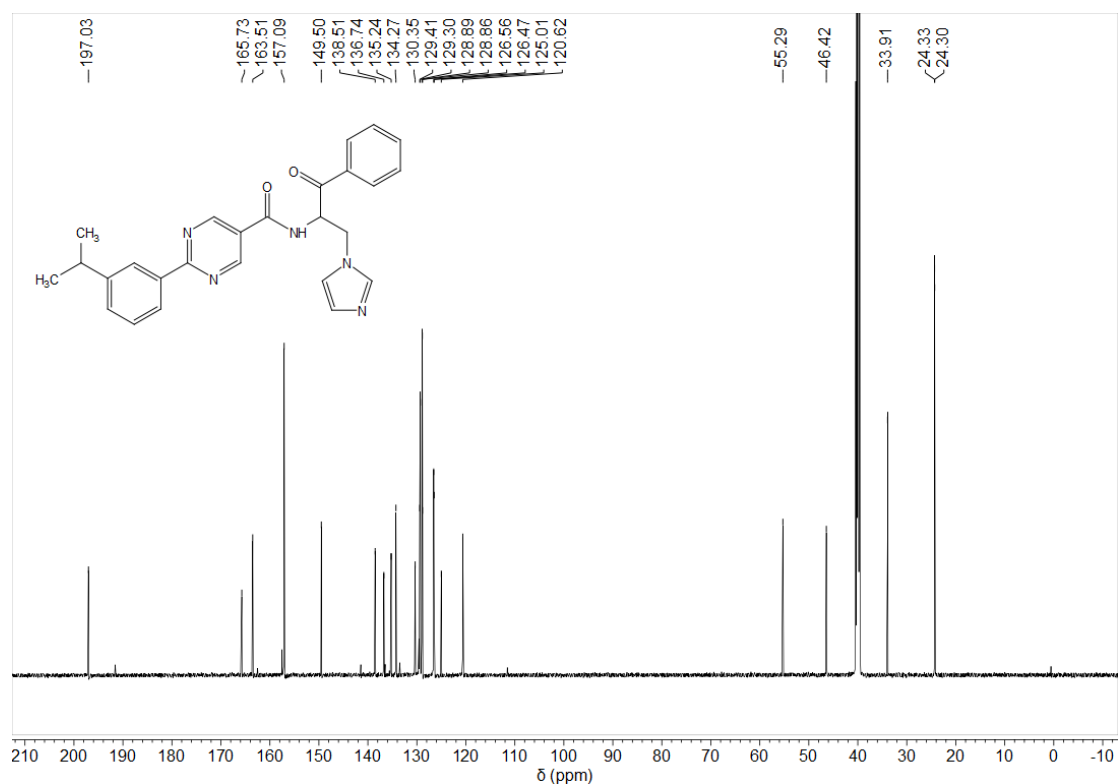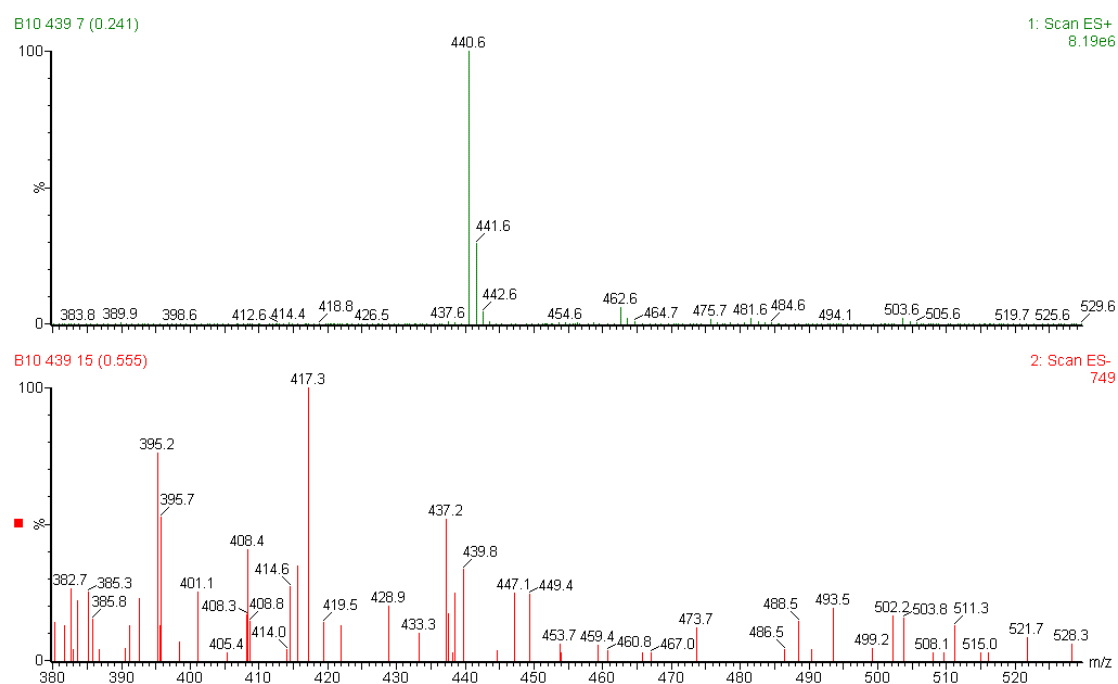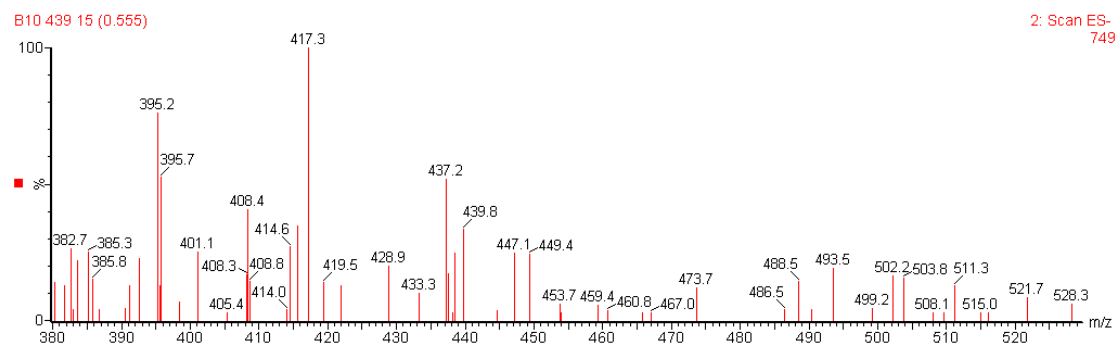

The <sup>1</sup>H-NMR, <sup>13</sup>C NMR and MS spectrum of compound B6

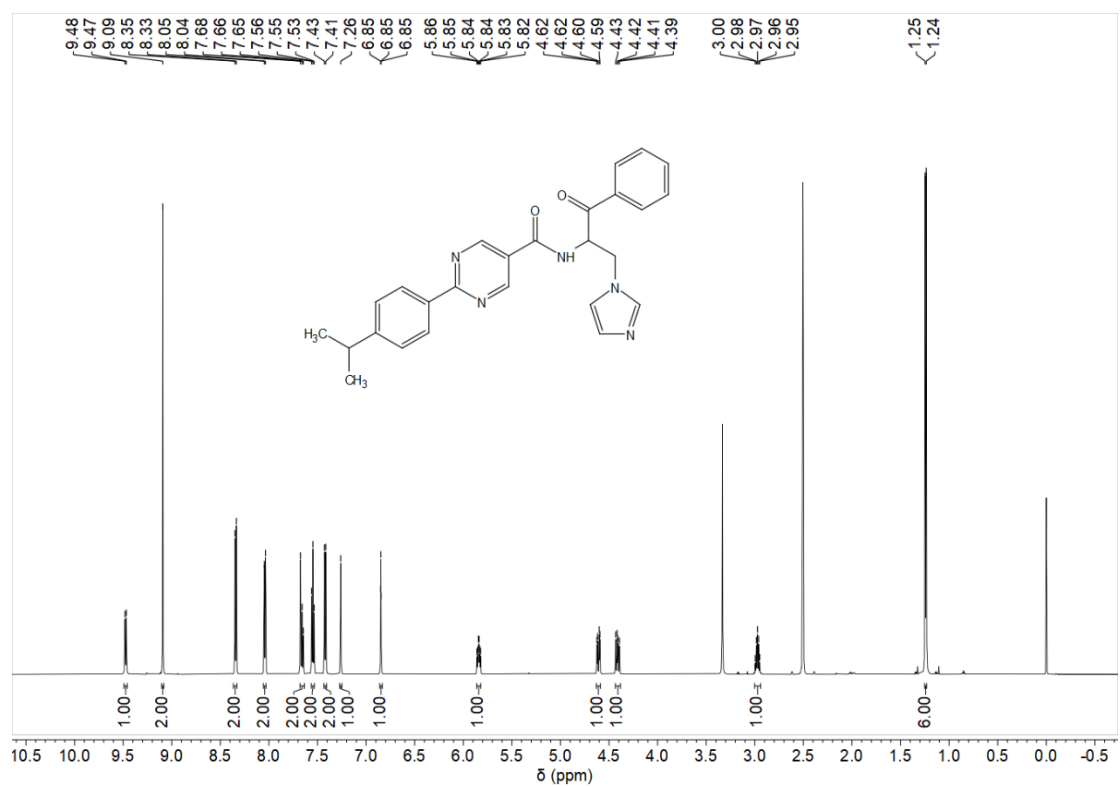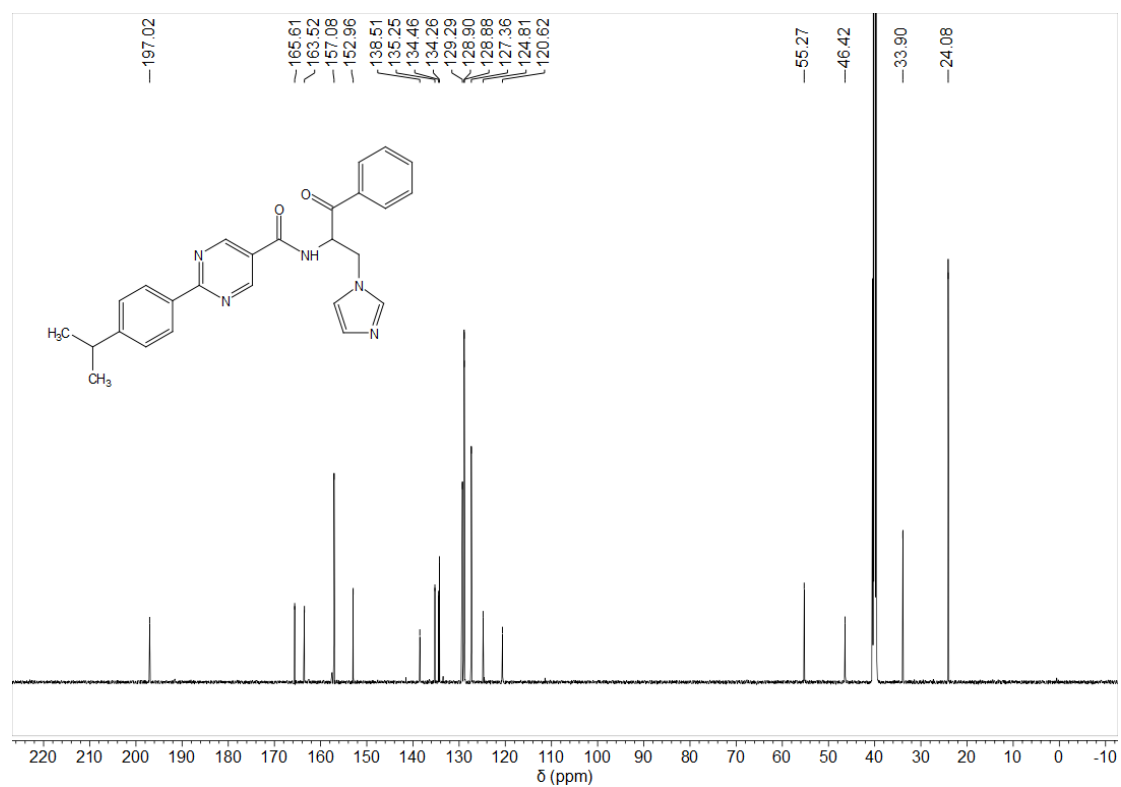

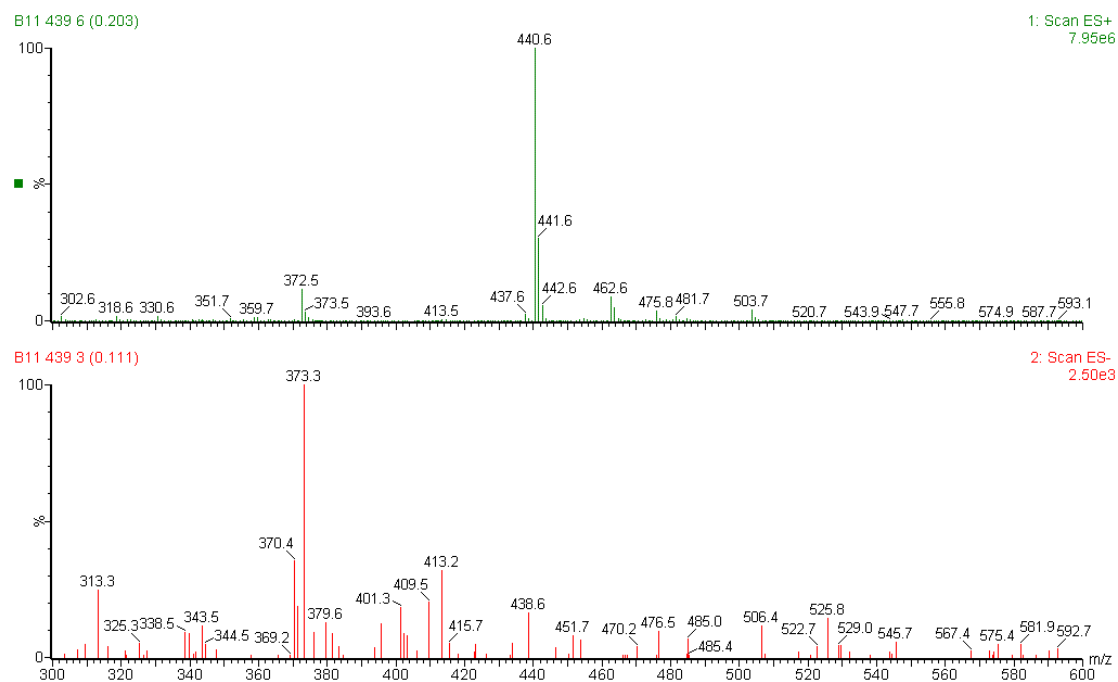

The  $^1\text{H}$ -NMR,  $^{13}\text{C}$  NMR and MS spectrum of compound **B7**

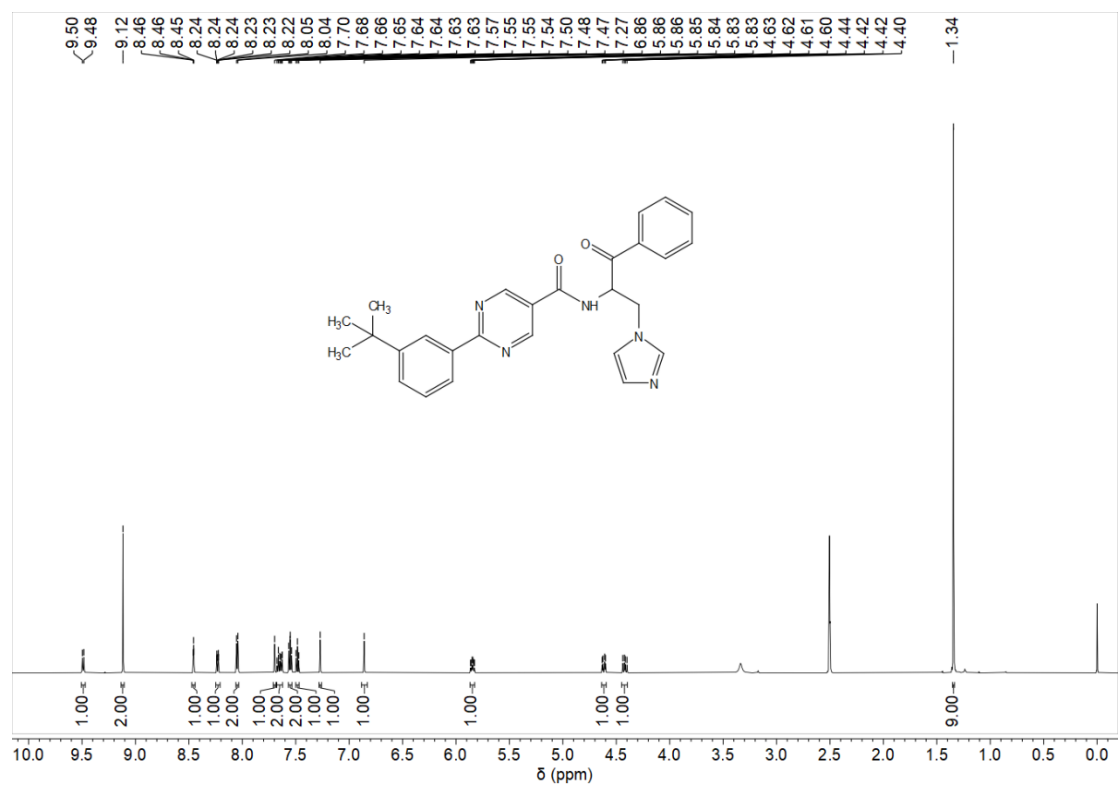

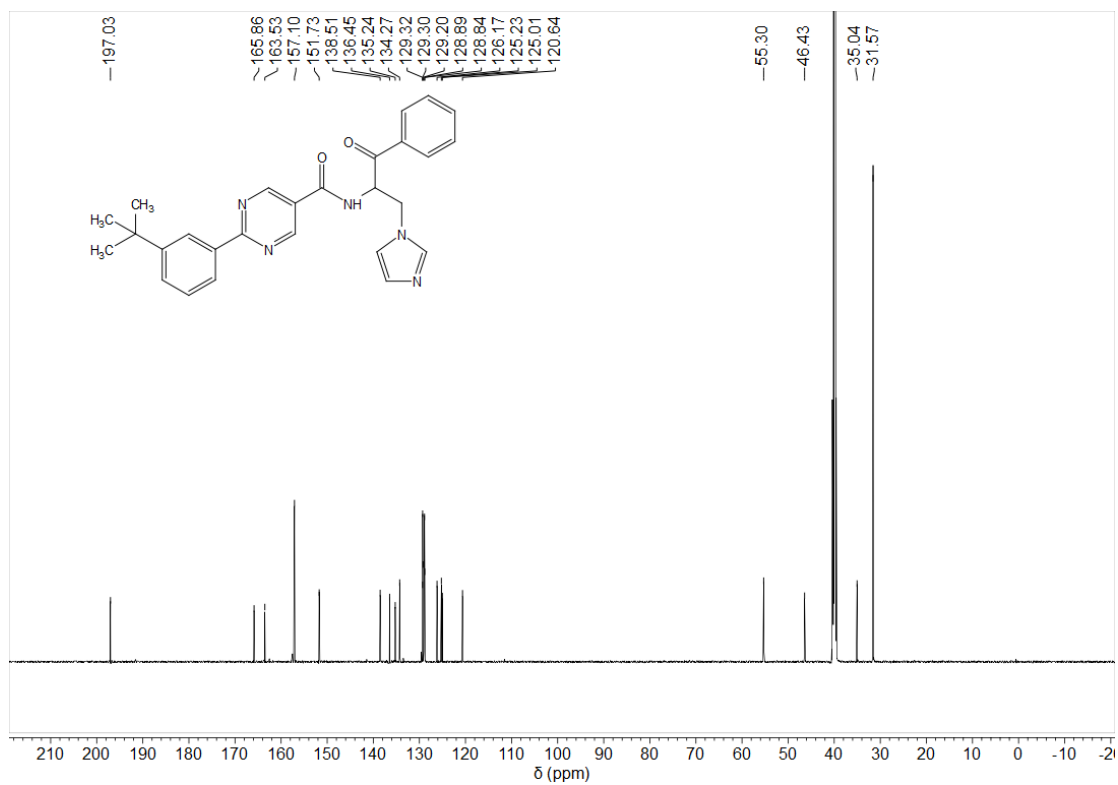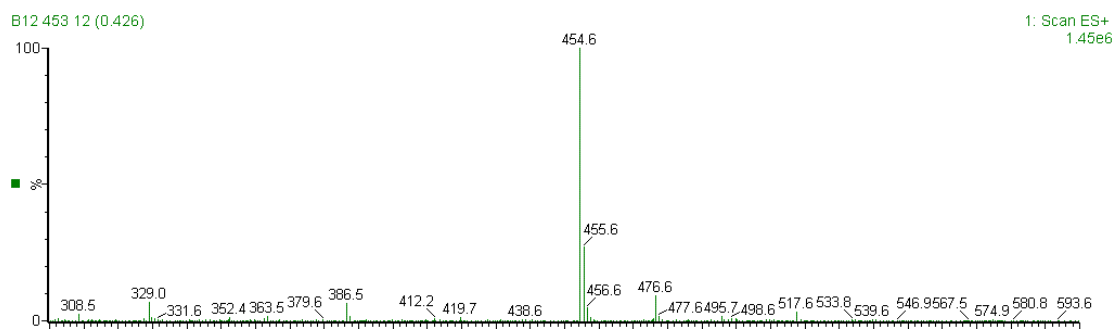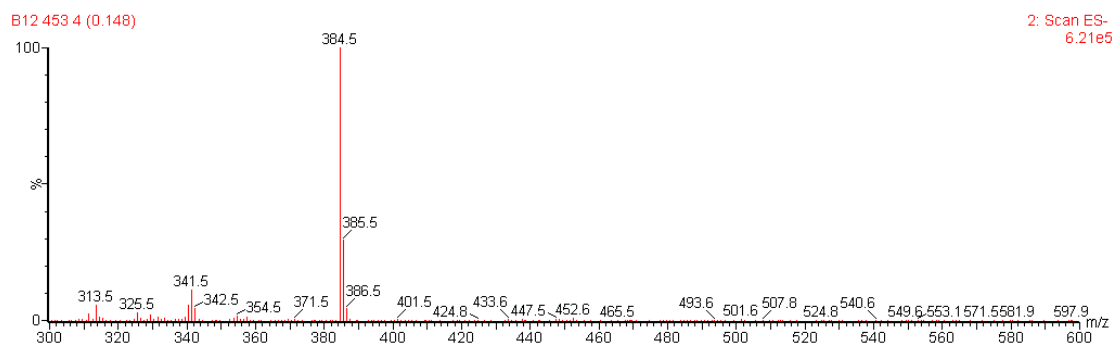

The <sup>1</sup>H-NMR and MS spectrum of compound **B8**

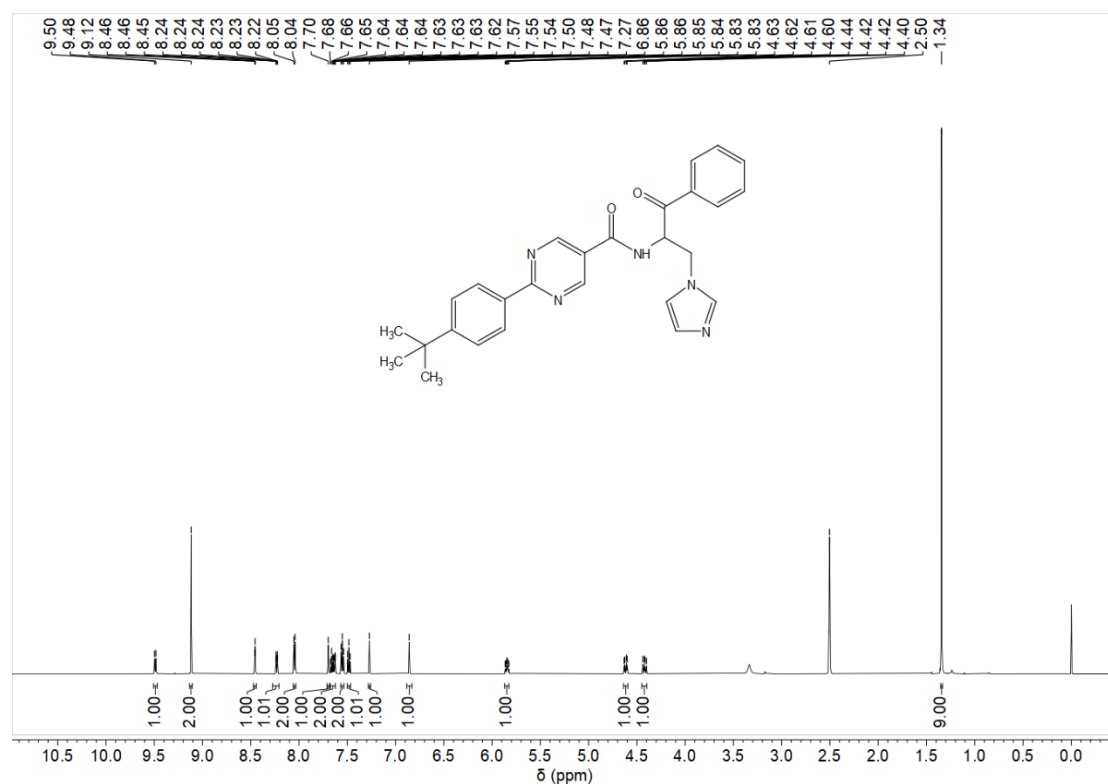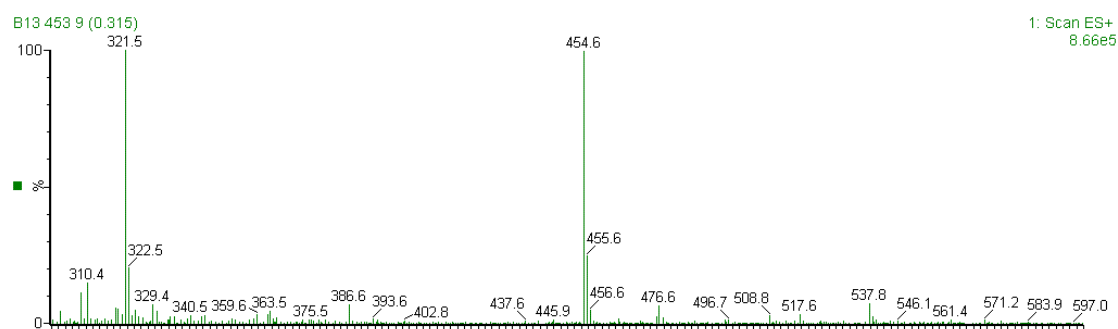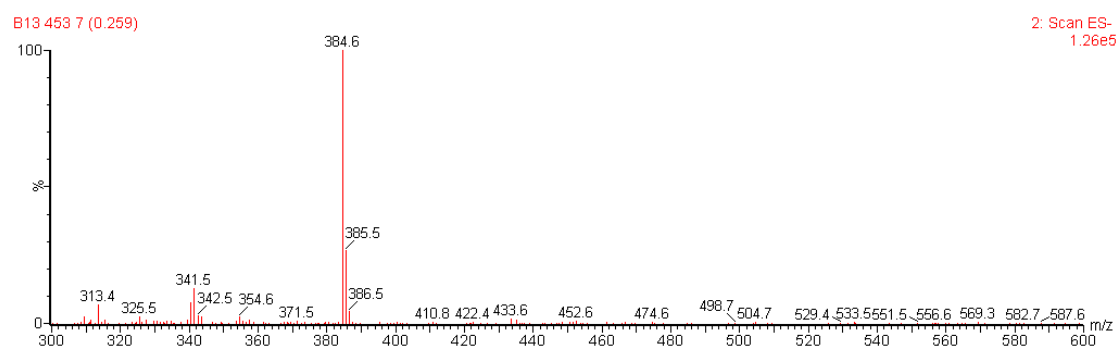

The <sup>1</sup>H-NMR, <sup>13</sup>C NMR and MS spectrum of compound **B9**

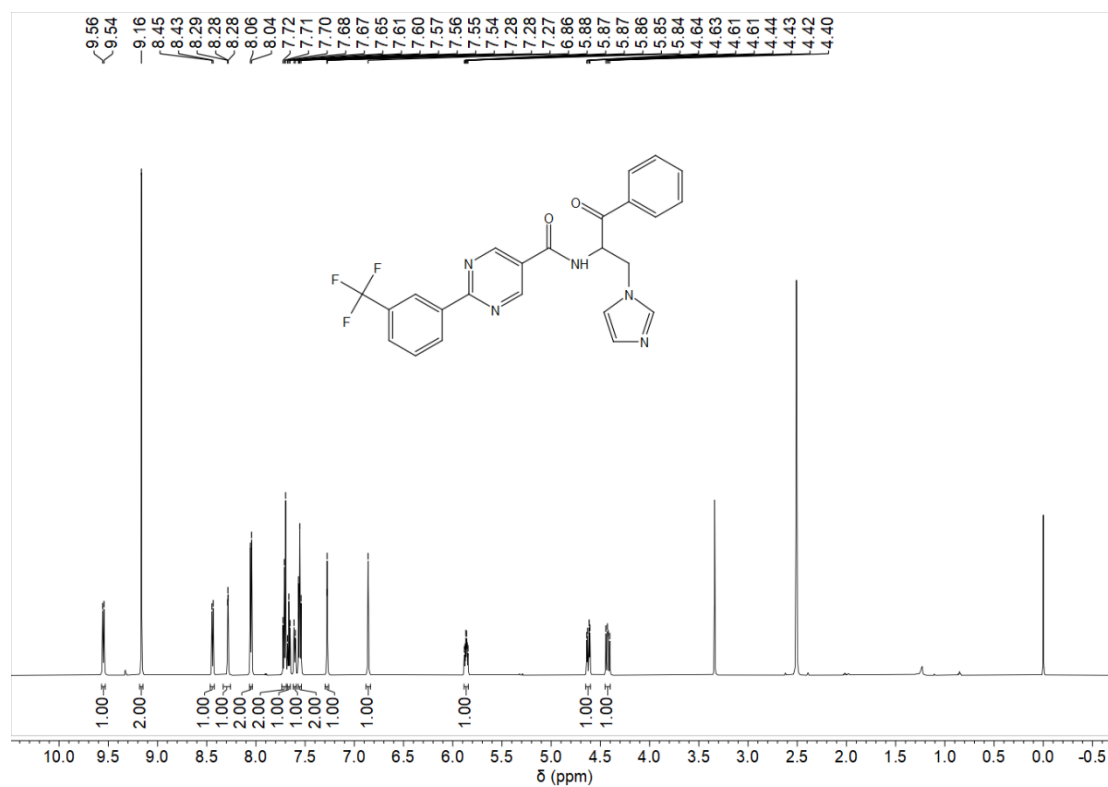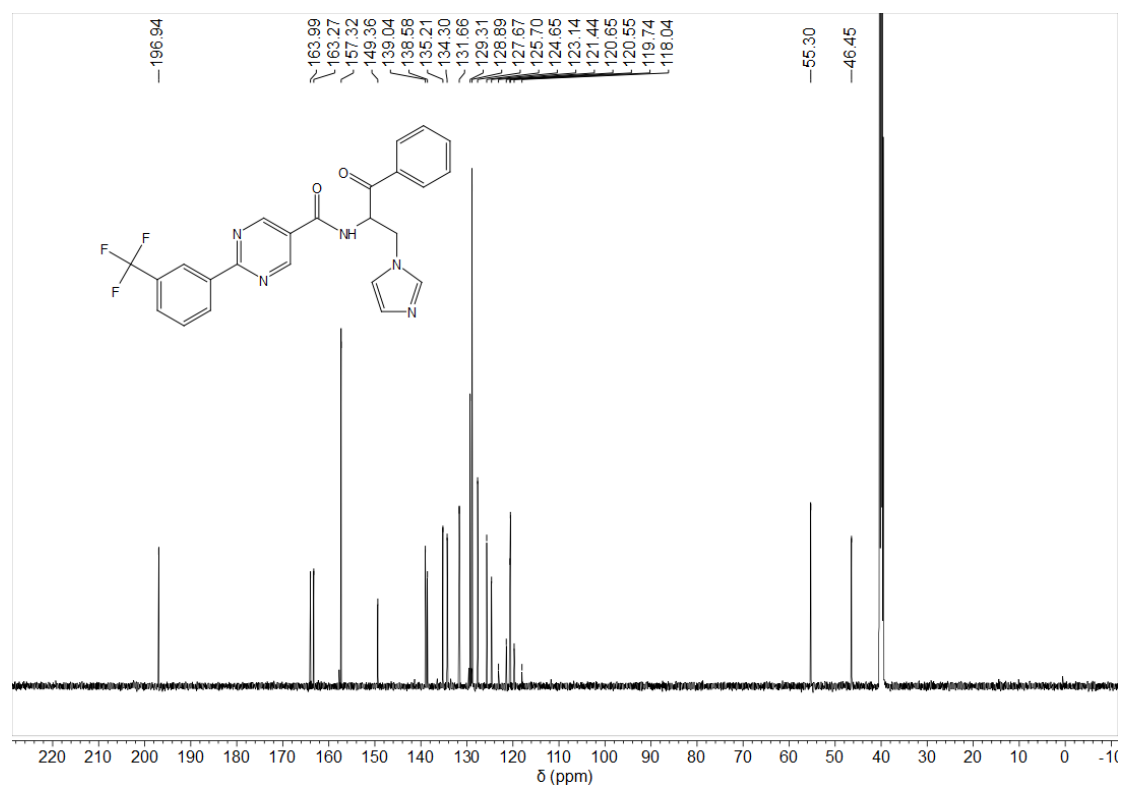



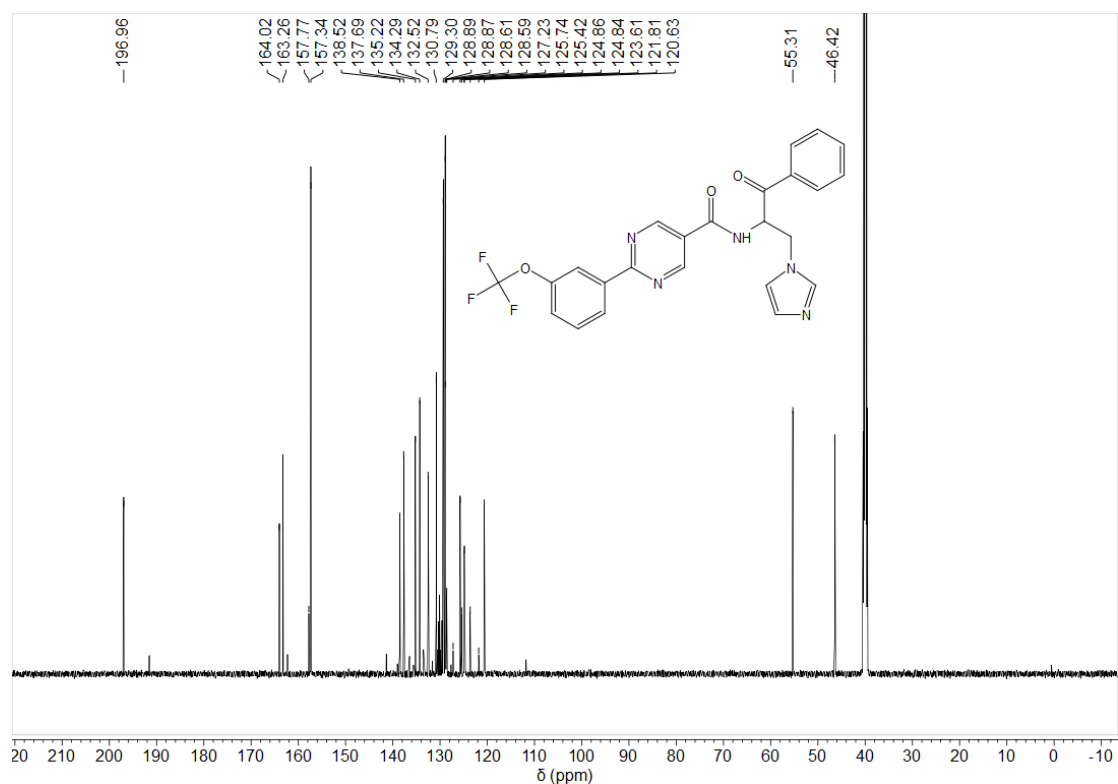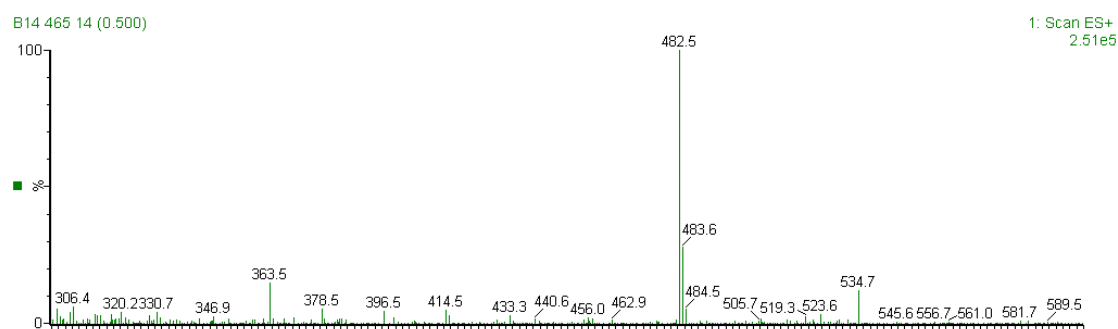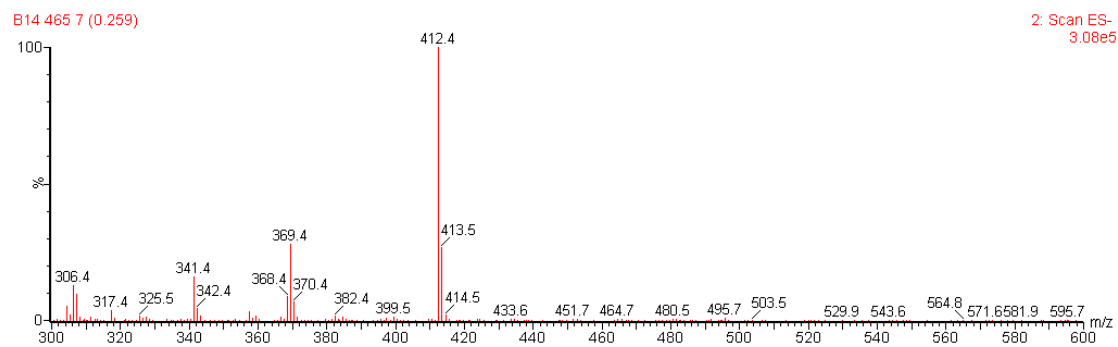

The <sup>1</sup>H-NMR, <sup>13</sup>C NMR and MS spectrum of compound **B11**

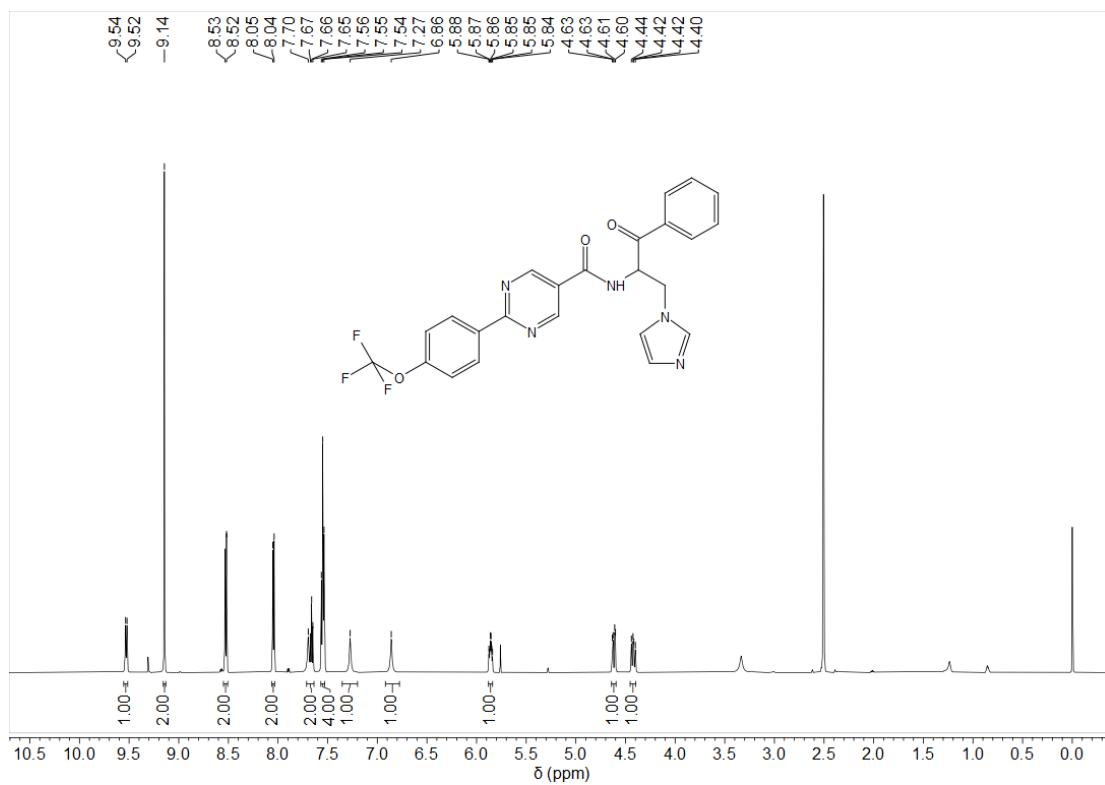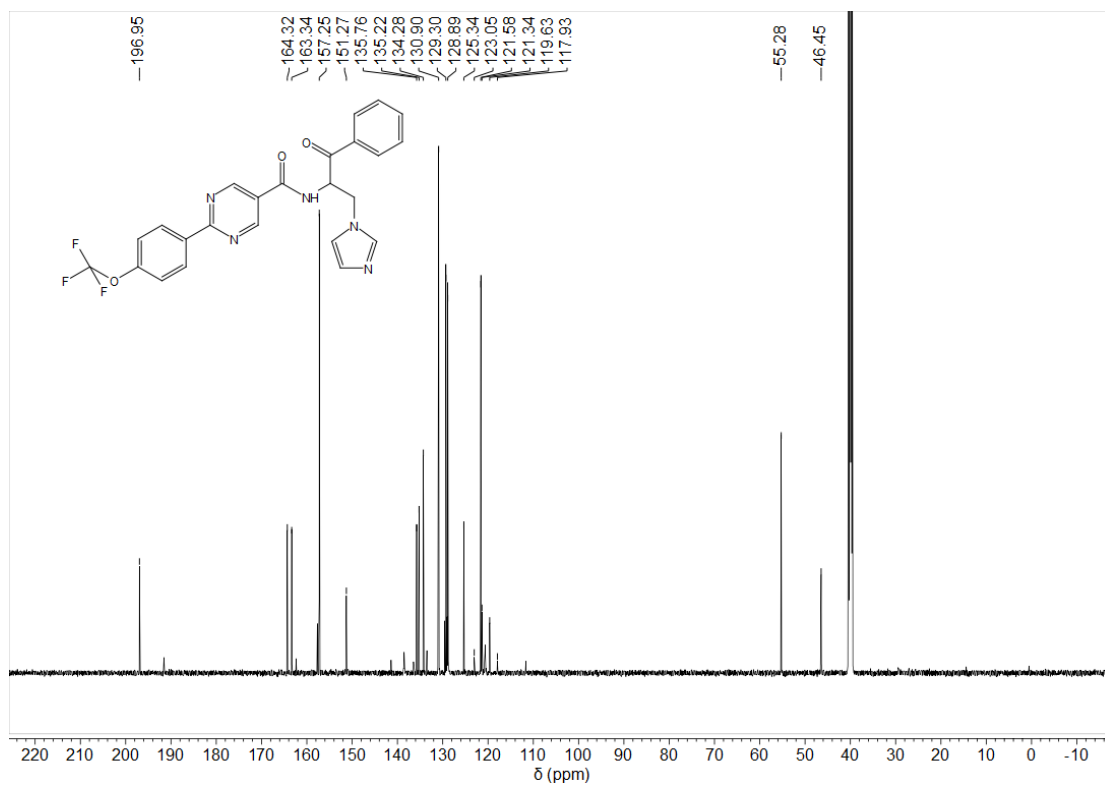

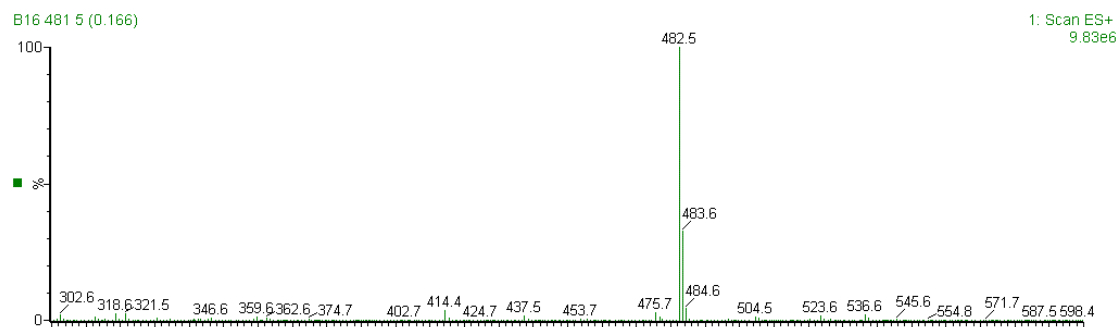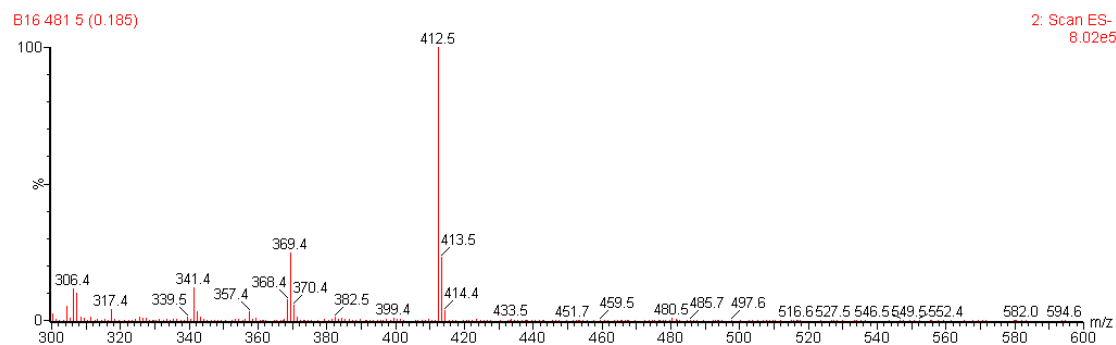

The  $^1\text{H}$ -NMR,  $^{13}\text{C}$  NMR and MS spectrum of compound **B12**

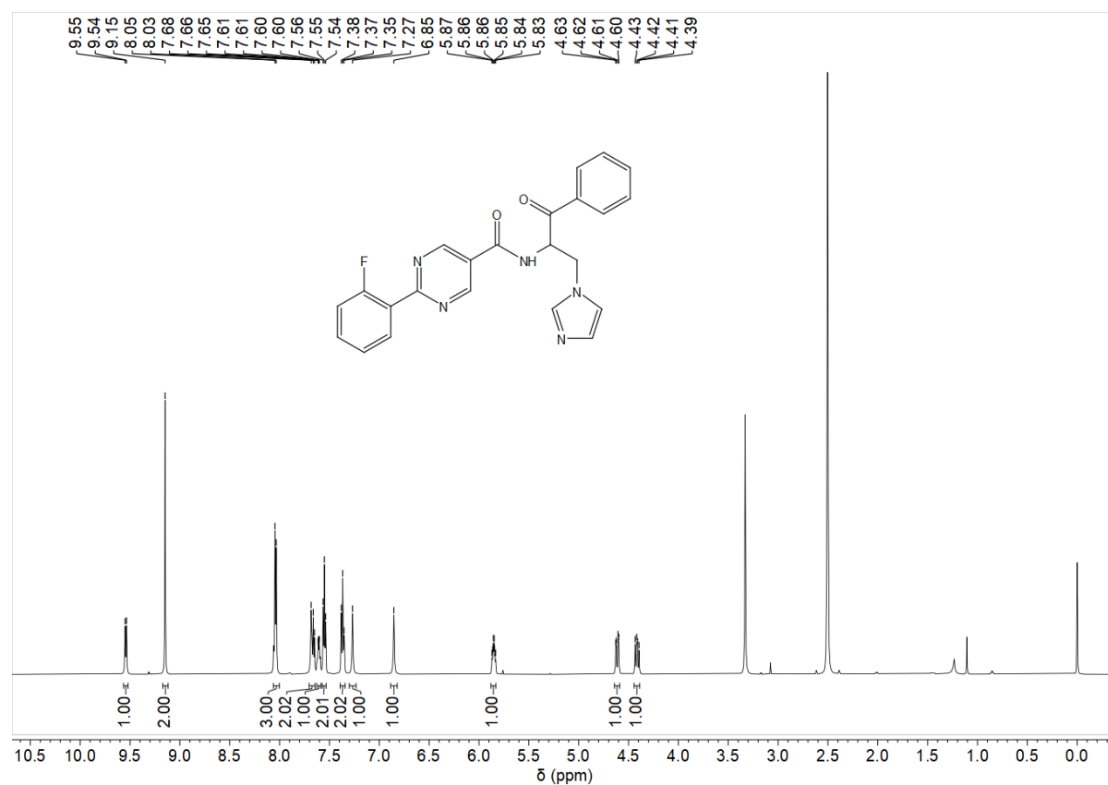

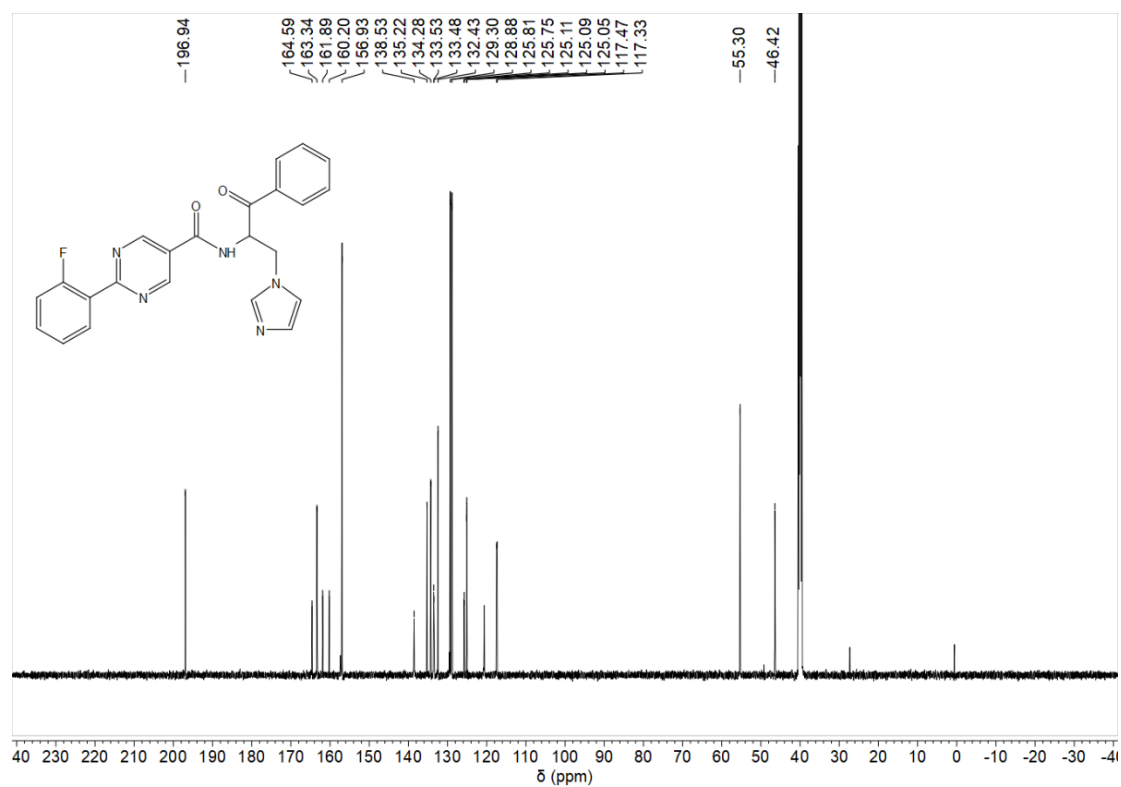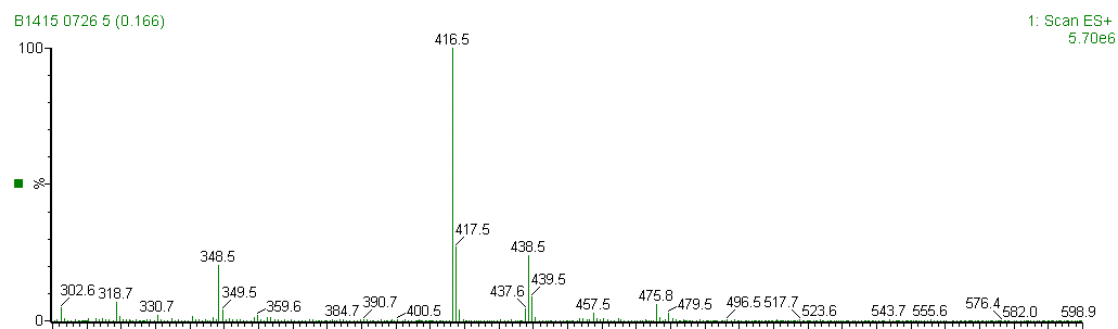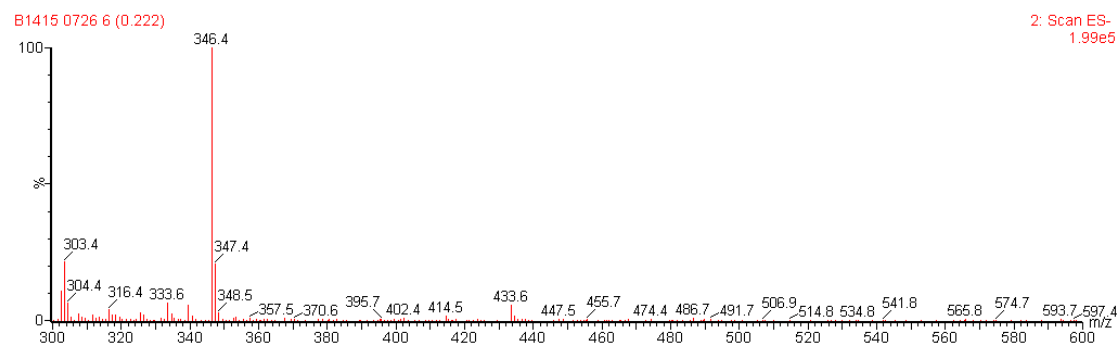

The <sup>1</sup>H-NMR, <sup>13</sup>C NMR and MS spectrum of compound **B13**

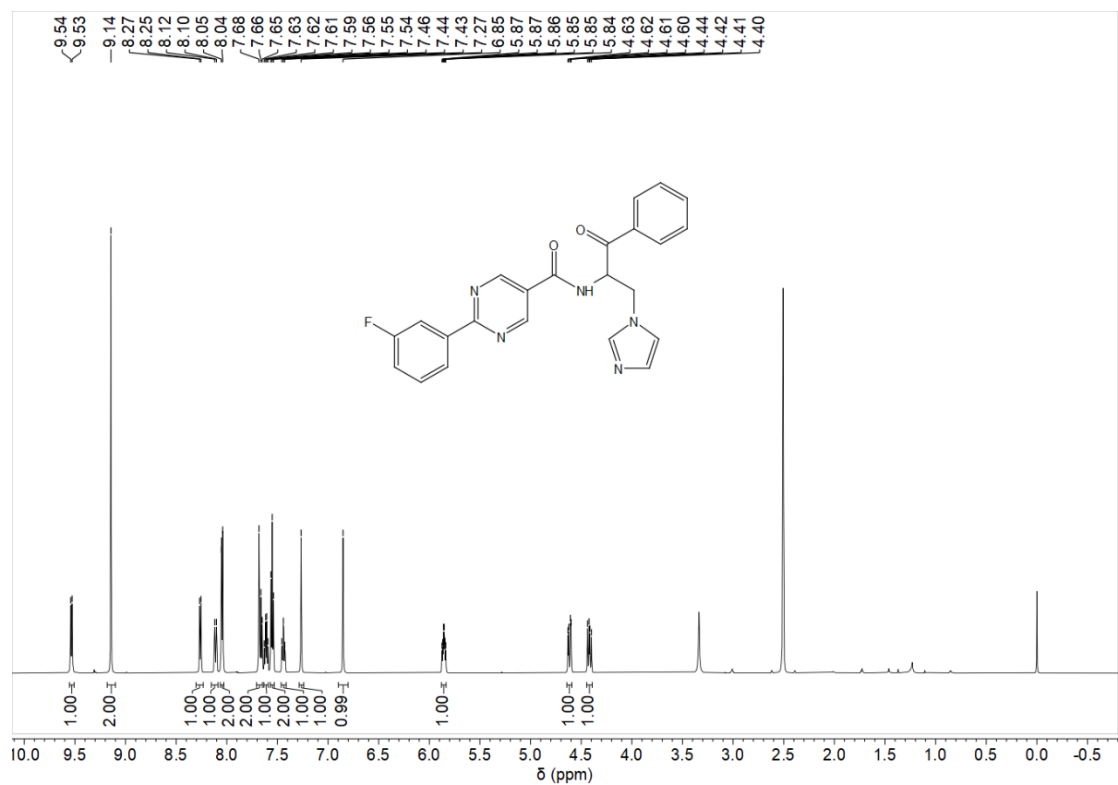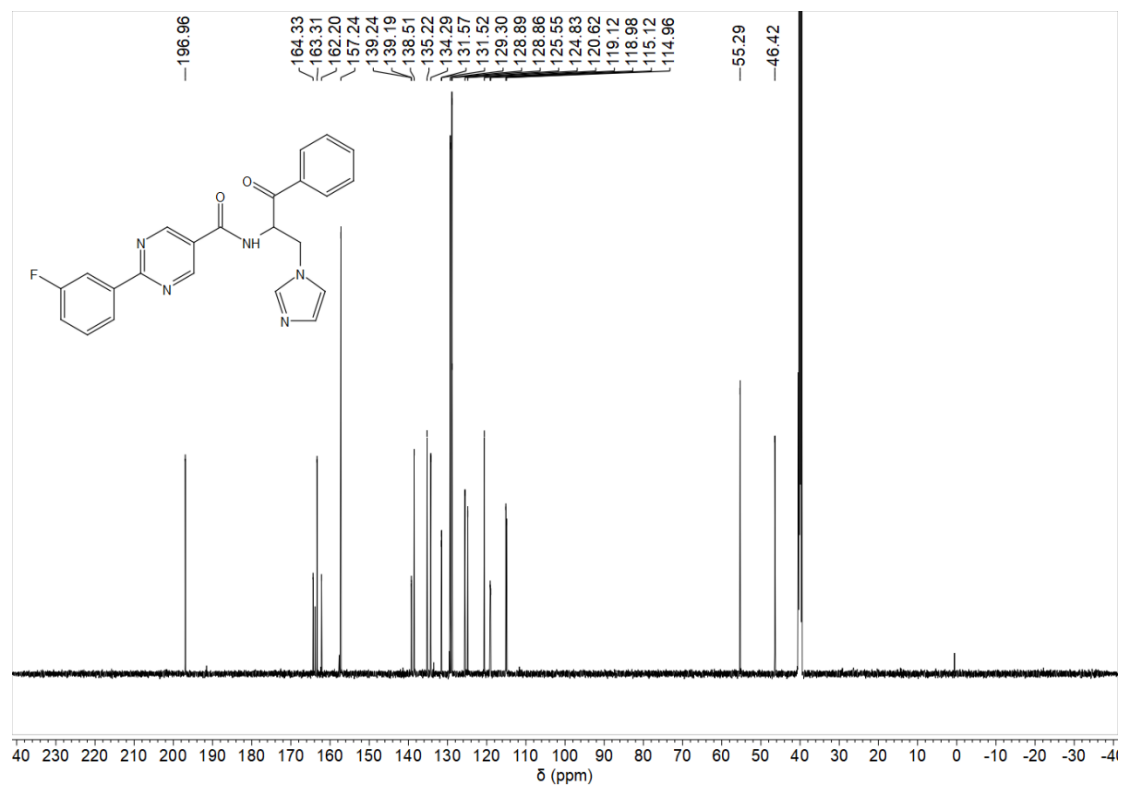

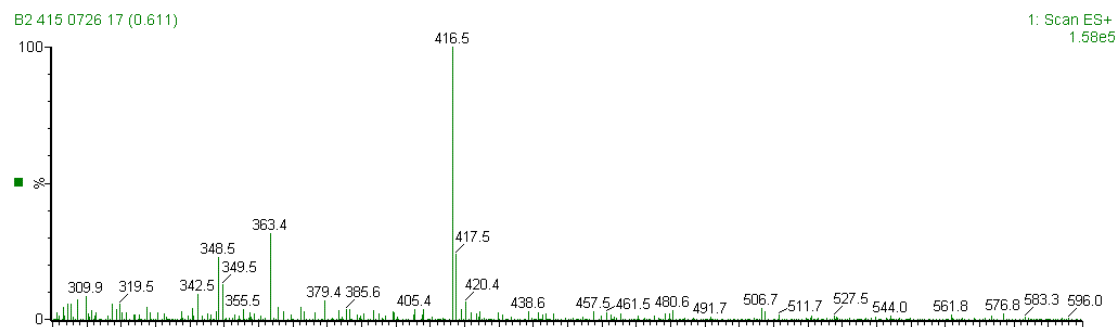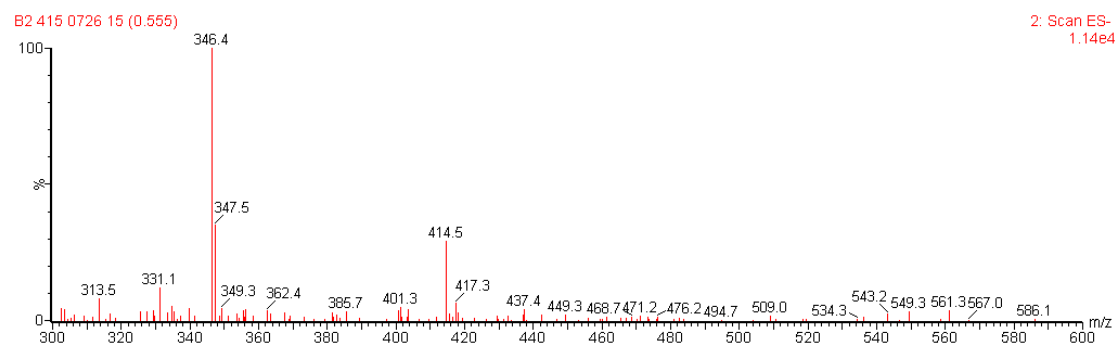

The  $^1\text{H}$ -NMR and MS spectrum of compound **B14**

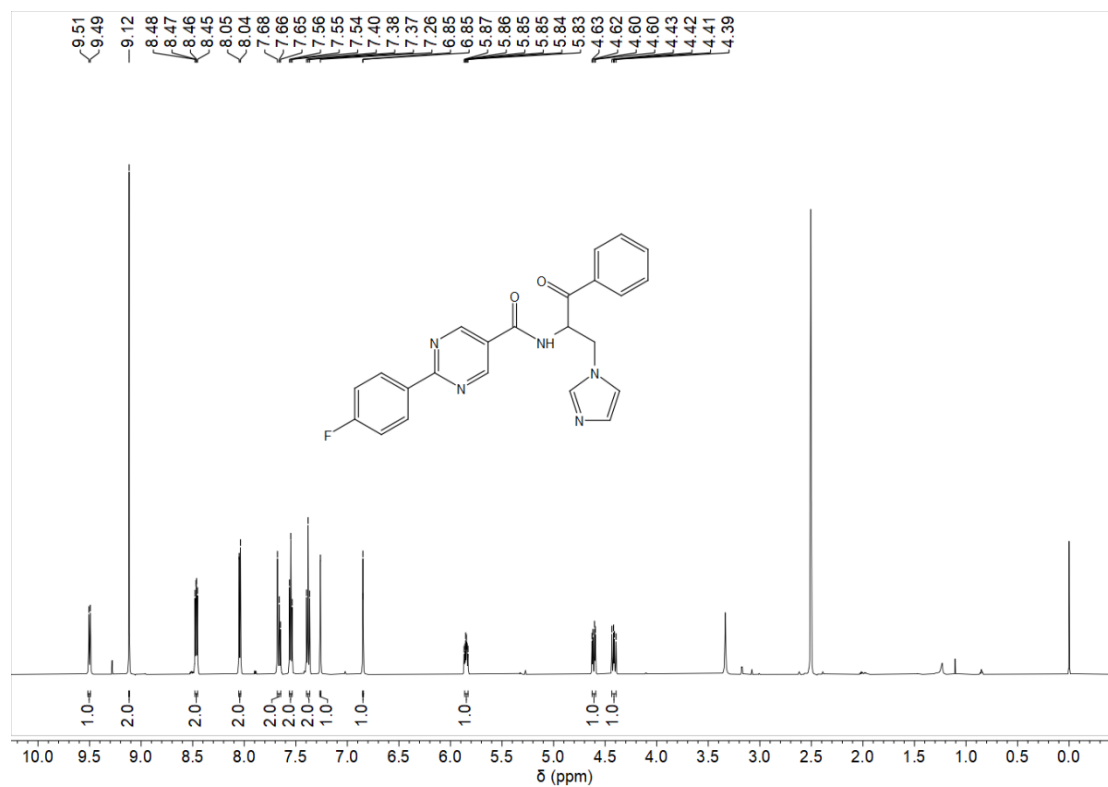

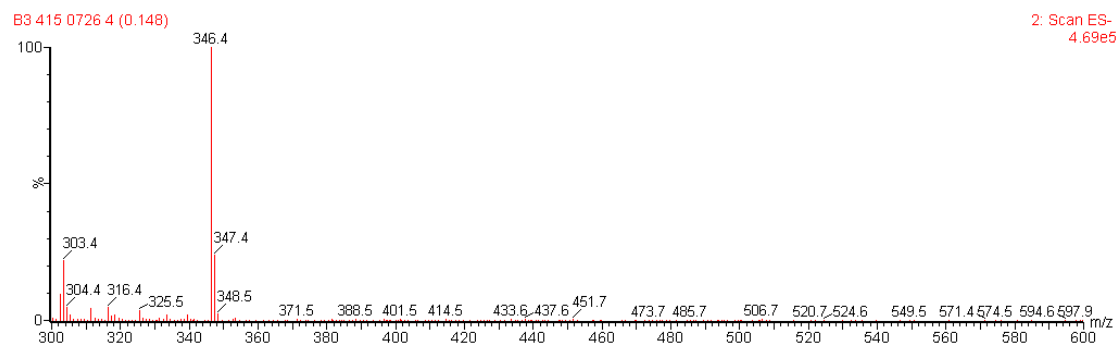

The <sup>1</sup>H-NMR and MS spectrum of compound **B15**

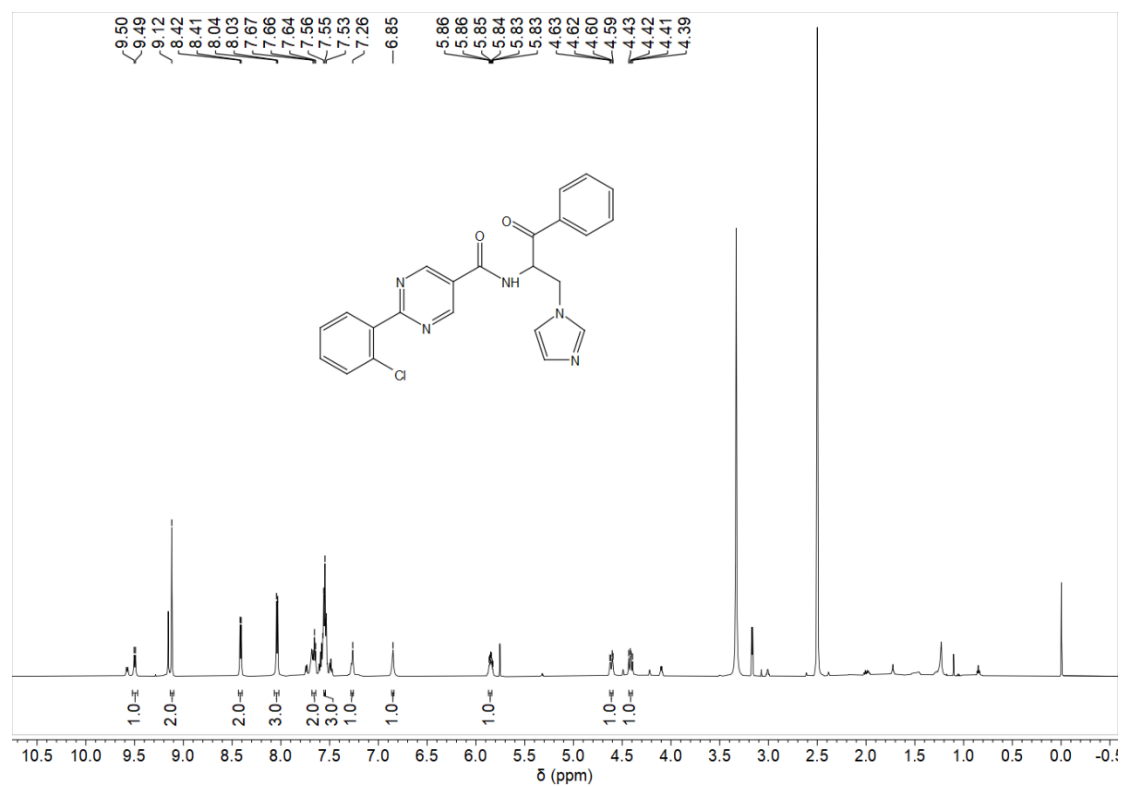

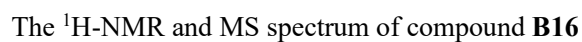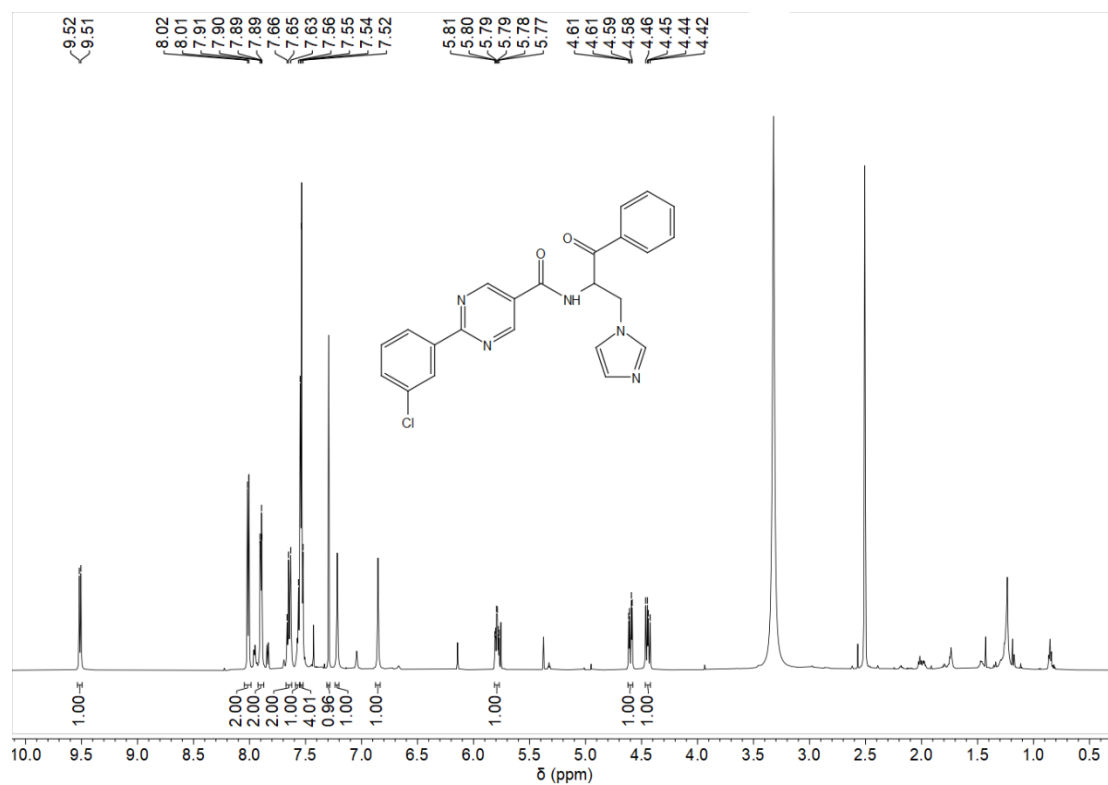

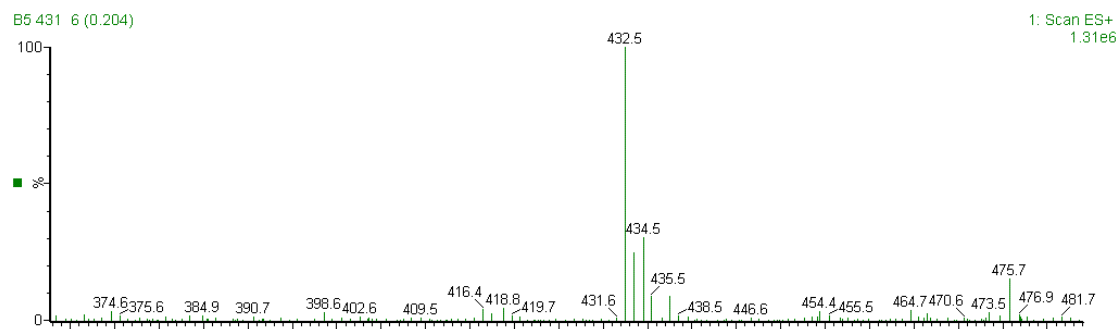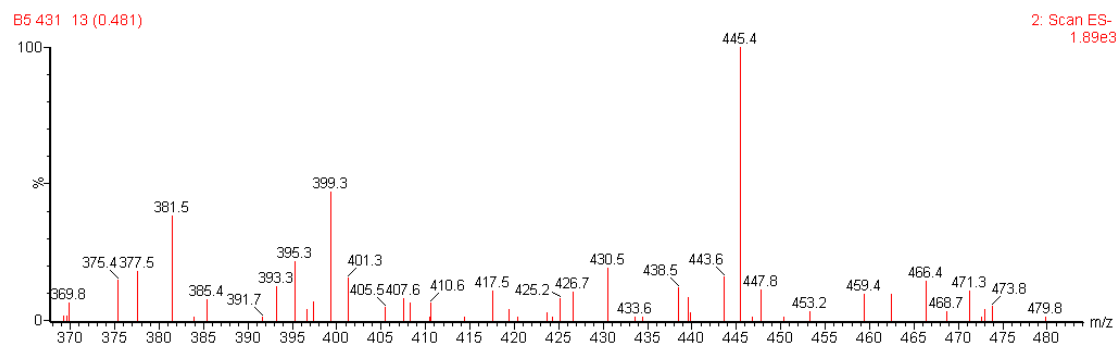

The  $^1\text{H}$ -NMR,  $^{13}\text{C}$  NMR and MS spectrum of compound **B17**

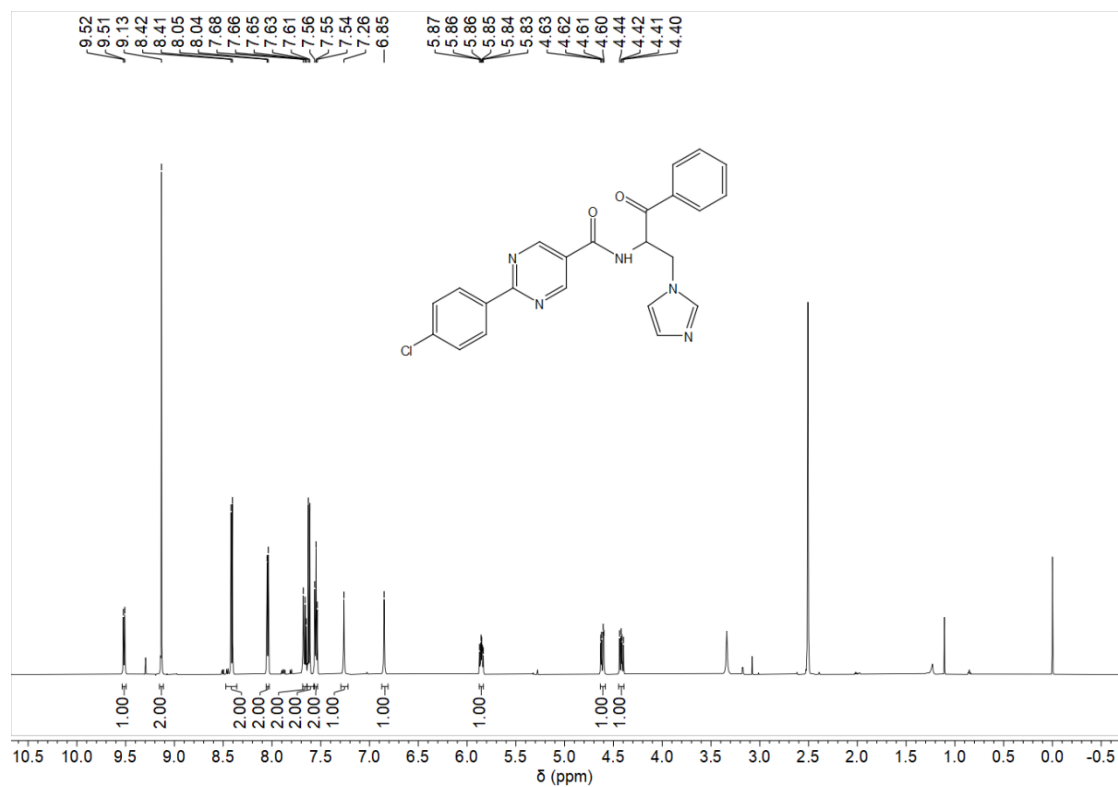

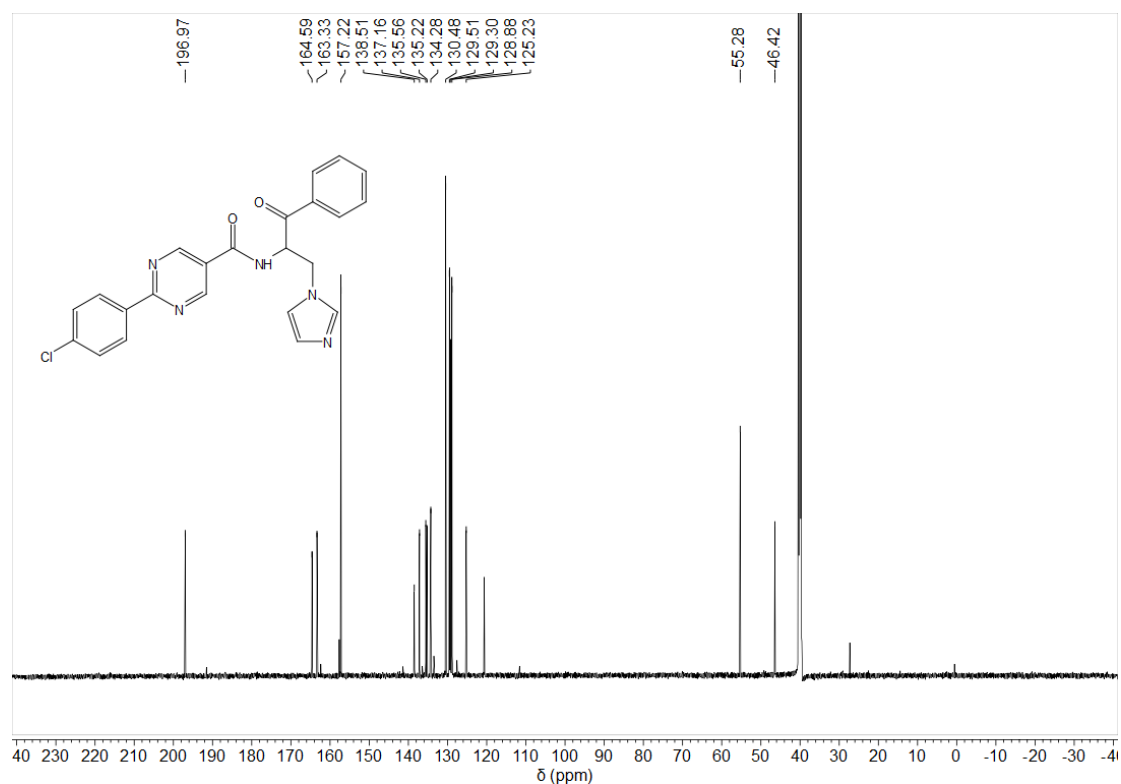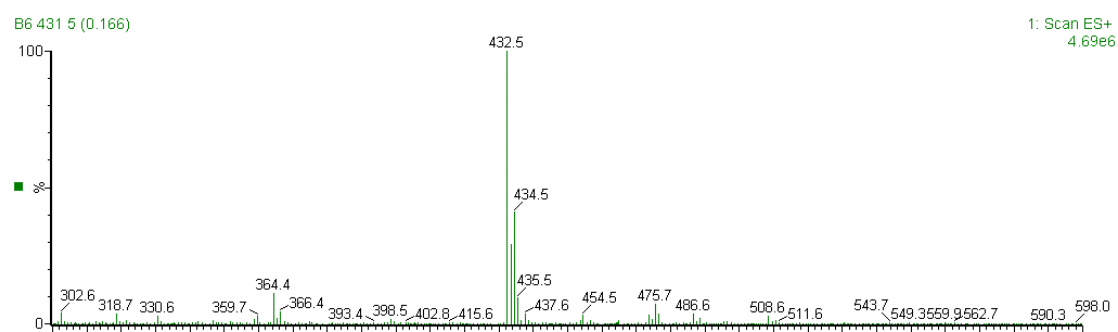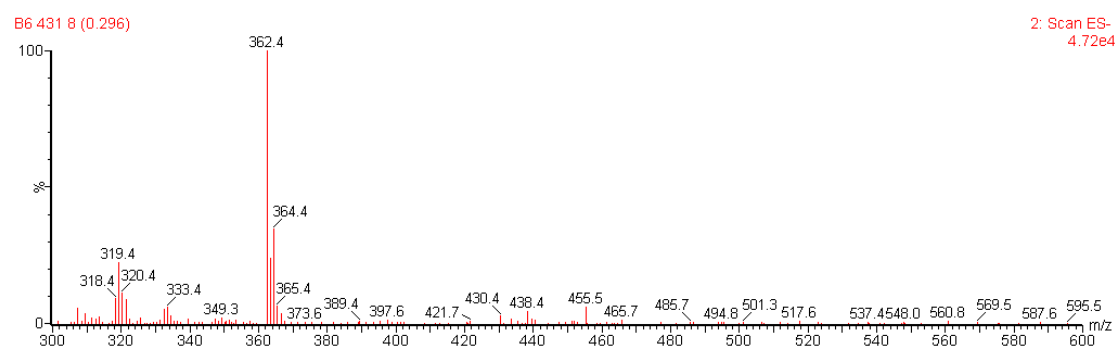

The <sup>1</sup>H-NMR and MS spectrum of compound **B18**

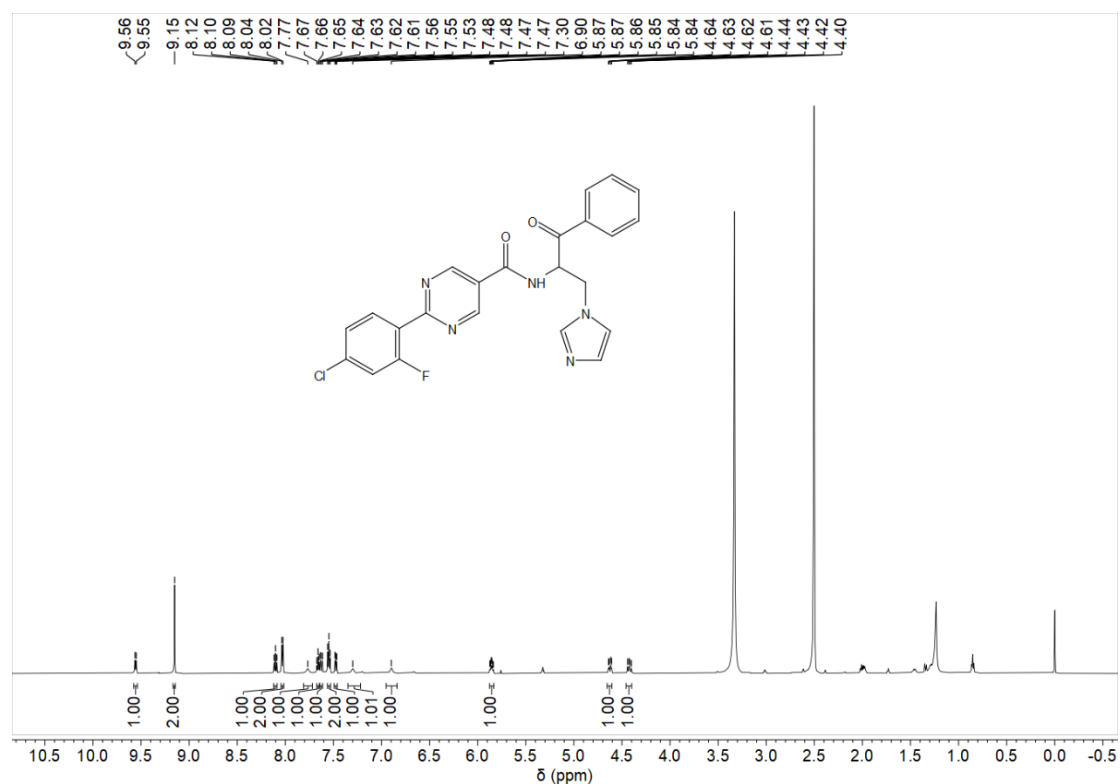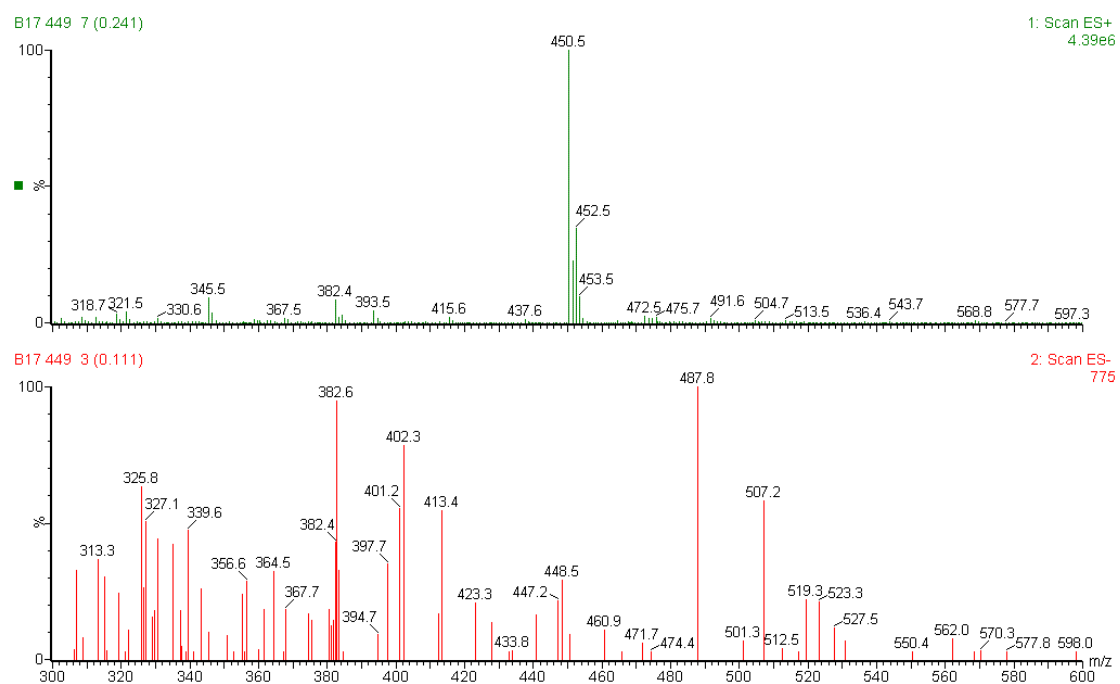

The <sup>1</sup>H-NMR and MS spectrum of compound C1

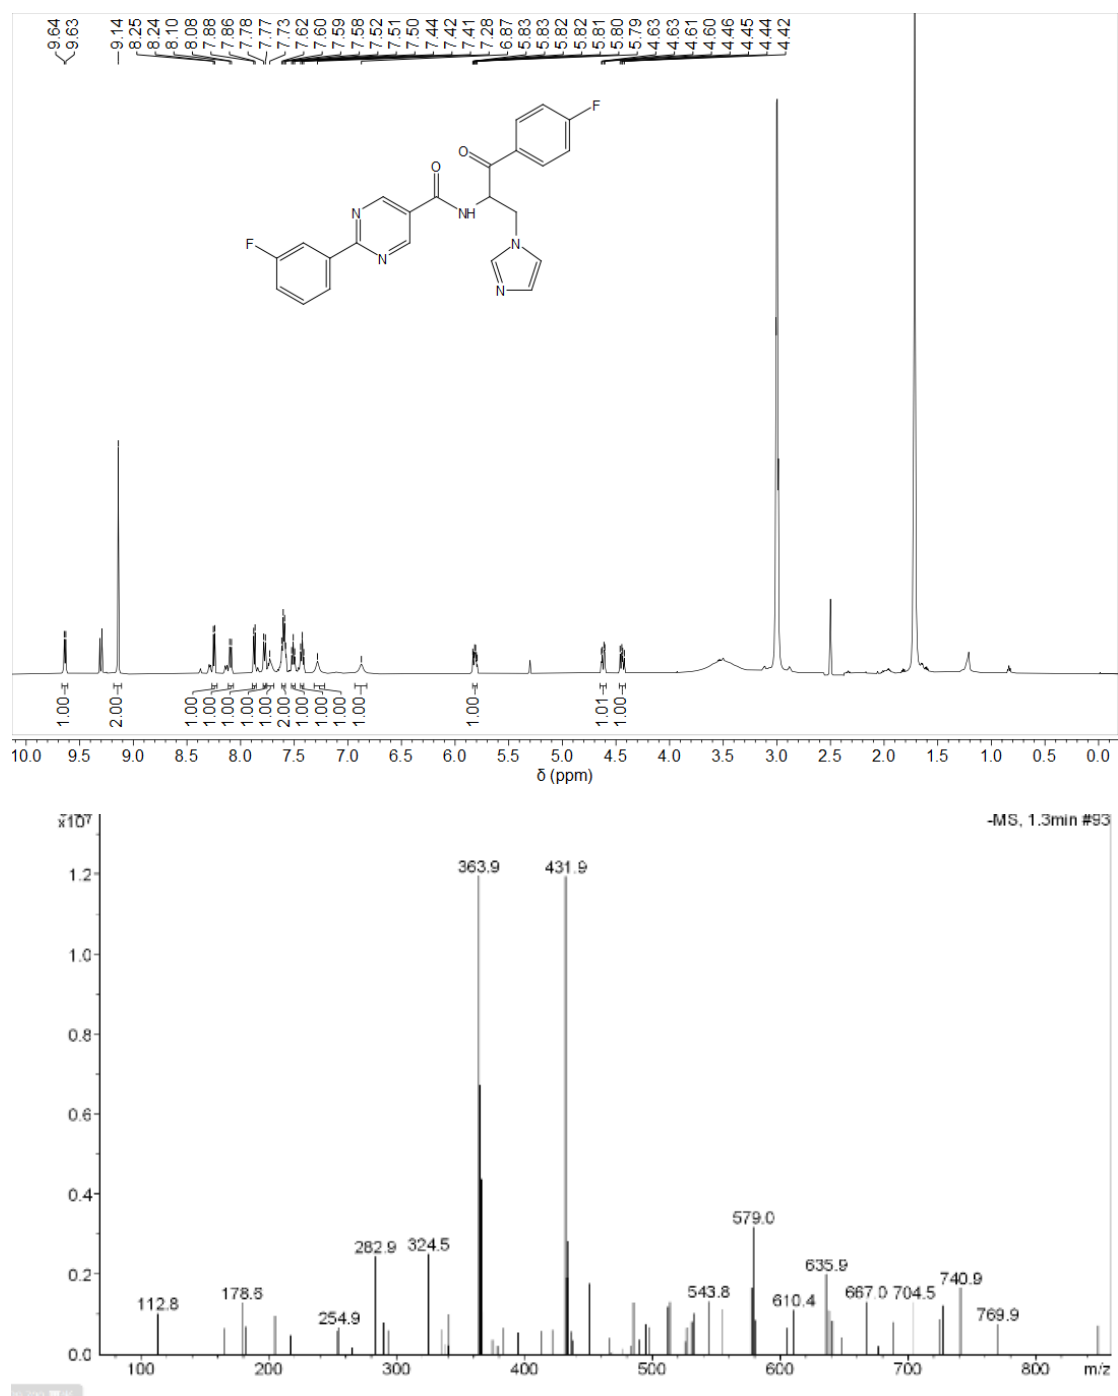

The <sup>1</sup>H-NMR and MS spectrum of compound C2

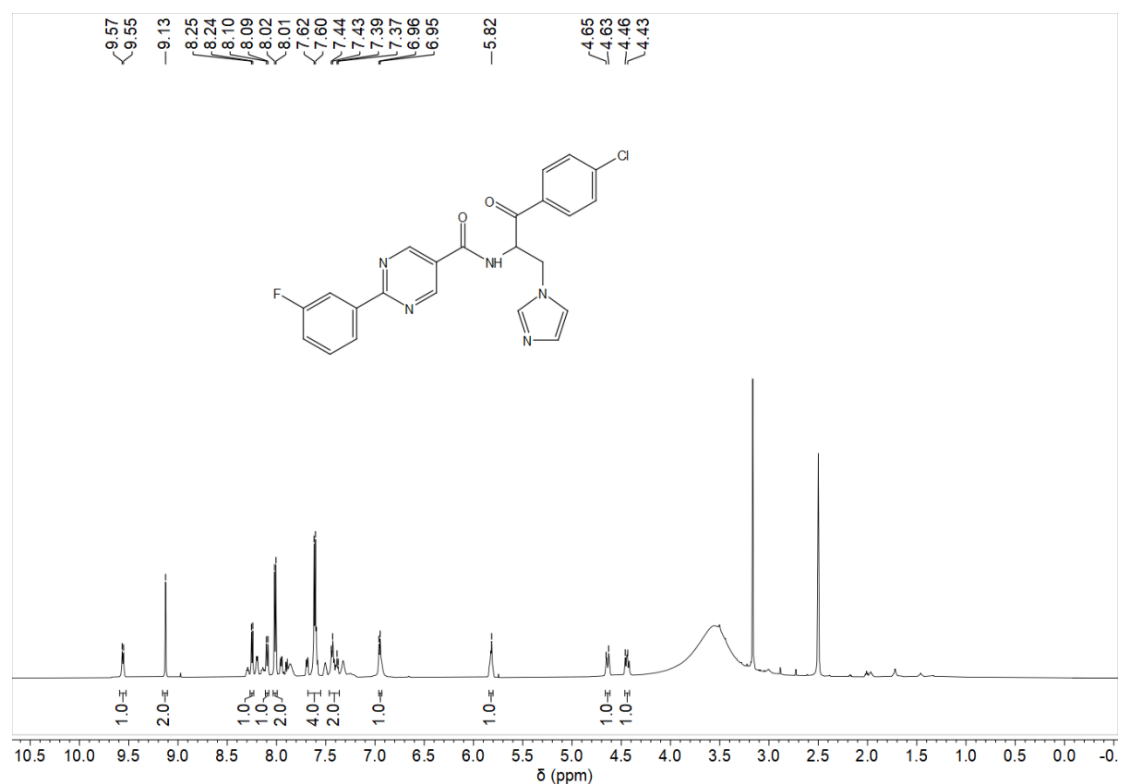

C2 449 14 (0.500) 1: Scan ES+ 3.22e5

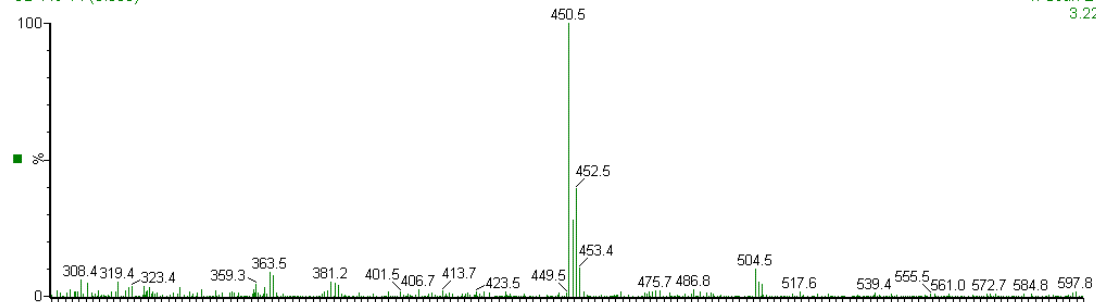

C2 449 3 (0.111) 2: Scan ES- 1.97e3

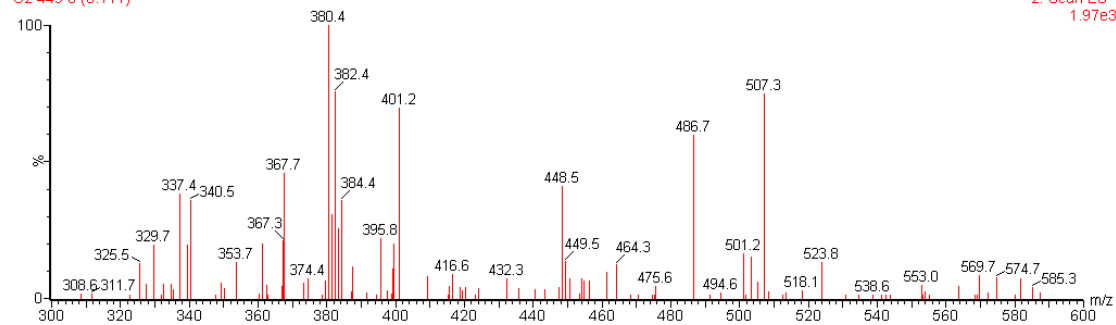

The <sup>1</sup>H-NMR and MS spectrum of compound **C3**

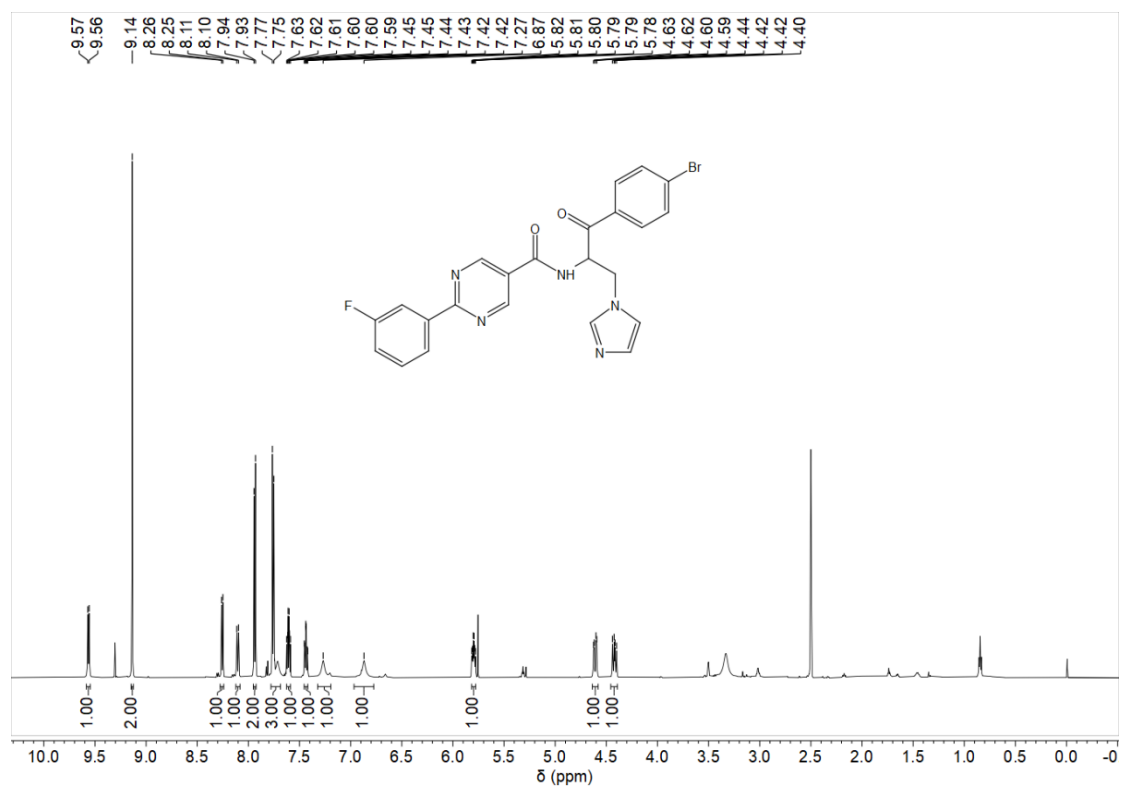

C3 493 11 (0.389) 1: Scan ES+ 4.47e5

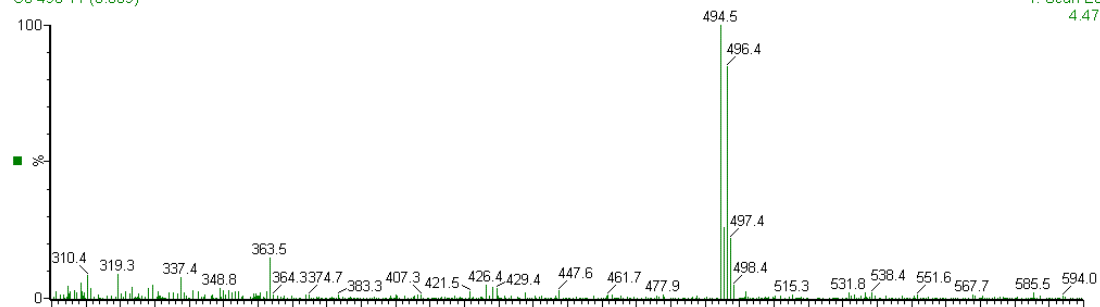

C3 493 11 (0.407) 2: Scan ES- 1.83e4

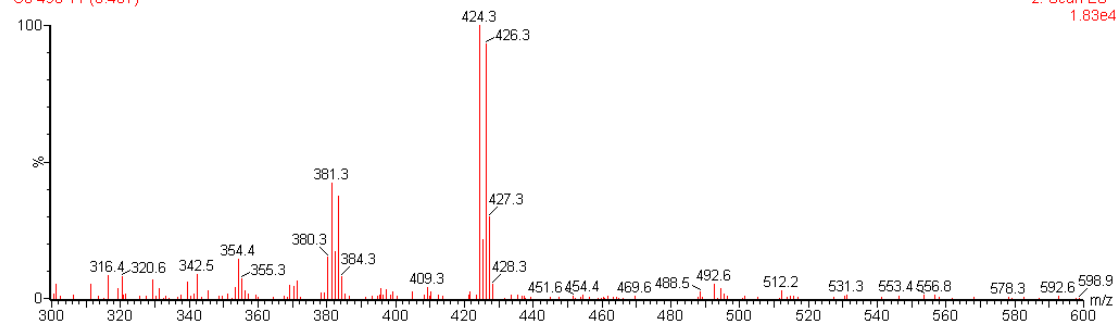

The <sup>1</sup>H-NMR and MS spectrum of compound C4

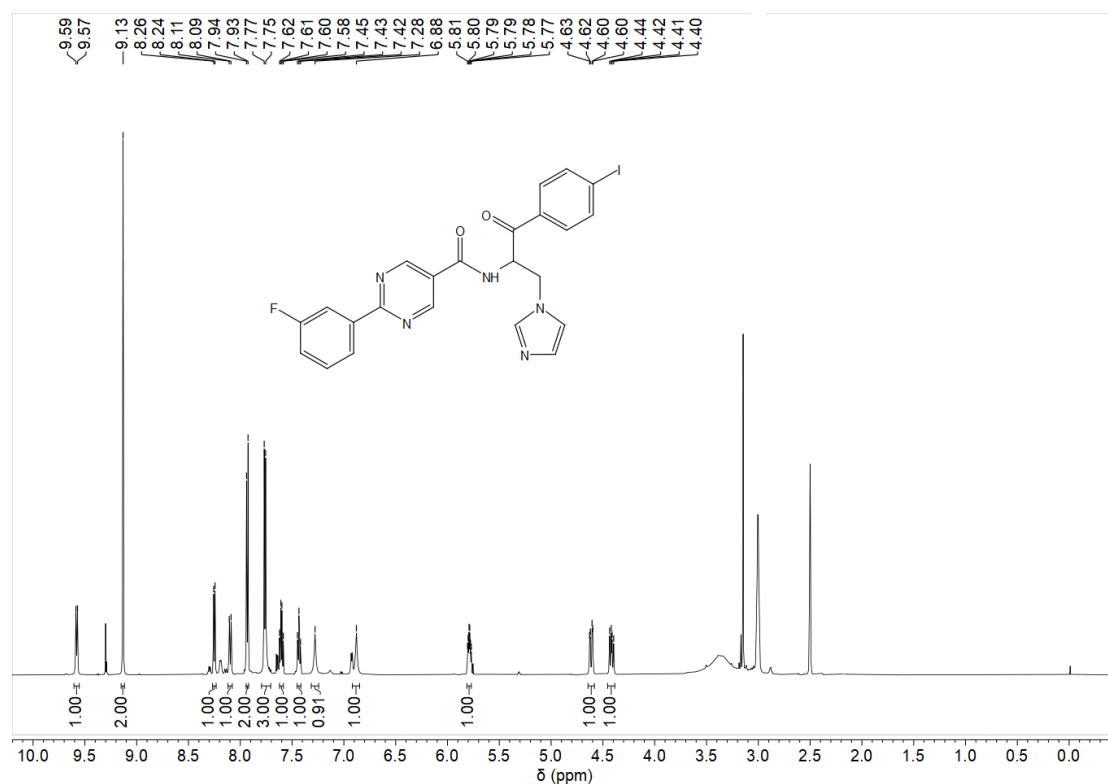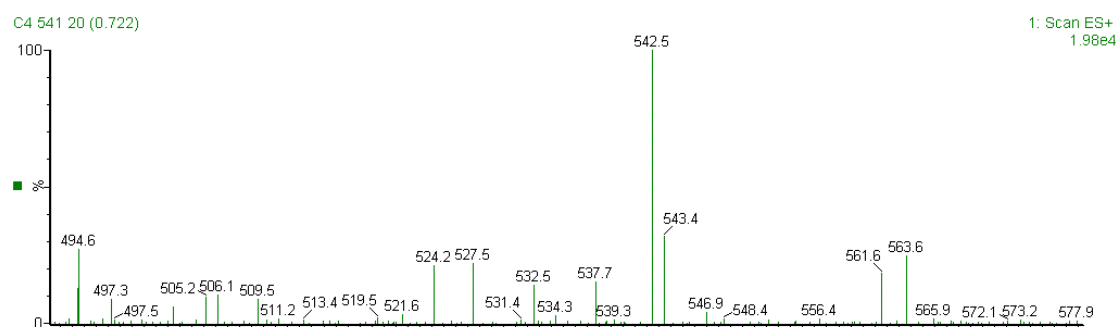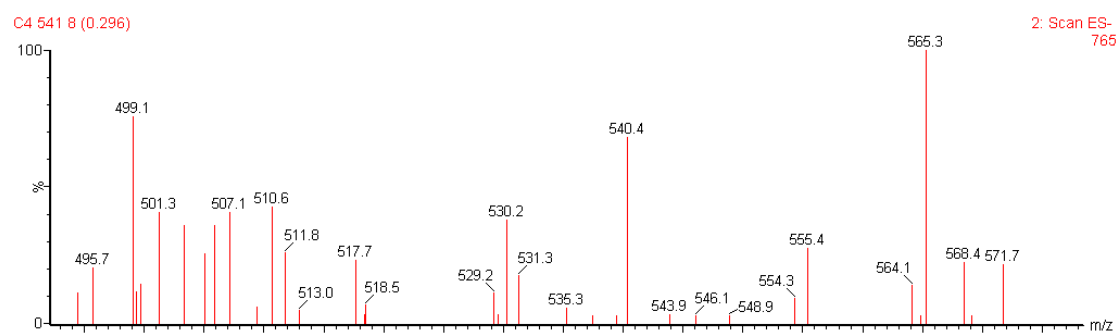

The <sup>1</sup>H-NMR and MS spectrum of compound C5

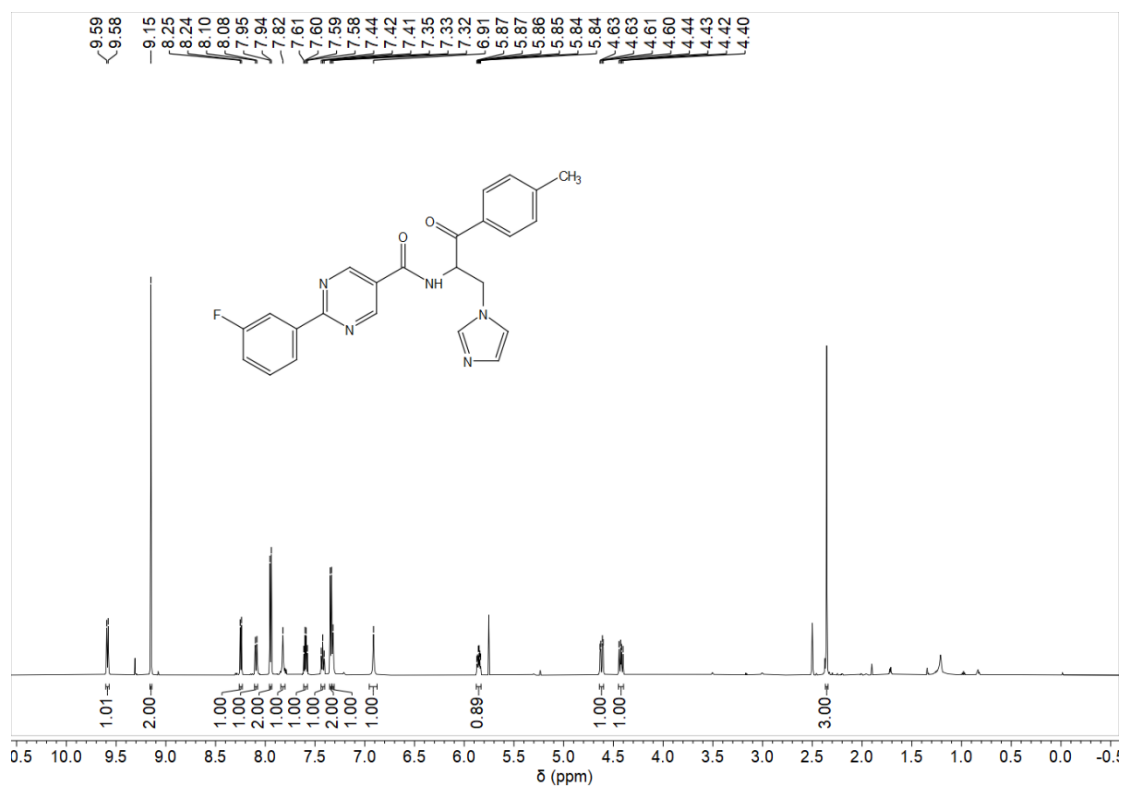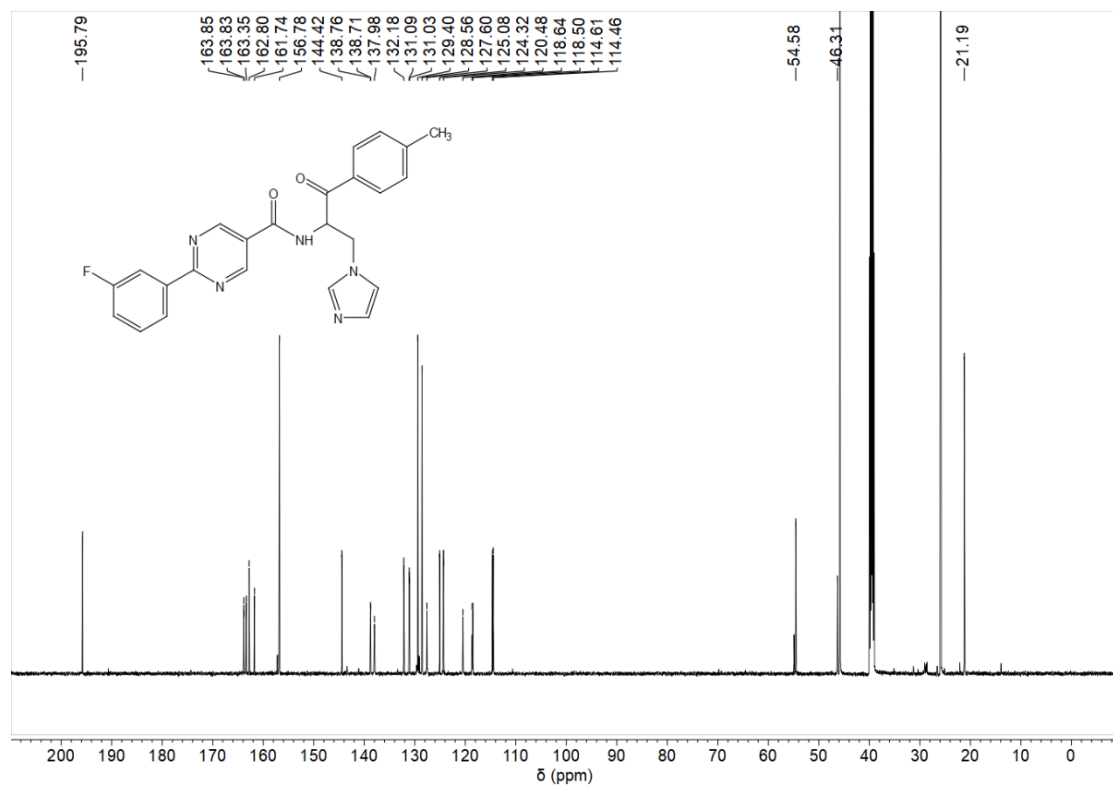

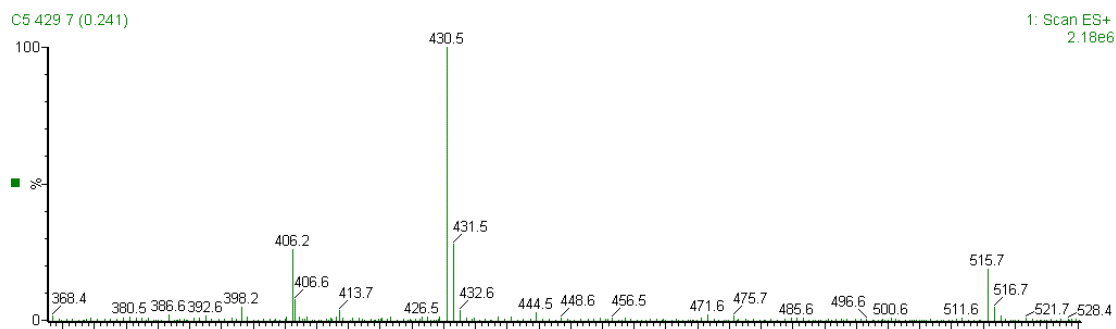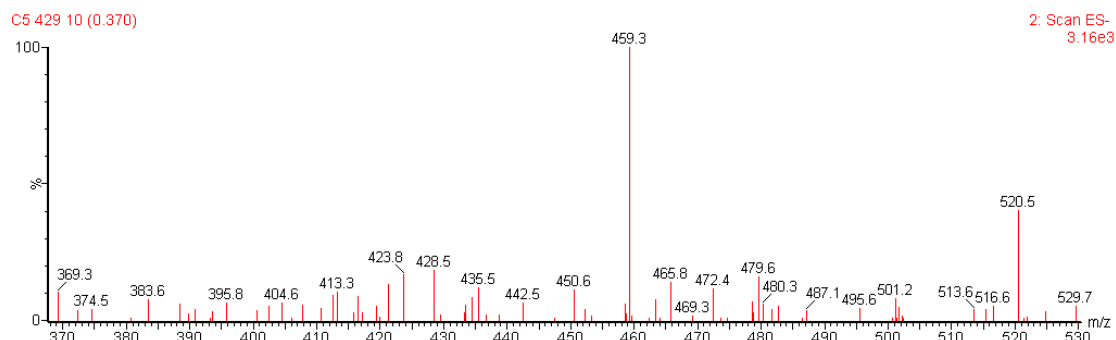

The  $^1\text{H}$ -NMR,  $^{13}\text{C}$  NMR and MS spectrum of compound C6

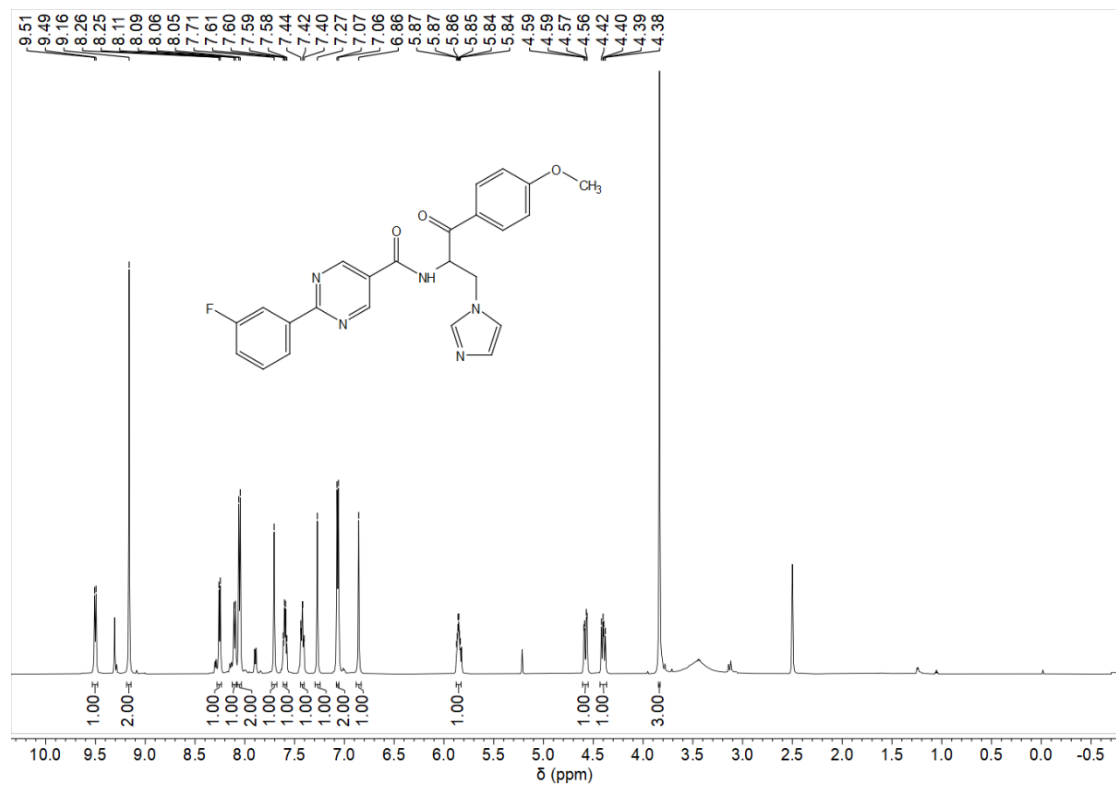

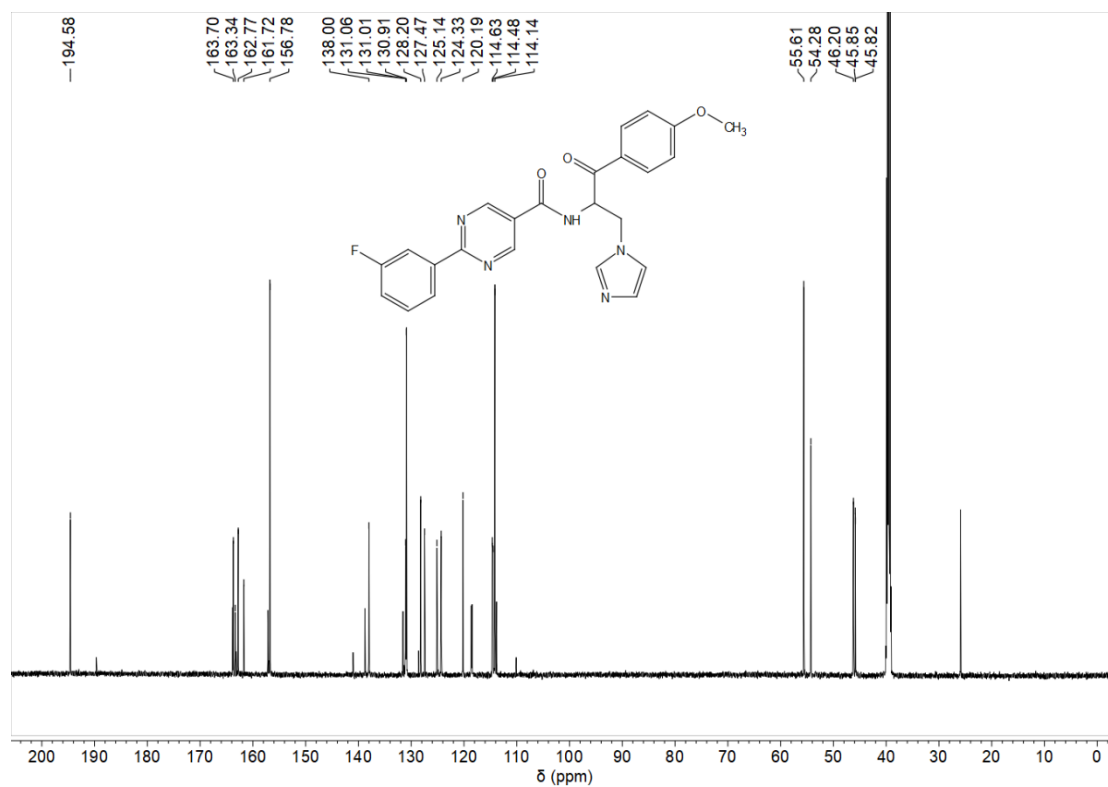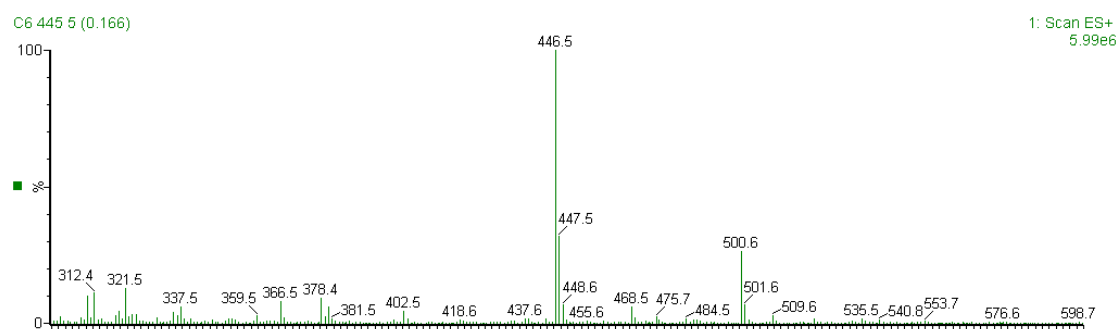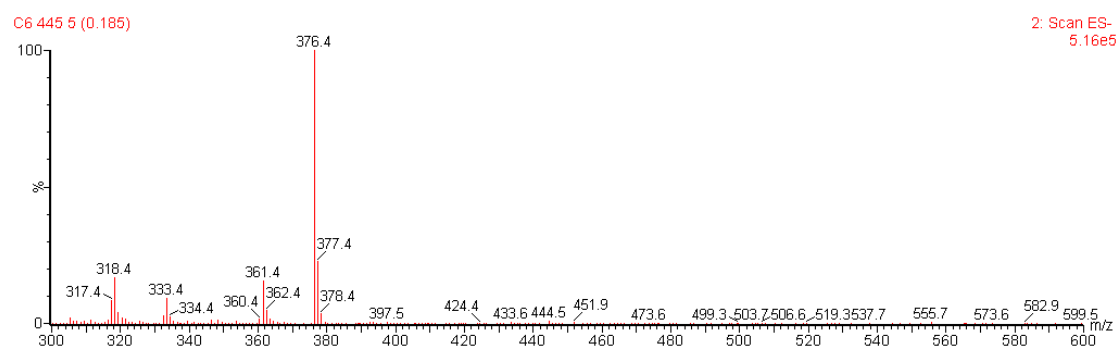

### HRMS spectra of A1

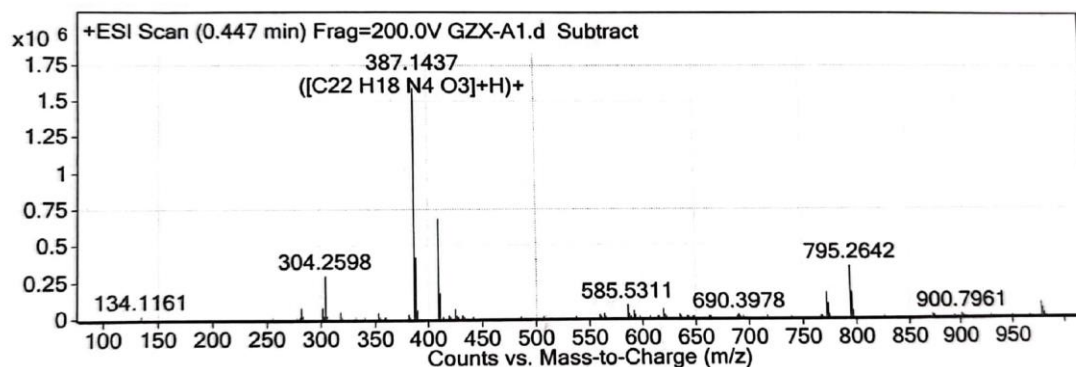

### HRMS spectra of A2

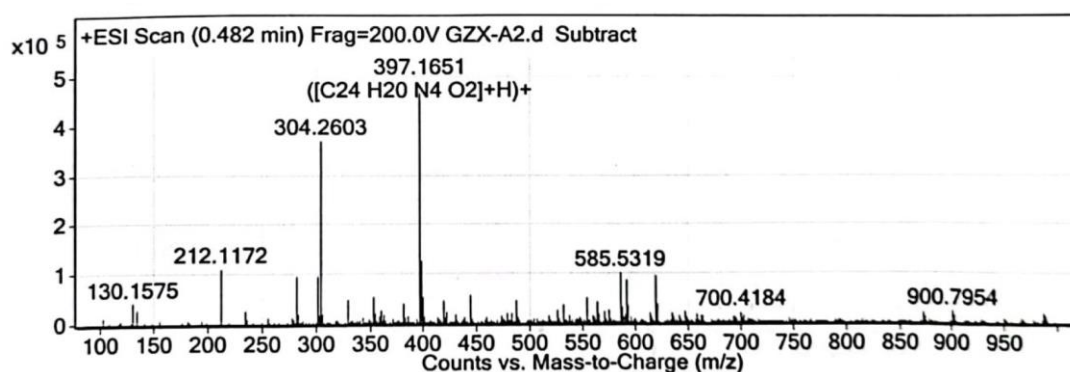

### HRMS spectra of A3

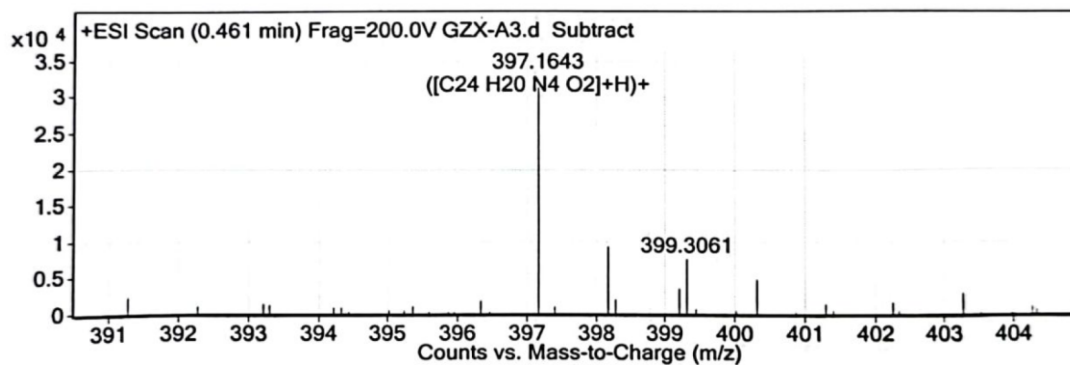

### HRMS spectra of A4

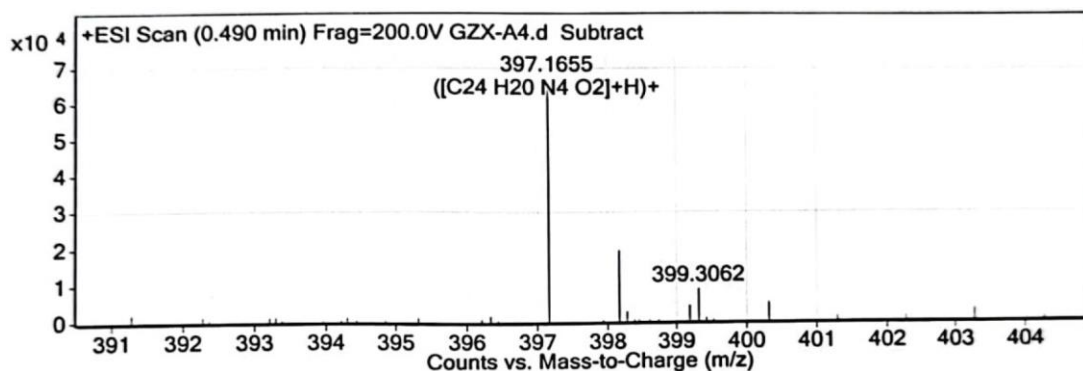

### HRMS spectra of A5

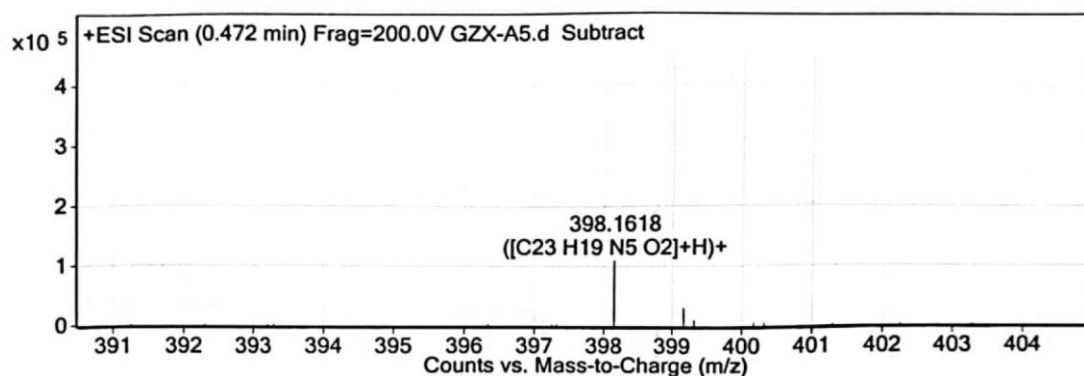

### HRMS spectra of A6

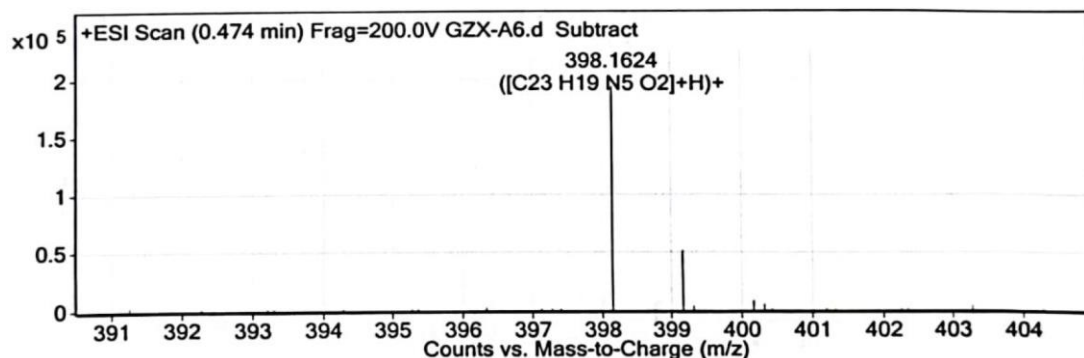

### HRMS spectra of A7

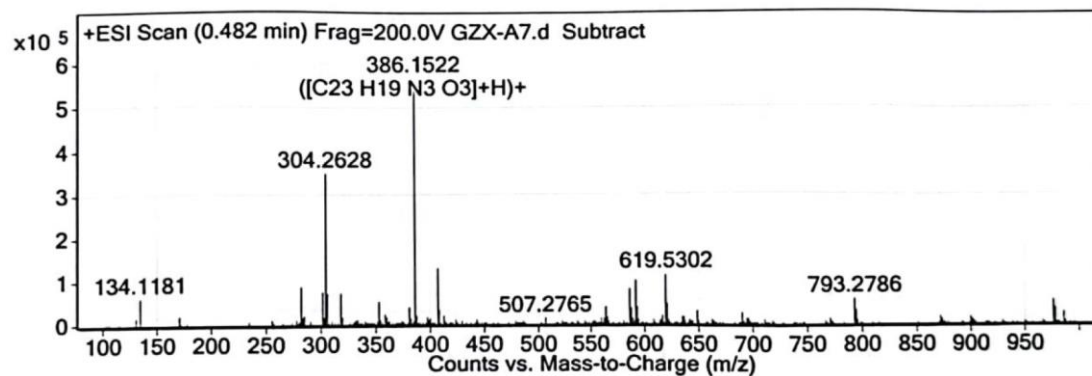

### HRMS spectra of A8

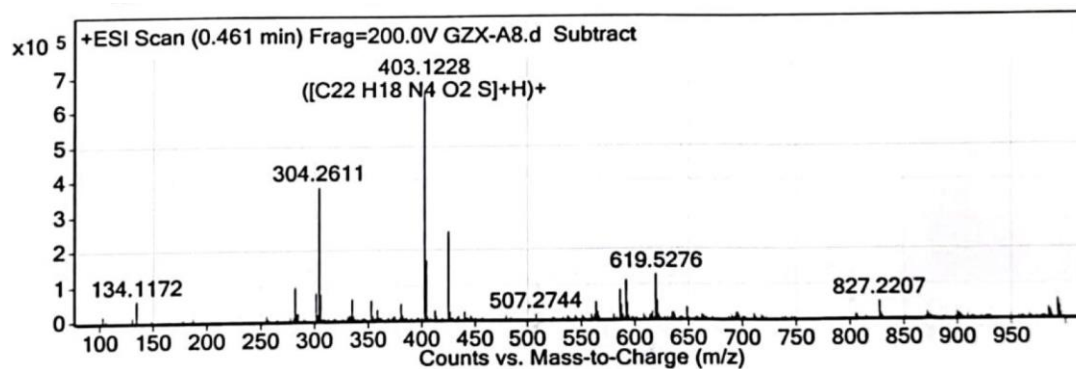

### HRMS spectra of **A9**

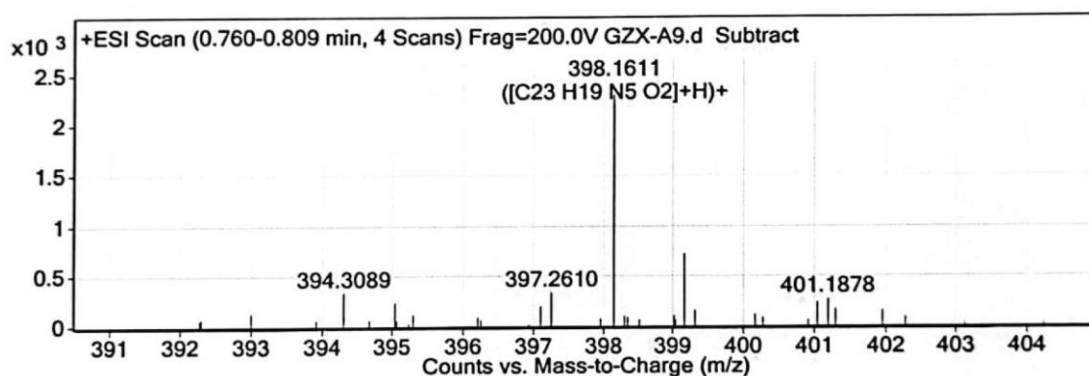

### HRMS spectra of **B1**

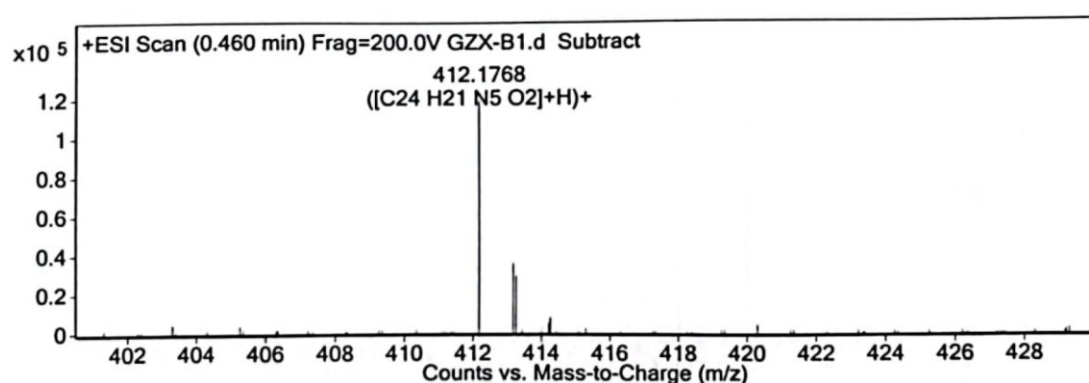

### HRMS spectra of **B2**

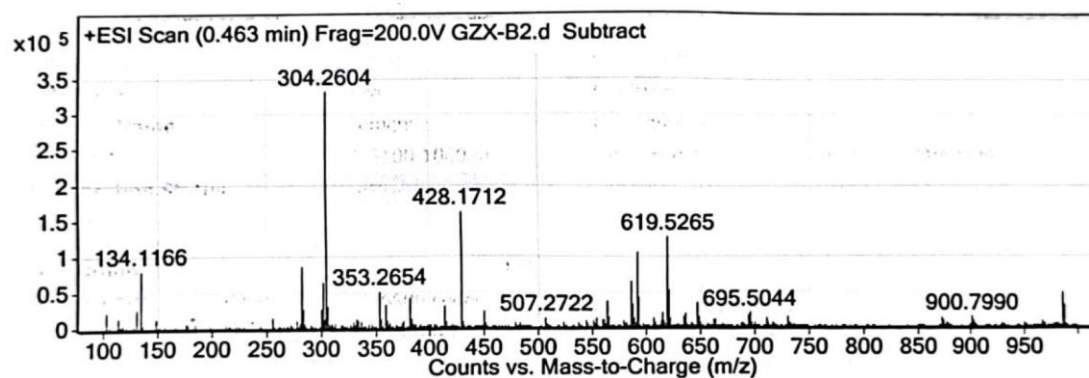

### HRMS spectra of **B3**

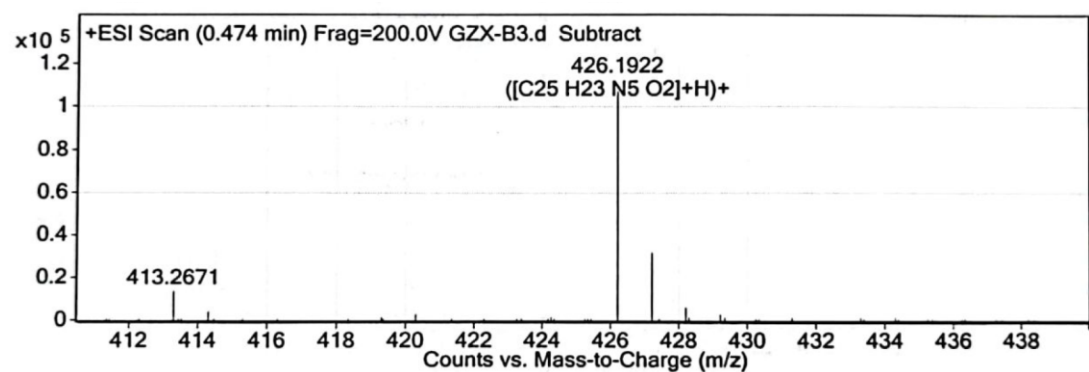

# HRMS spectra of **B4**

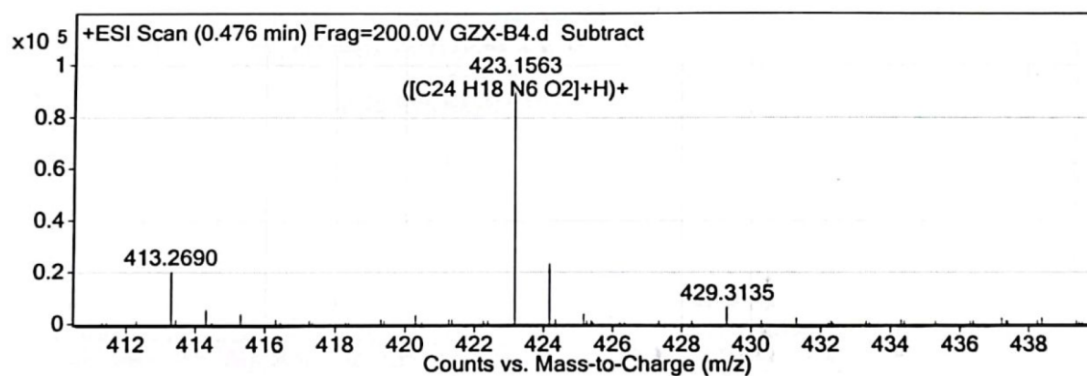

# HRMS spectra of **B5**

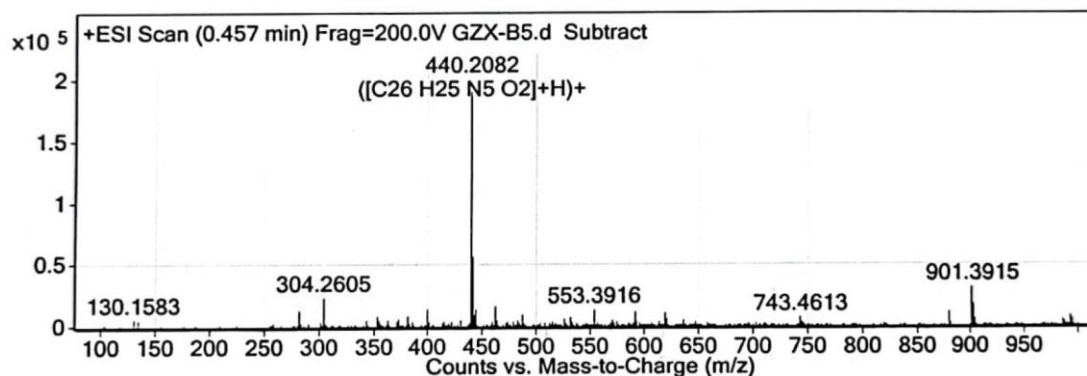

# HRMS spectra of **B6**

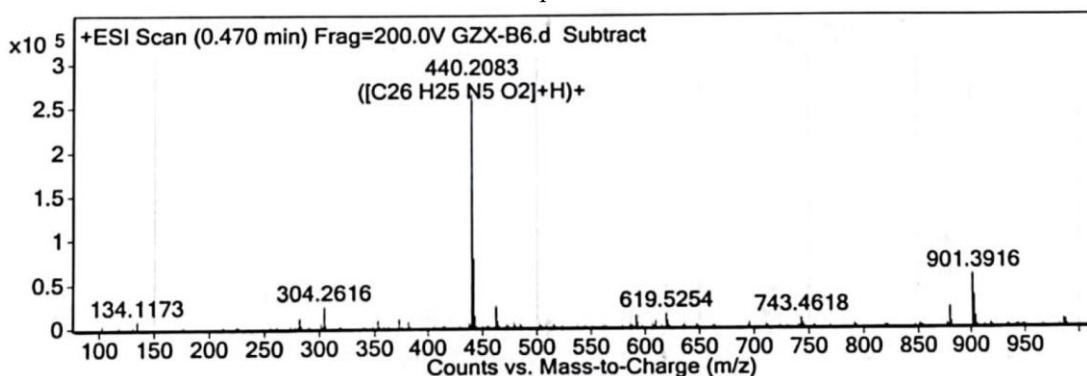

# HRMS spectra of **B7**

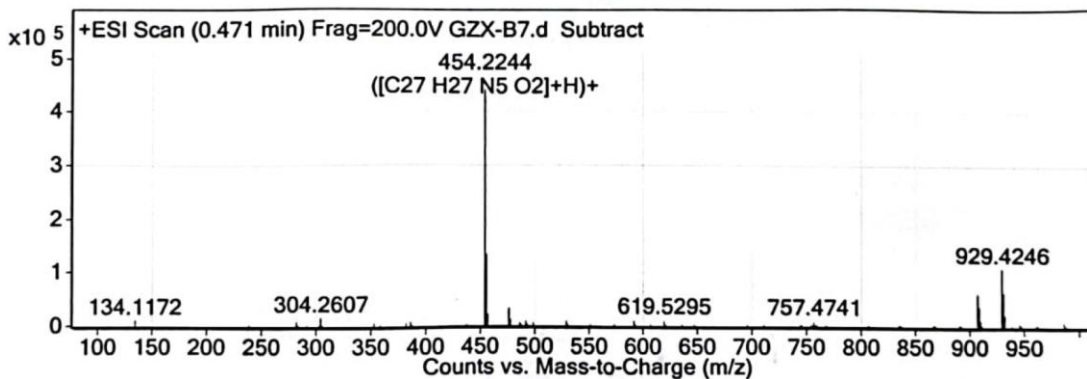

### HRMS spectra of **B8**

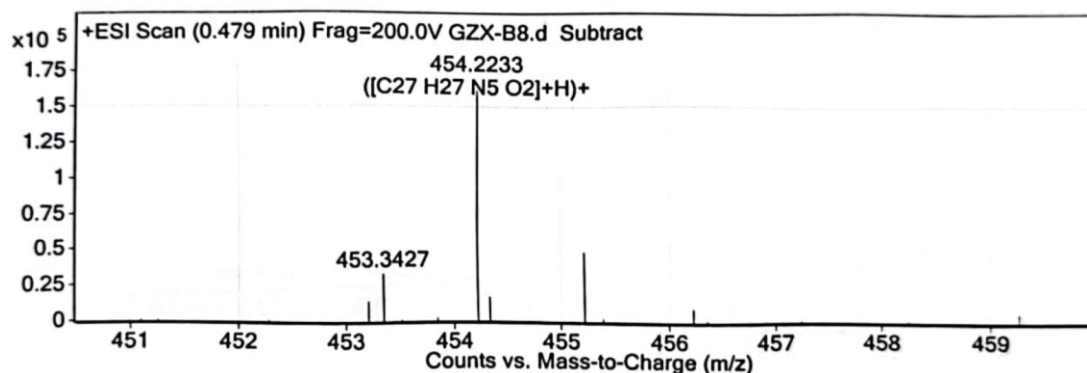

### HRMS spectra of **B9**

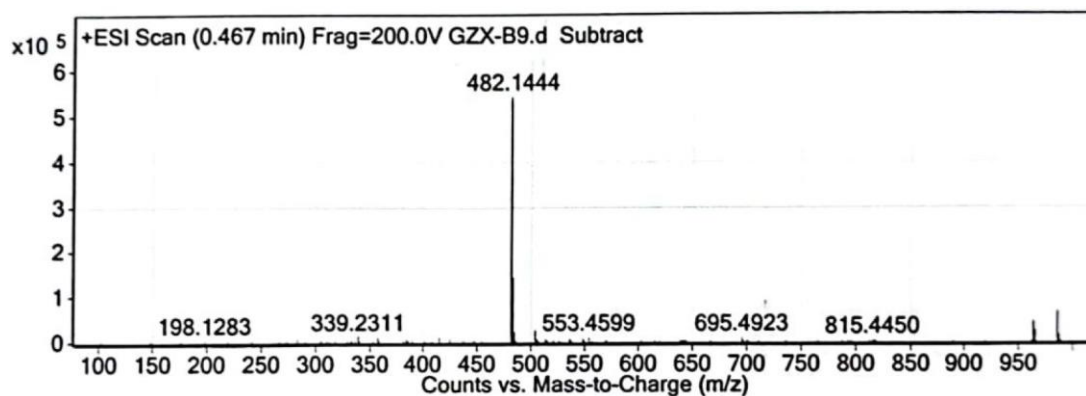

### HRMS spectra of **B10**

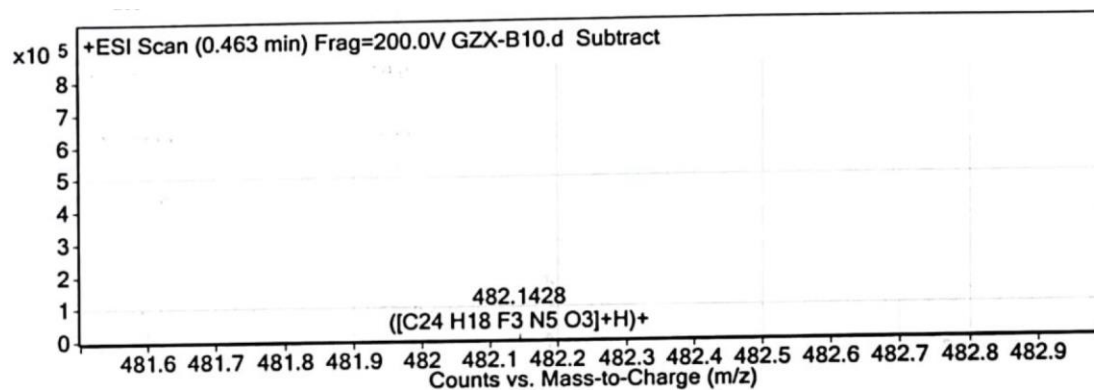

### HRMS spectra of **B11**

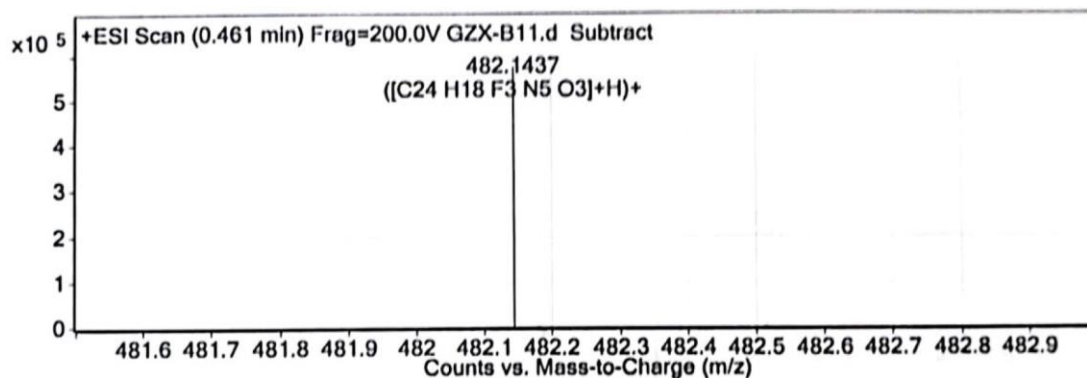

HRMS spectra of **B12**

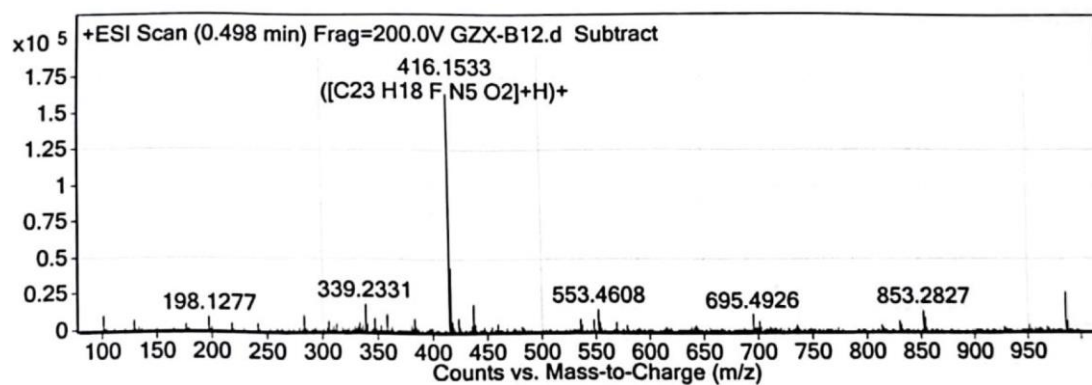

HRMS spectra of **B13**

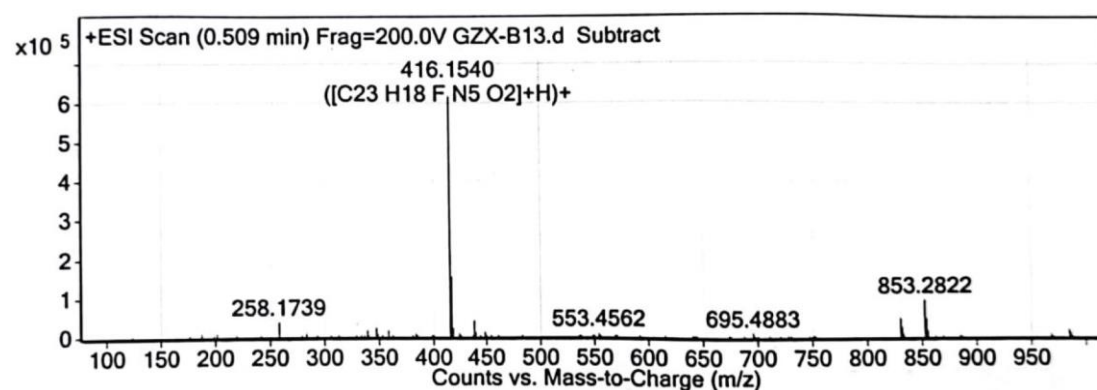

HRMS spectra of **B14**

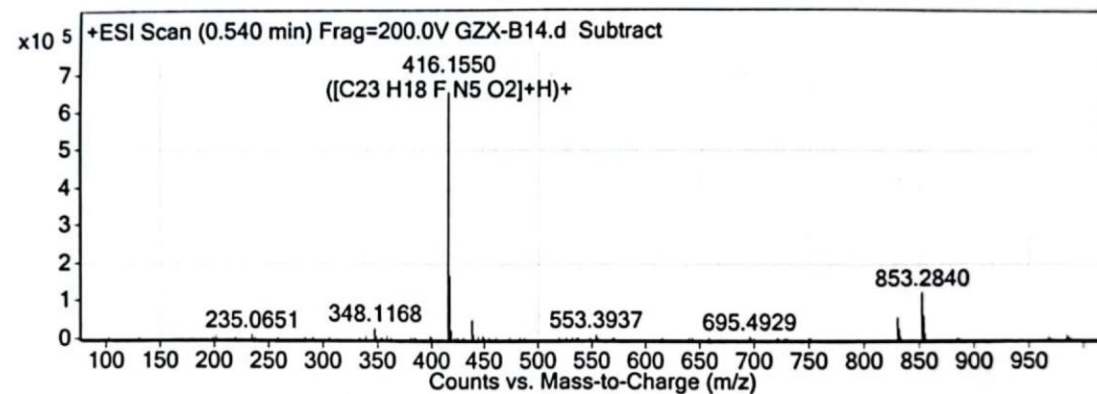

HRMS spectra of **B15**

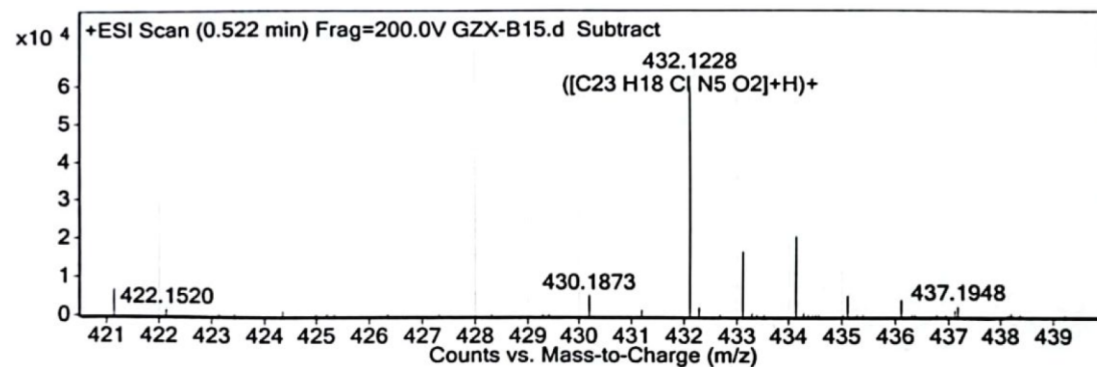

### HRMS spectra of **B16**

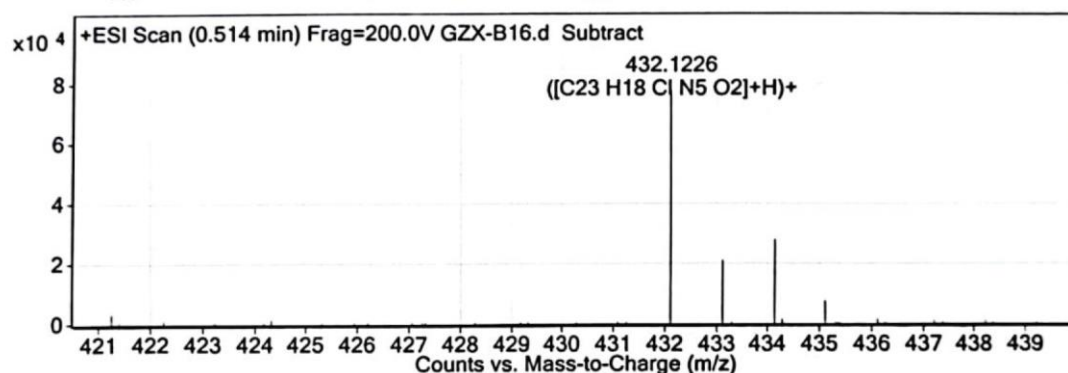

### HRMS spectra of **B17**

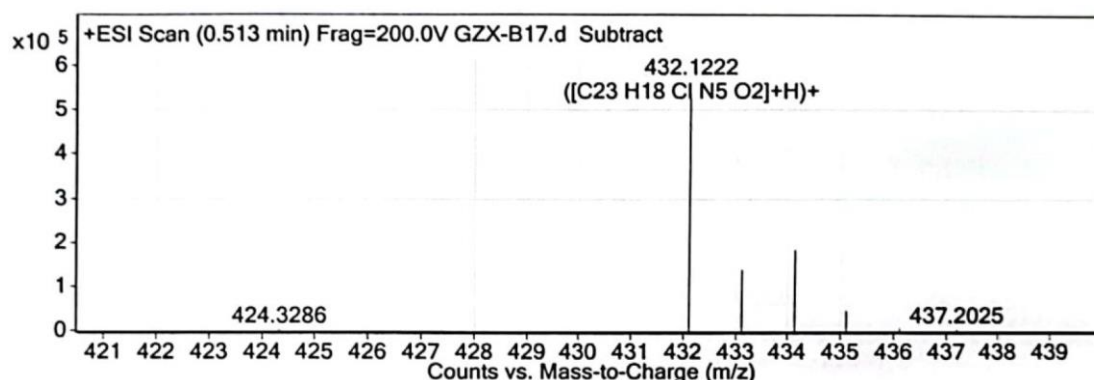

### HRMS spectra of **B18**

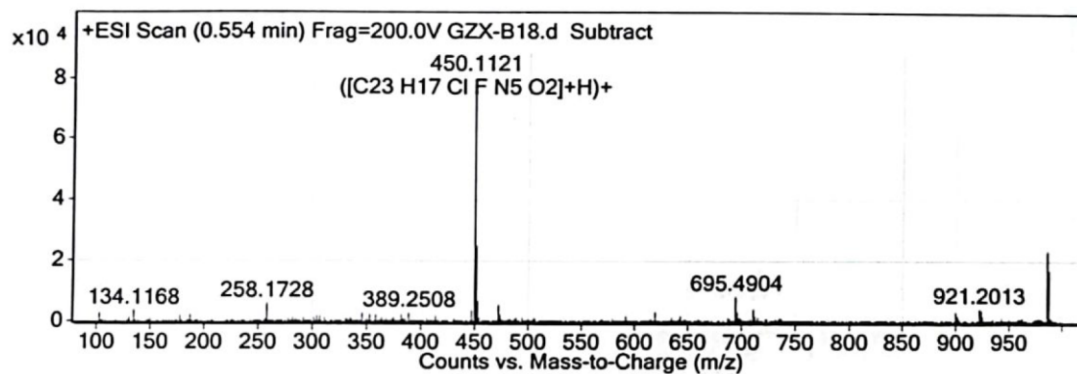

### HRMS spectra of **C1**

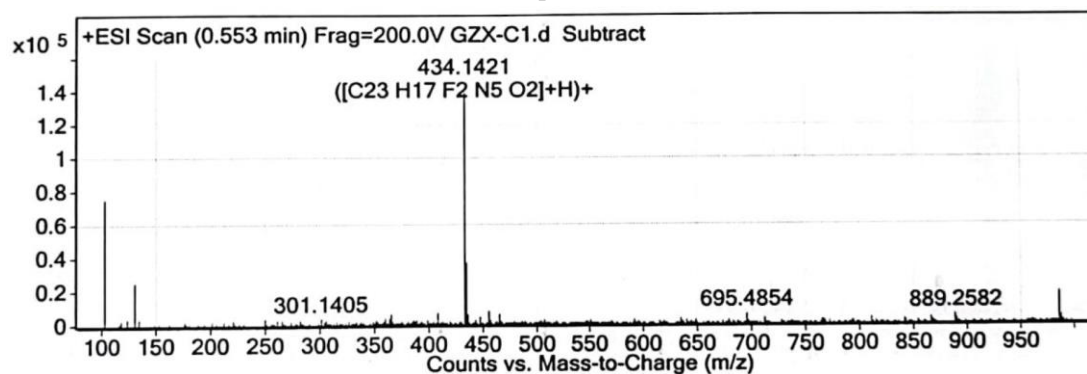

### HRMS spectra of C2

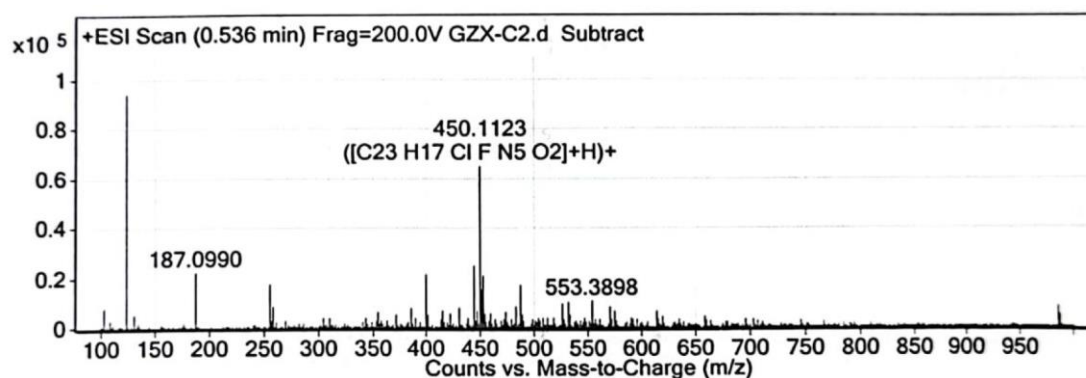

### HRMS spectra of C3

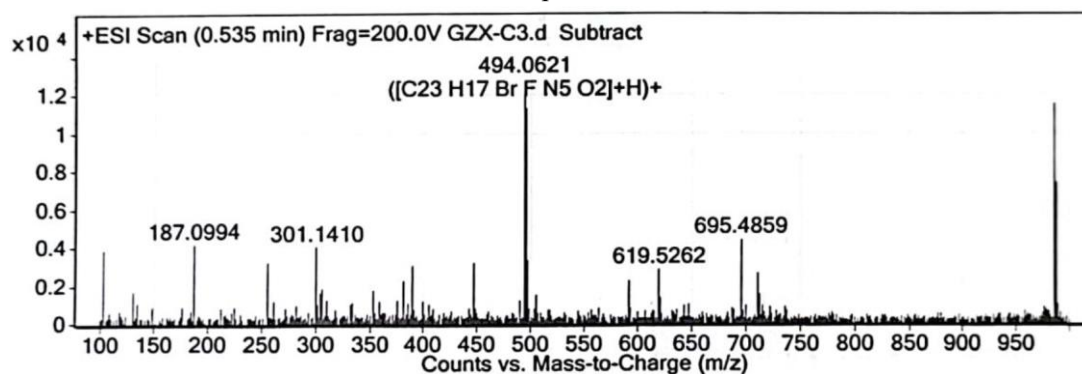

### HRMS spectra of C4

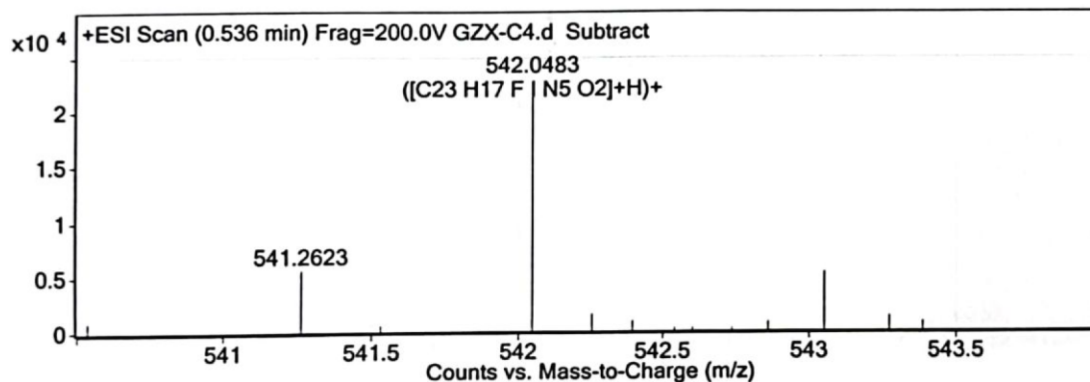

### HRMS spectra of C5

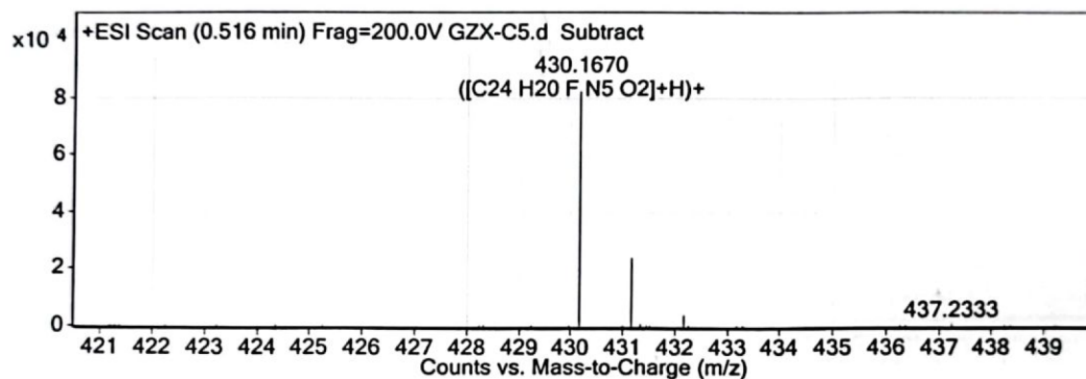

### HRMS spectra of C6

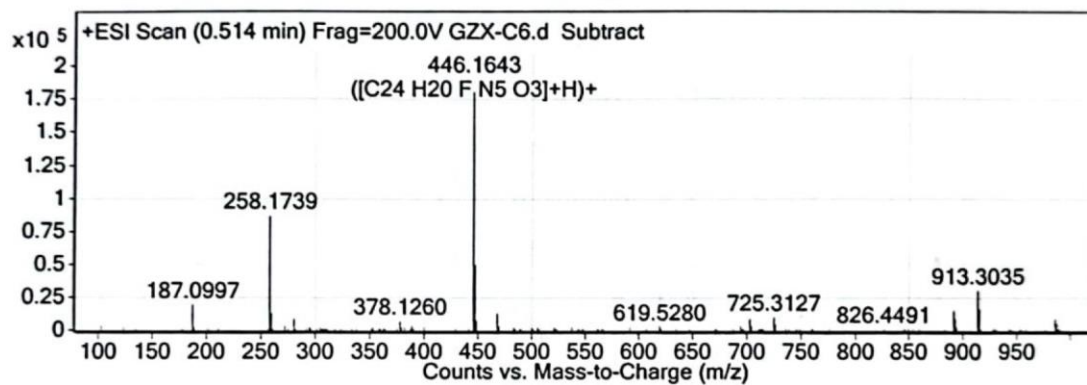

### HPLC Spectra of Target Compounds

Column: ZORBAX SB-C18 column (250 mm × 4.6 mm).

Mobile phase: A was methanol, and mobile phase;

B was 30 mM NaH<sub>2</sub>PO<sub>4</sub> in water (pH = 2.5)

Wavelength: 260 nm.

Rate: 1 mL/min.

Temperature: 25 °C.

HPLC spectra of **A1**

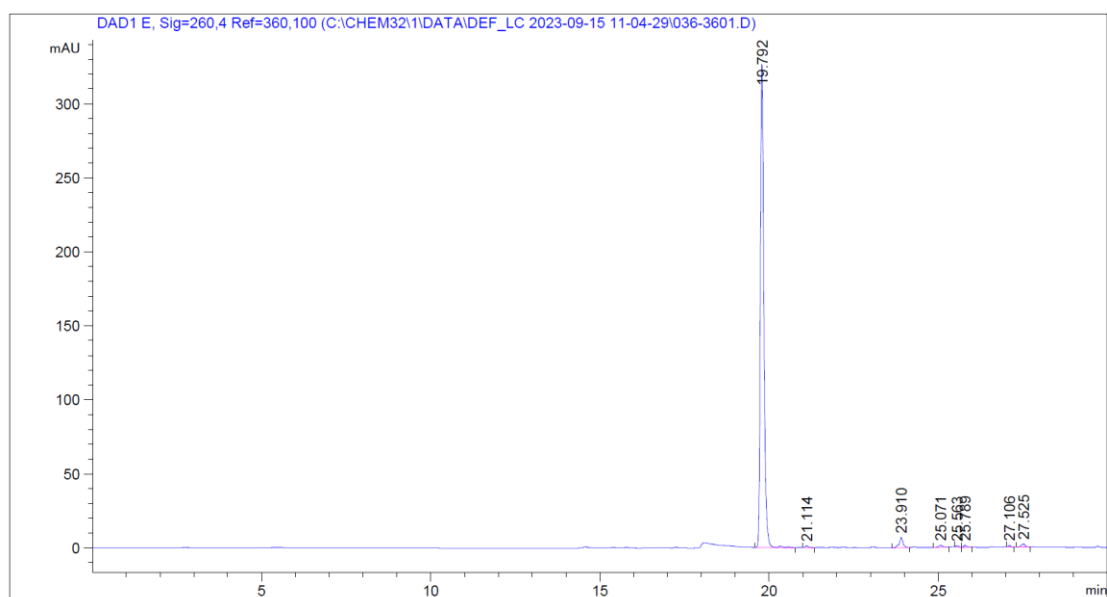

| 峰<br># | 保留时间<br>[min] | 类型   | 峰宽<br>[min] | 峰面积<br>[mAU*s] | 峰高<br>[mAU] | 峰面积<br>% |
|--------|---------------|------|-------------|----------------|-------------|----------|
| 1      | 19.792        | BV R | 0.1096      | 2341.39917     | 326.86398   | 95.4274  |
| 2      | 21.114        | BB   | 0.1035      | 9.22068        | 1.32053     | 0.3758   |
| 3      | 23.910        | BB   | 0.1130      | 53.89485       | 6.91304     | 2.1966   |
| 4      | 25.071        | BB   | 0.1149      | 10.58587       | 1.35825     | 0.4314   |
| 5      | 25.563        | BB   | 0.0802      | 5.33062        | 1.03233     | 0.2173   |
| 6      | 25.789        | BB   | 0.0964      | 8.58453        | 1.31048     | 0.3499   |
| 7      | 27.106        | BB   | 0.0790      | 5.36432        | 1.06148     | 0.2186   |
| 8      | 27.525        | BB   | 0.1204      | 19.21272       | 2.18803     | 0.7830   |

HPLC spectra of A2

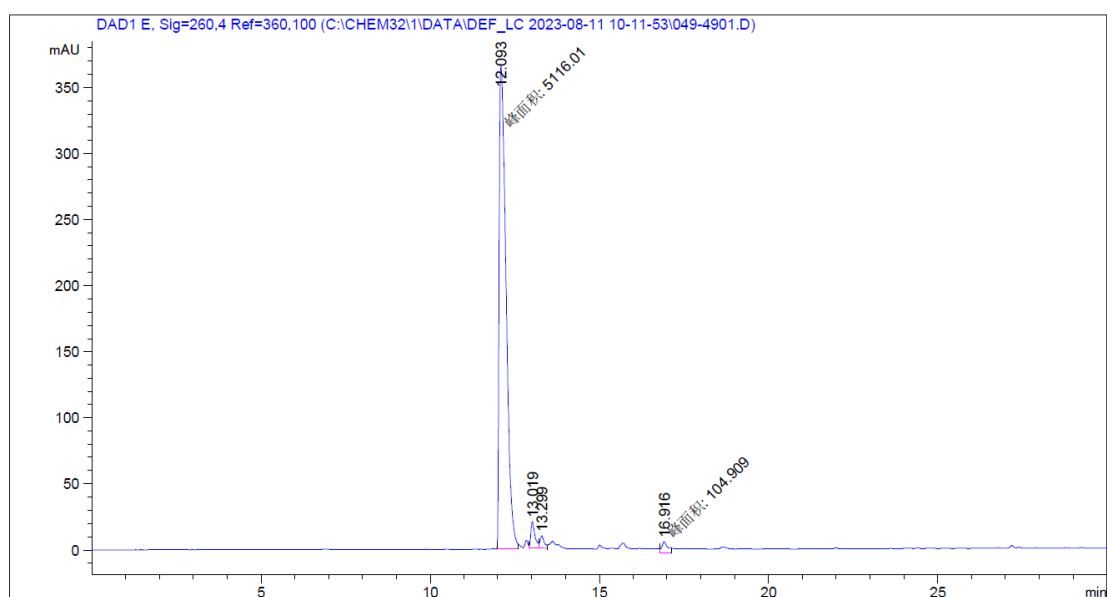

| 峰<br># | 保留时间<br>[min] | 类型 | 峰宽<br>[min] | 峰面积<br>[mAU*s] | 峰高<br>[mAU] | 峰面积<br>% |
|--------|---------------|----|-------------|----------------|-------------|----------|
| 1      | 12.093        | MM | 0.2331      | 5116.00586     | 365.76669   | 93.6698  |
| 2      | 13.019        | VV | 0.1200      | 163.19173      | 19.83355    | 2.9879   |
| 3      | 13.299        | VV | 0.1226      | 77.63564       | 9.18524     | 1.4214   |
| 4      | 16.916        | MM | 0.2054      | 104.90933      | 8.51197     | 1.9208   |

HPLC spectra of A3

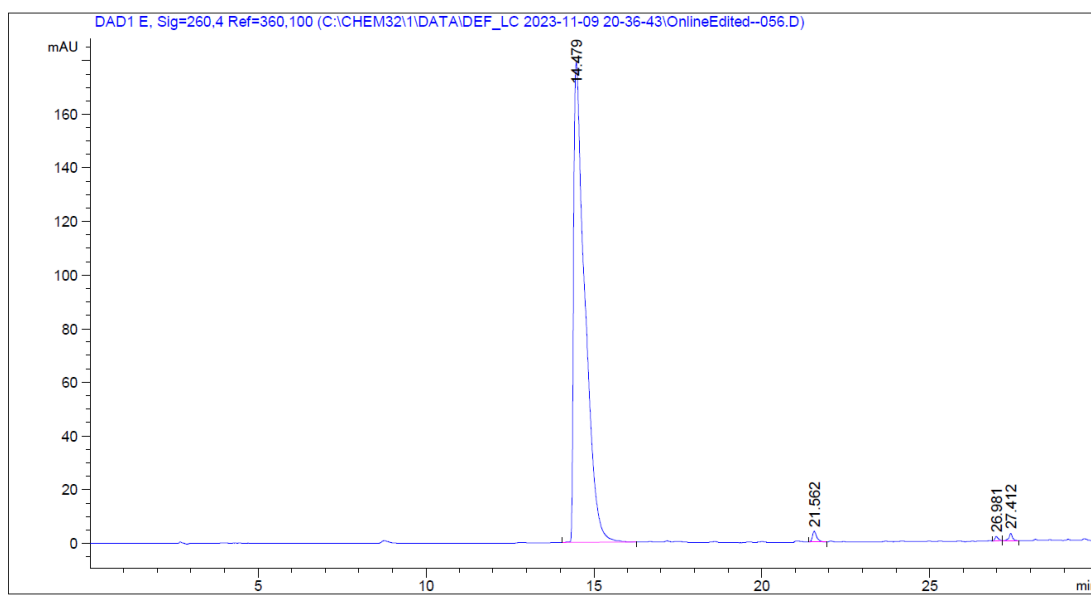

| 峰<br># | 保留时间<br>[min] | 类型 | 峰宽<br>[min] | 峰面积<br>[mAU*s] | 峰高<br>[mAU] | 峰面积<br>% |
|--------|---------------|----|-------------|----------------|-------------|----------|
| 1      | 14.479        | BB | 0.3299      | 4167.32520     | 178.83209   | 98.4801  |
| 2      | 21.562        | BB | 0.1278      | 35.32076       | 4.04605     | 0.8347   |
| 3      | 26.981        | BB | 0.0938      | 10.57634       | 1.67095     | 0.2499   |
| 4      | 27.412        | BB | 0.1036      | 18.41903       | 2.63407     | 0.4353   |

HPLC spectra of A4

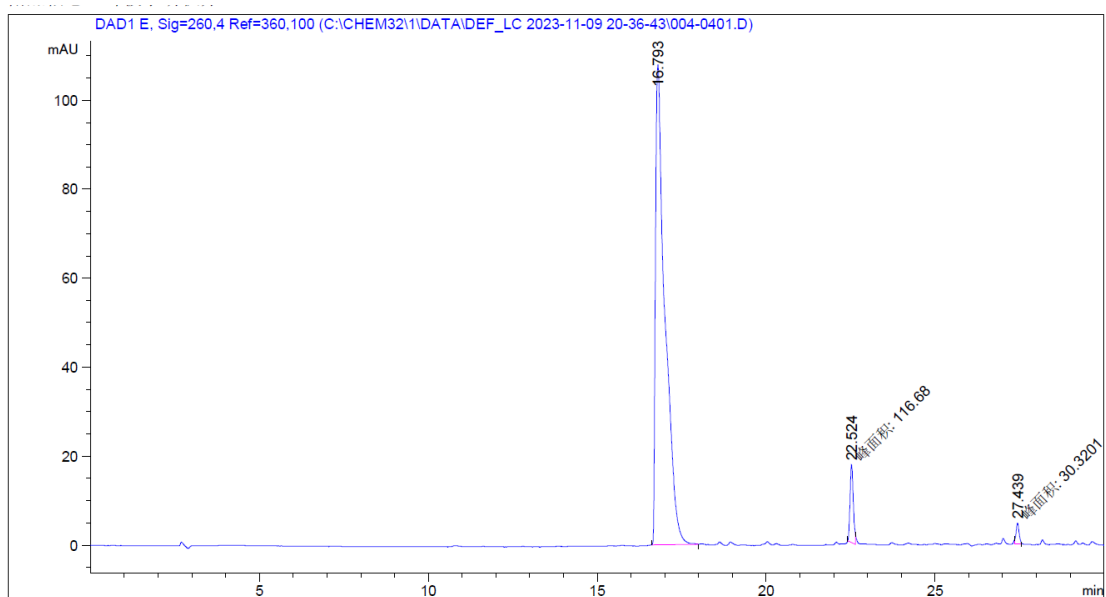

| 峰 # | 保留时间 [min] | 类型 | 峰宽 [min] | 峰面积 [mAU*s] | 峰高 [mAU]  | 峰面积 %   |
|-----|------------|----|----------|-------------|-----------|---------|
| 1   | 16.793     | BB | 0.2795   | 2122.89600  | 107.89967 | 93.5239 |
| 2   | 22.524     | MM | 0.1107   | 116.67965   | 17.56579  | 5.1403  |
| 3   | 27.439     | MM | 0.1057   | 30.32015    | 4.78274   | 1.3358  |

### HPLC spectra of A5

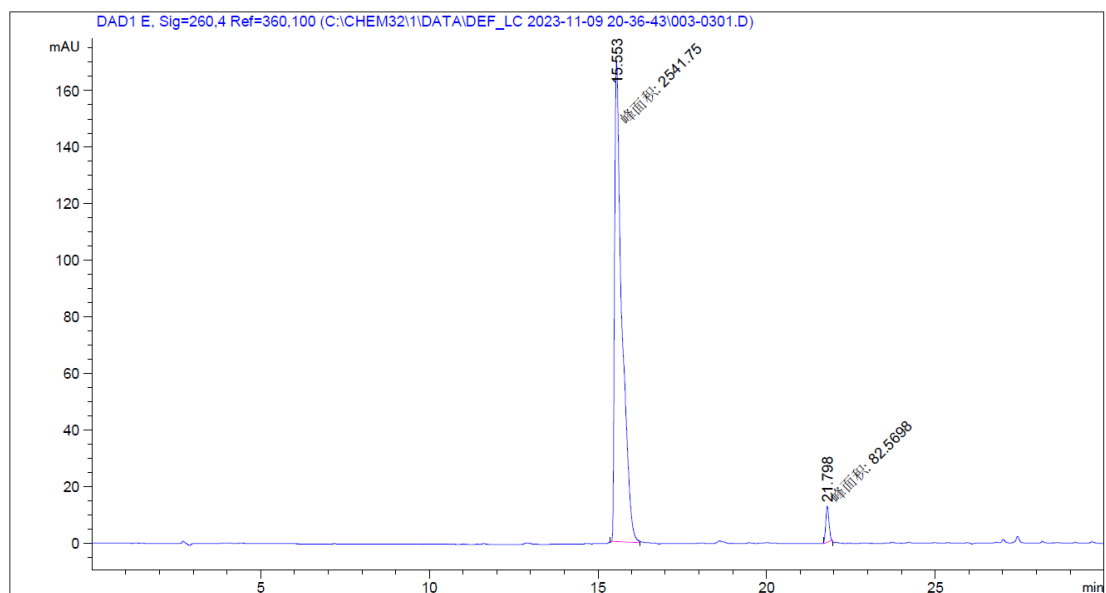

| 峰<br># | 保留时间<br>[min] | 类型 | 峰宽<br>[min] | 峰面积<br>[mAU*s] | 峰高<br>[mAU] | 峰面积<br>% |
|--------|---------------|----|-------------|----------------|-------------|----------|
| 1      | 15.553        | MM | 0.2498      | 2541.74683     | 169.55565   | 96.8537  |
| 2      | 21.798        | MM | 0.1090      | 82.56983       | 12.62951    | 3.1463   |

HPLC spectra of A6

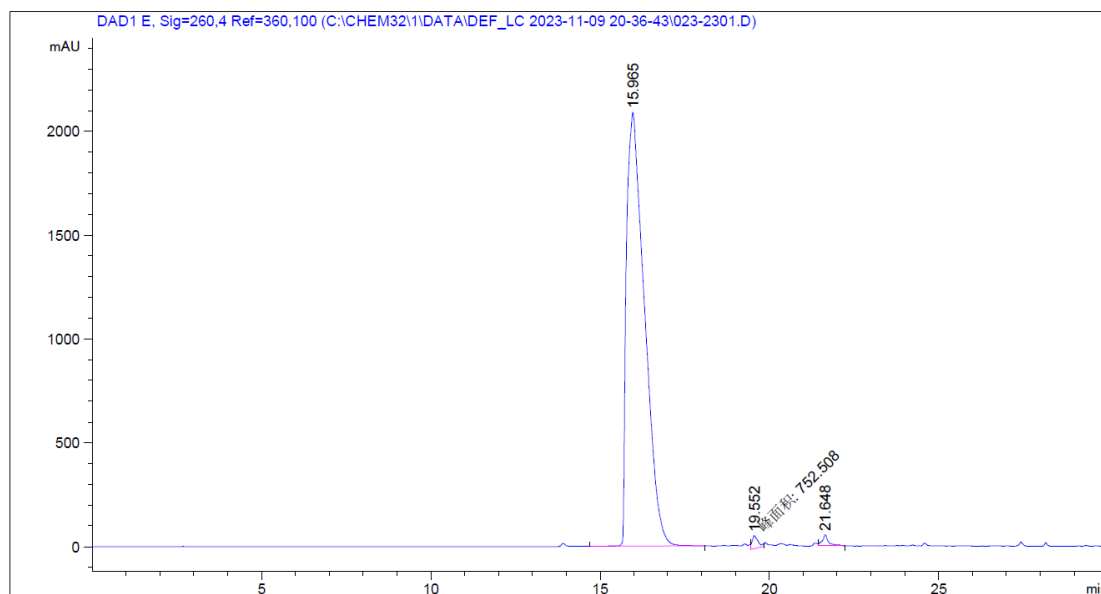

| 峰<br># | 保留时间<br>[min] | 类型   | 峰宽<br>[min] | 峰面积<br>[mAU*s] | 峰高<br>[mAU] | 峰面积<br>% |
|--------|---------------|------|-------------|----------------|-------------|----------|
| 1      | 15.965        | BV R | 0.4769      | 7.68121e4      | 2088.33008  | 98.1540  |
| 2      | 19.552        | MM   | 0.1975      | 752.50830      | 63.49085    | 0.9616   |
| 3      | 21.648        | VV R | 0.1724      | 692.11145      | 53.98813    | 0.8844   |

HPLC spectra of A7

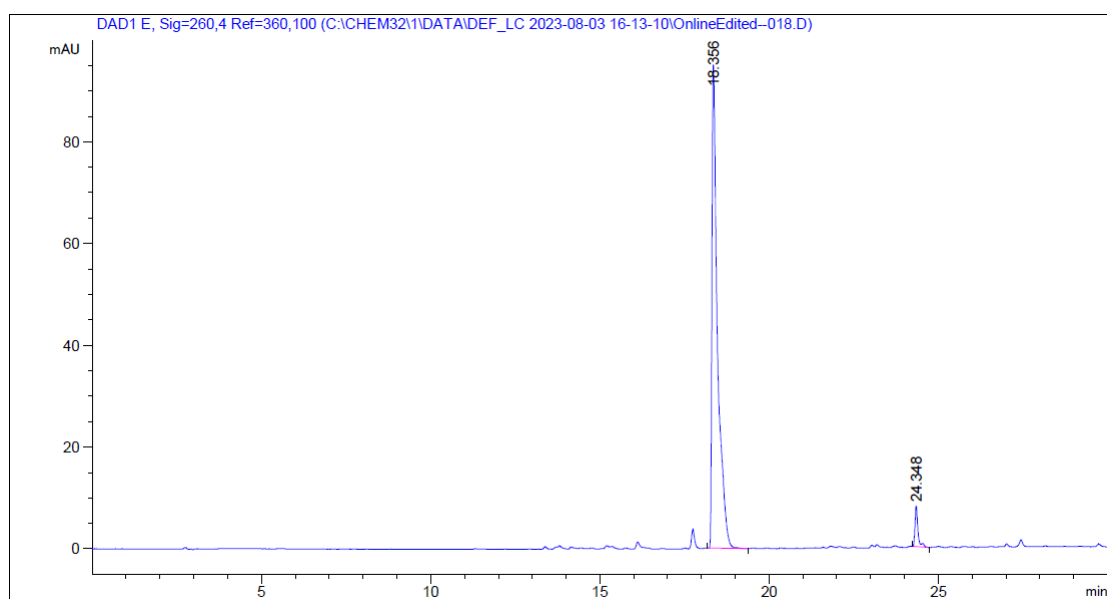

| 峰 # | 保留时间 [min] | 类型   | 峰宽 [min] | 峰面积 [mAU*s] | 峰高 [mAU] | 峰面积 %   |
|-----|------------|------|----------|-------------|----------|---------|
| 1   | 18.356     | BB   | 0.1617   | 1073.06018  | 95.08450 | 95.5142 |
| 2   | 24.348     | BV R | 0.0955   | 50.39562    | 8.00367  | 4.4858  |

HPLC spectra of A8

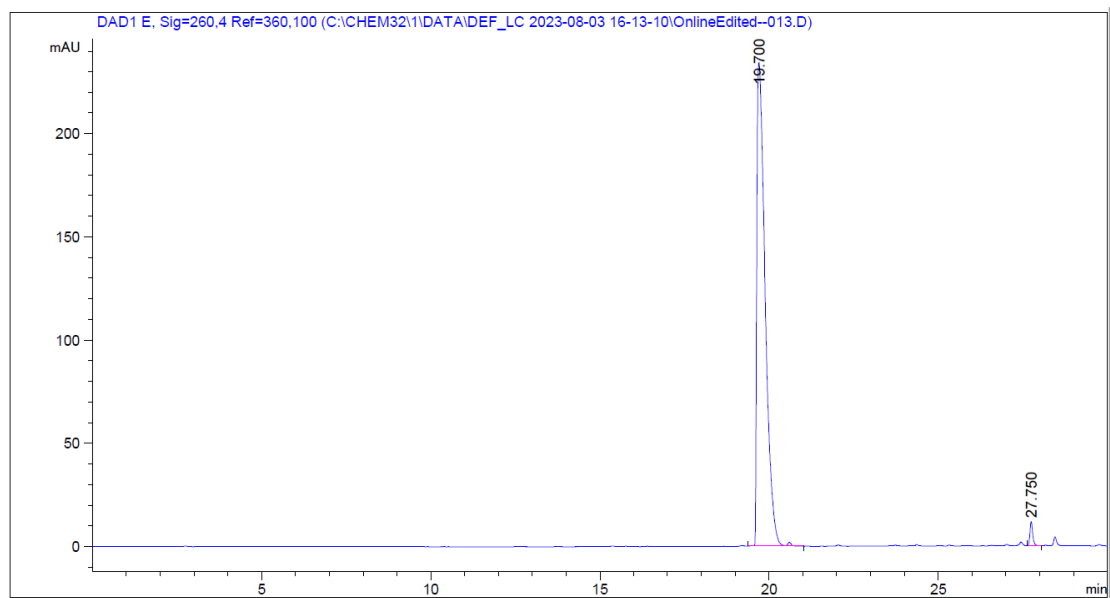

| 峰<br># | 保留时间<br>[min] | 类型   | 峰宽<br>[min] | 峰面积<br>[mAU*s] | 峰高<br>[mAU] | 峰面积<br>% |
|--------|---------------|------|-------------|----------------|-------------|----------|
| 1      | 19.700        | BV R | 0.2706      | 3999.25781     | 234.08865   | 98.4124  |
| 2      | 27.750        | BB   | 0.0846      | 64.51811       | 11.65327    | 1.5876   |

HPLC spectra of **A9**

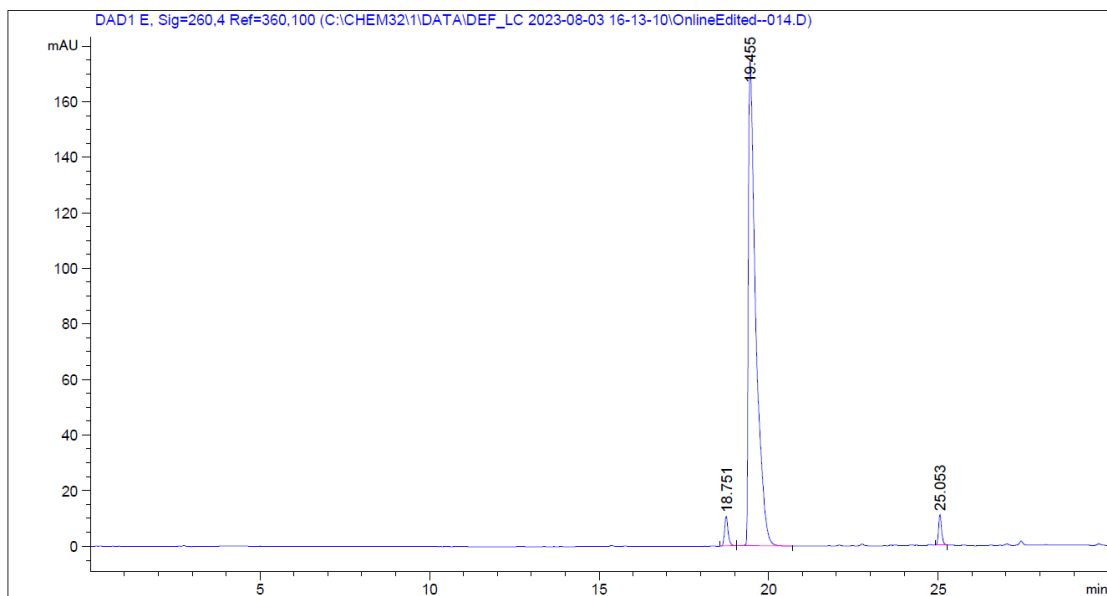

| 峰<br># | 保留时间<br>[min] | 类型 | 峰宽<br>[min] | 峰面积<br>[mAU*s] | 峰高<br>[mAU] | 峰面积<br>% |
|--------|---------------|----|-------------|----------------|-------------|----------|
| 1      | 18.751        | BB | 0.1097      | 76.18335       | 10.62007    | 2.7023   |
| 2      | 19.455        | BB | 0.2268      | 2674.31641     | 174.46124   | 94.8604  |
| 3      | 25.053        | BB | 0.0971      | 68.71381       | 10.96608    | 2.4373   |

HPLC spectra of **B1**

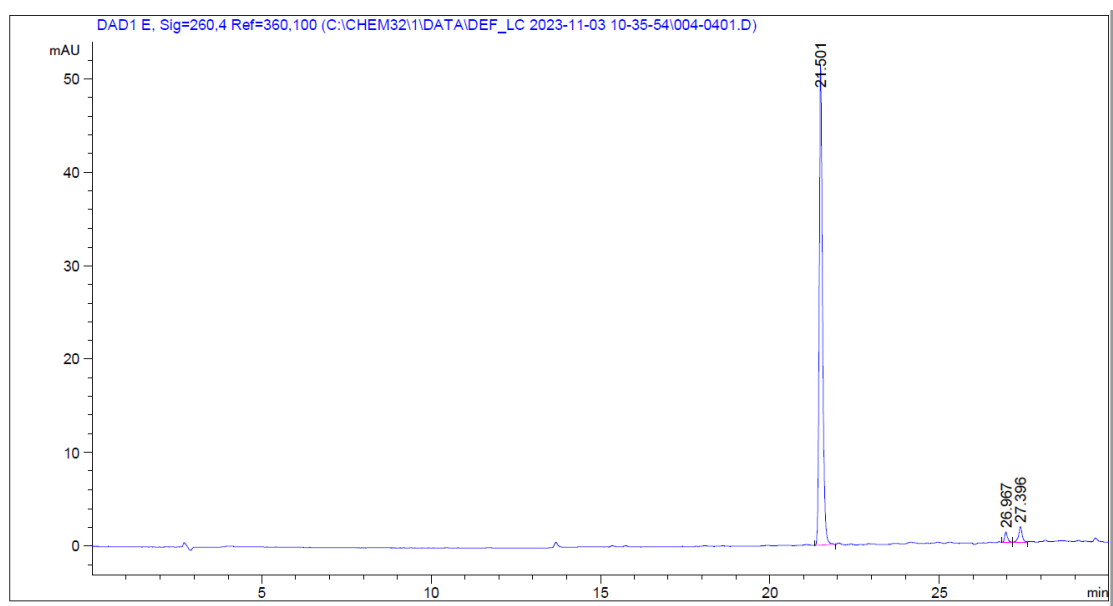

| 峰 # | 保留时间 [min] | 类型 | 峰宽 [min] | 峰面积 [mAU*s] | 峰高 [mAU] | 峰面积 %   |
|-----|------------|----|----------|-------------|----------|---------|
| 1   | 21.501     | BB | 0.1077   | 359.30301   | 51.31216 | 95.2832 |
| 2   | 26.967     | BB | 0.0872   | 6.20390     | 1.07646  | 1.6452  |
| 3   | 27.396     | BB | 0.1018   | 11.58253    | 1.65287  | 3.0716  |

### HPLC spectra of B2

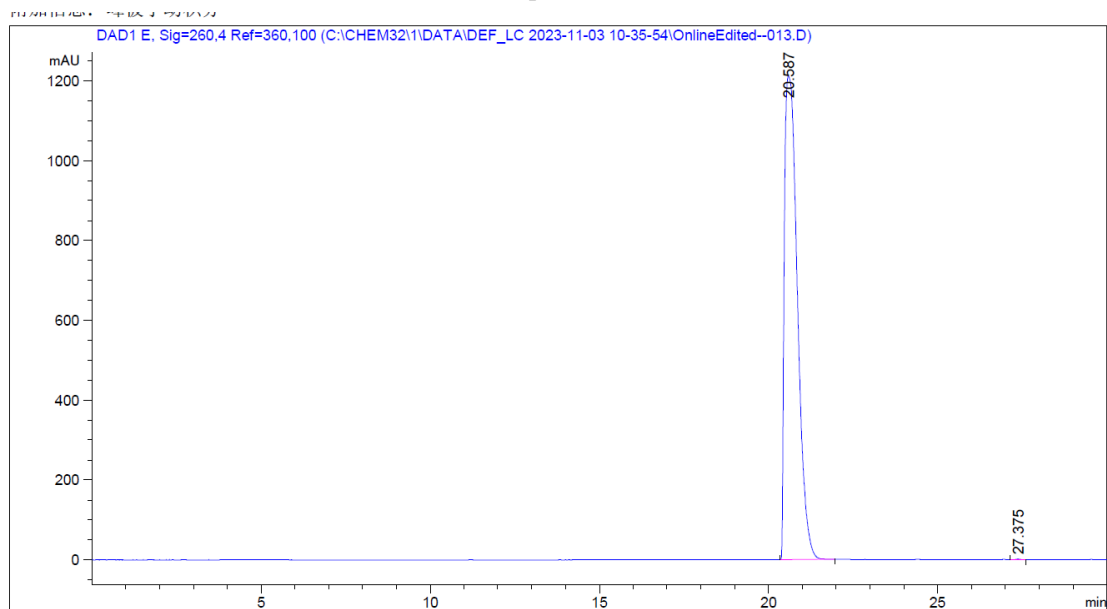

| 峰<br># | 保留时间<br>[min] | 类型 | 峰宽<br>[min] | 峰面积<br>[mAU*s] | 峰高<br>[mAU] | 峰面积<br>% |
|--------|---------------|----|-------------|----------------|-------------|----------|
| 1      | 20.587        | BB | 0.4246      | 3.22403e4      | 1210.99304  | 99.9648  |
| 2      | 27.375        | BB | 0.1008      | 11.34617       | 1.63865     | 0.0352   |

HPLC spectra of **B3**

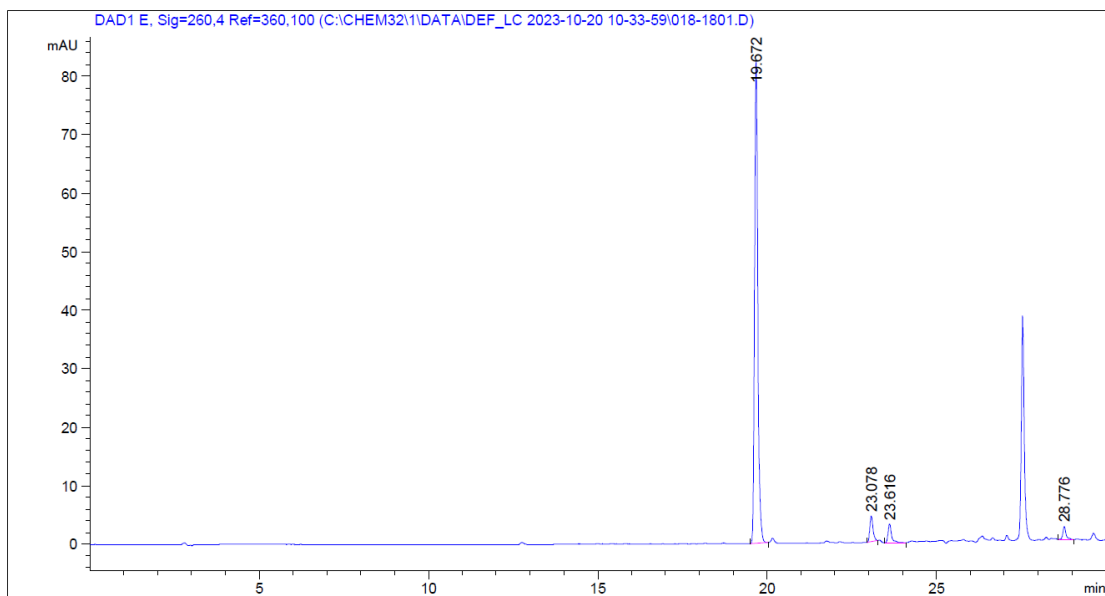

| 峰<br># | 保留时间<br>[min] | 类型 | 峰宽<br>[min] | 峰面积<br>[mAU*s] | 峰高<br>[mAU] | 峰面积<br>% |
|--------|---------------|----|-------------|----------------|-------------|----------|
| 1      | 19.672        | BB | 0.1025      | 555.22852      | 82.47649    | 89.2878  |
| 2      | 23.078        | BB | 0.1008      | 28.87181       | 4.38463     | 4.6430   |
| 3      | 23.616        | BB | 0.1052      | 22.45496       | 3.22793     | 3.6110   |
| 4      | 28.776        | BB | 0.1036      | 15.28607       | 2.24060     | 2.4582   |

HPLC spectra of **B4**

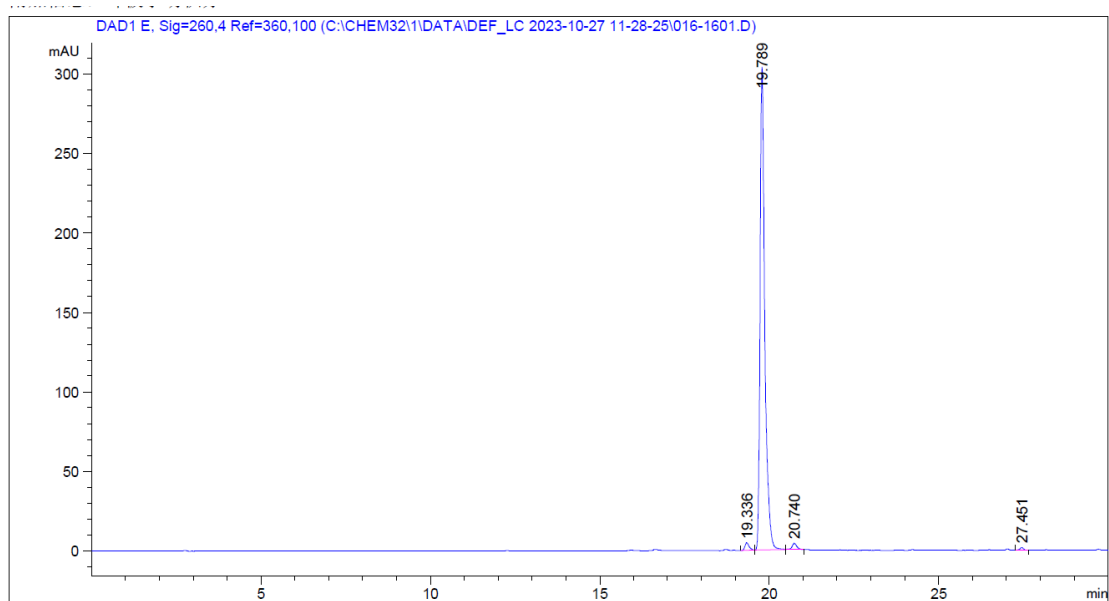

| 峰 # | 保留时间 [min] | 类型 | 峰宽 [min] | 峰面积 [mAU*s] | 峰高 [mAU]  | 峰面积 %   |
|-----|------------|----|----------|-------------|-----------|---------|
| 1   | 19.336     | BV | 0.1357   | 43.65918    | 4.82103   | 1.4283  |
| 2   | 19.789     | VB | 0.1437   | 2963.19263  | 304.05615 | 96.9429 |
| 3   | 20.740     | BB | 0.1425   | 37.76974    | 3.91630   | 1.2357  |
| 4   | 27.451     | BB | 0.1002   | 12.01470    | 1.79260   | 0.3931  |

HPLC spectra of **B5**

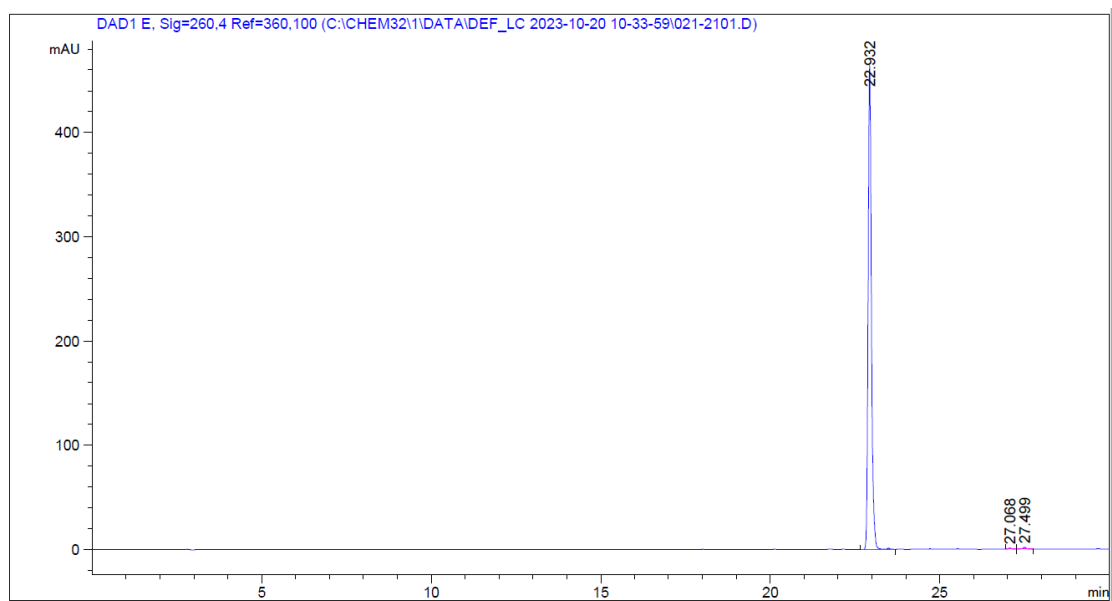

| 峰<br># | 保留时间<br>[min] | 类型   | 峰宽<br>[min] | 峰面积<br>[mAU*s] | 峰高<br>[mAU] | 峰面积<br>% |
|--------|---------------|------|-------------|----------------|-------------|----------|
| 1      | 22.932        | BV R | 0.1011      | 3080.31567     | 465.99551   | 99.3537  |
| 2      | 27.068        | BB   | 0.0884      | 6.42697        | 1.09552     | 0.2073   |
| 3      | 27.499        | BB   | 0.1122      | 13.61160       | 1.76066     | 0.4390   |

HPLC spectra of **B6**

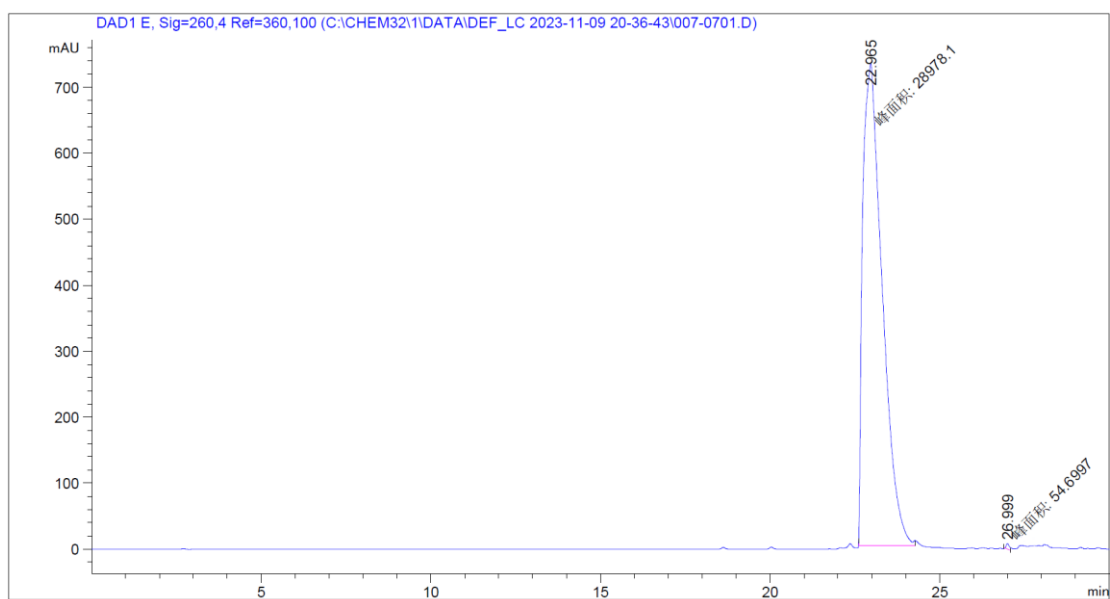

| 峰<br># | 保留时间<br>[min] | 类型 | 峰宽<br>[min] | 峰面积<br>[mAU*s] | 峰高<br>[mAU] | 峰面积<br>% |
|--------|---------------|----|-------------|----------------|-------------|----------|
| 1      | 22.965        | MM | 0.6616      | 2.89781e4      | 729.96051   | 99.8116  |
| 2      | 26.999        | MM | 0.1055      | 54.69966       | 8.64268     | 0.1884   |

HPLC spectra of **B7**

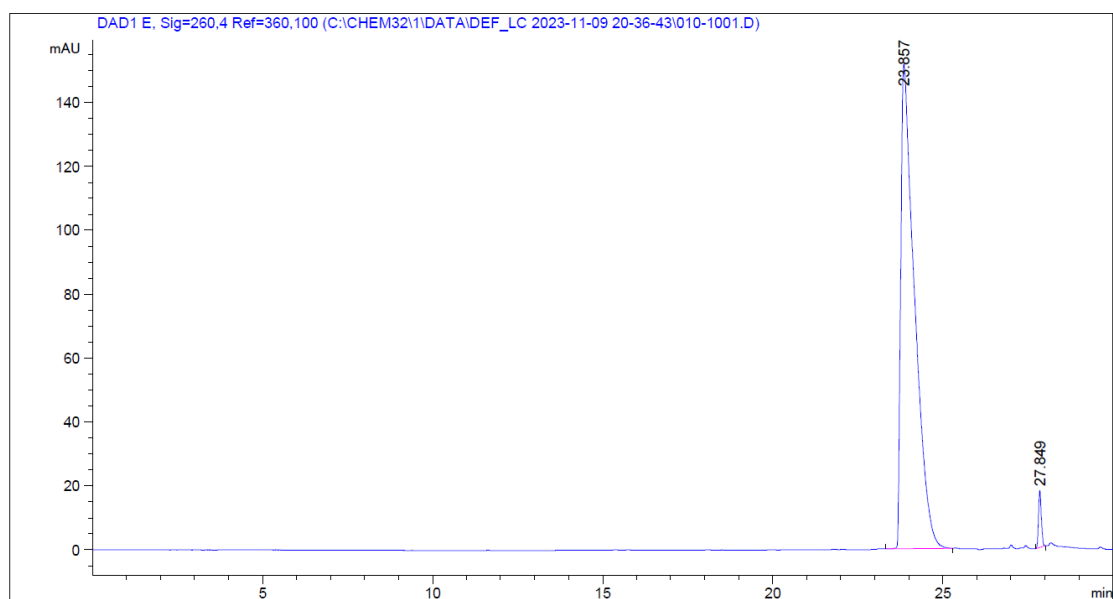

| 峰 # | 保留时间 [min] | 类型 | 峰宽 [min] | 峰面积 [mAU*s] | 峰高 [mAU]  | 峰面积 %   |
|-----|------------|----|----------|-------------|-----------|---------|
| 1   | 23.857     | BB | 0.3827   | 4274.89111  | 151.73418 | 97.6772 |
| 2   | 27.849     | BB | 0.0865   | 101.65875   | 17.84328  | 2.3228  |

### HPLC spectra of B8

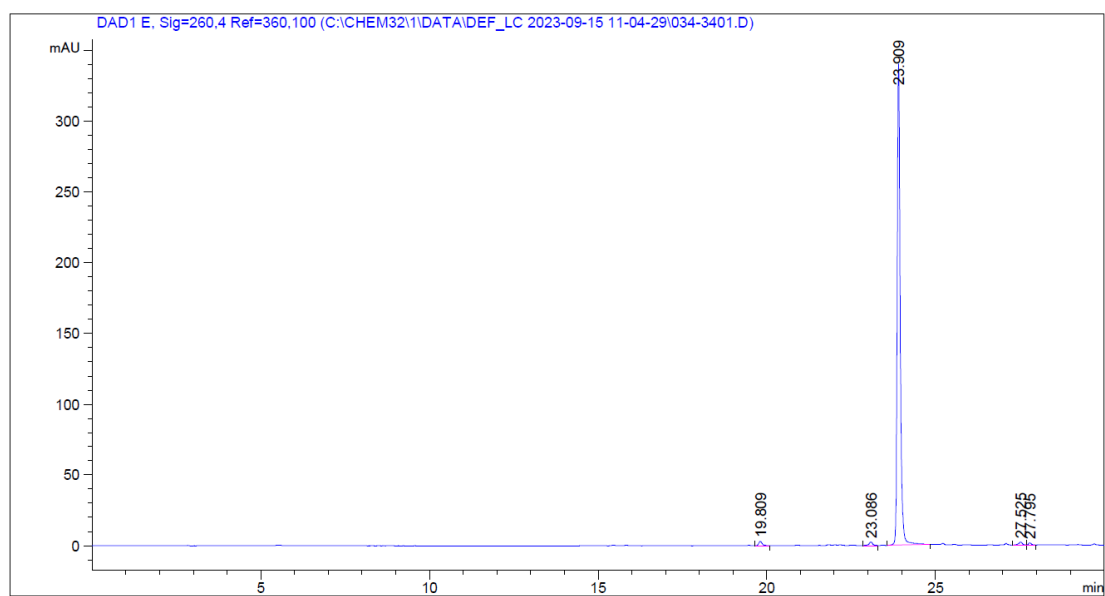

| 峰<br># | 保留时间<br>[min] | 类型 | 峰宽<br>[min] | 峰面积<br>[mAU*s] | 峰高<br>[mAU] | 峰面积<br>% |
|--------|---------------|----|-------------|----------------|-------------|----------|
| 1      | 19.809        | BB | 0.1066      | 21.45383       | 3.03031     | 0.9788   |
| 2      | 23.086        | BB | 0.1076      | 18.64443       | 2.54029     | 0.8506   |
| 3      | 23.909        | BB | 0.0928      | 2124.25708     | 340.46637   | 96.9134  |
| 4      | 27.525        | BV | 0.1140      | 18.38697       | 2.28297     | 0.8389   |
| 5      | 27.795        | VB | 0.0889      | 9.17040        | 1.55232     | 0.4184   |

HPLC spectra of **B9**

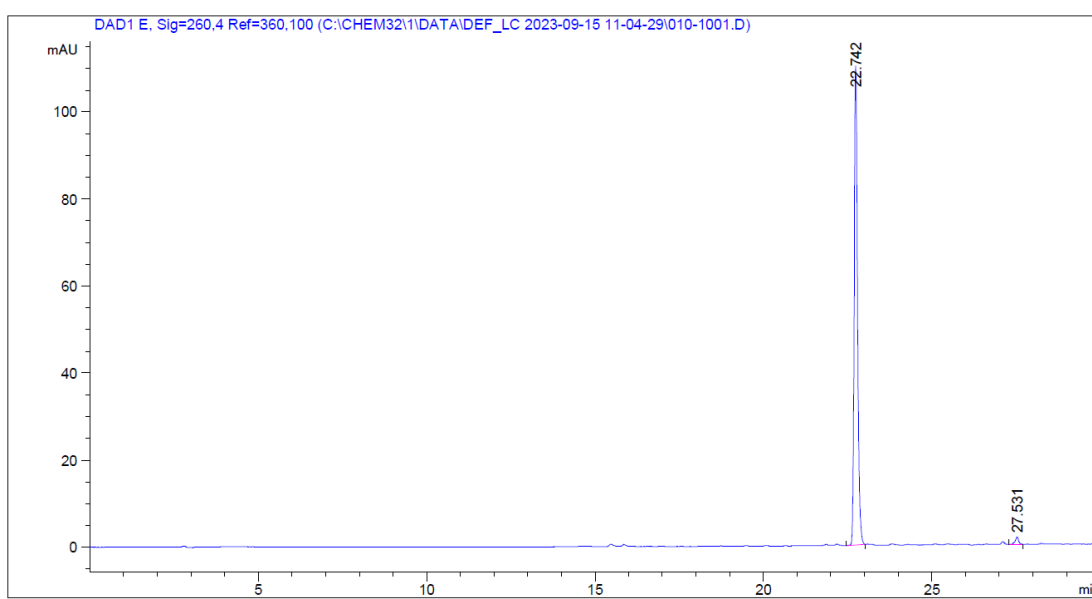

| 峰<br># | 保留时间<br>[min] | 类型 | 峰宽<br>[min] | 峰面积<br>[mAU*s] | 峰高<br>[mAU] | 峰面积<br>% |
|--------|---------------|----|-------------|----------------|-------------|----------|
| 1      | 22.742        | BB | 0.1076      | 770.31415      | 110.14130   | 98.4747  |
| 2      | 27.531        | BB | 0.1024      | 11.93161       | 1.68875     | 1.5253   |

HPLC spectra of **B10**

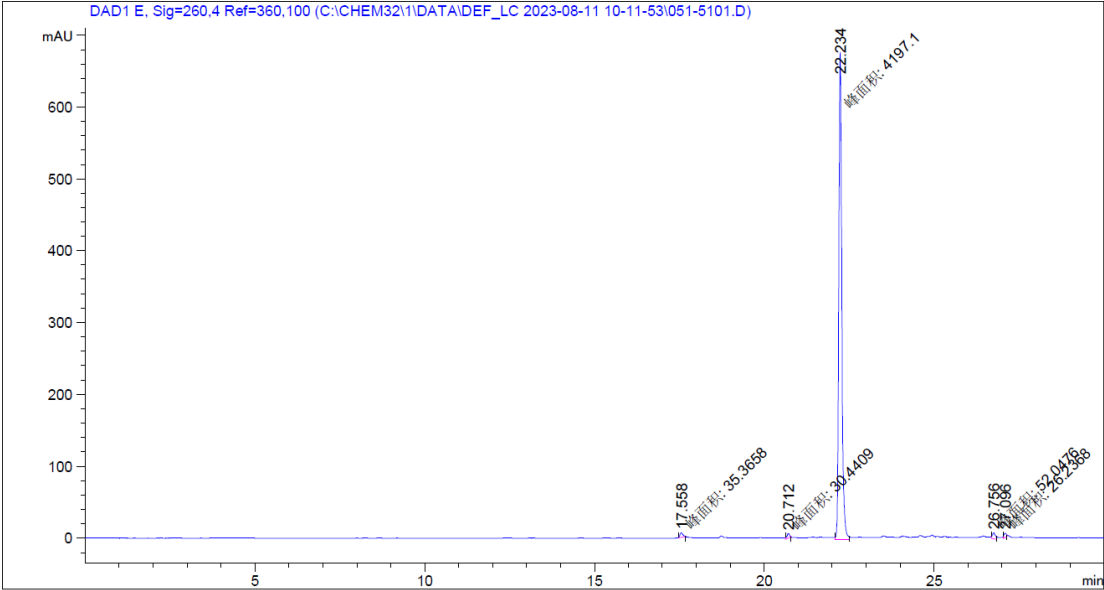

| 峰 # | 保留时间 [min] | 类型 | 峰宽 [min] | 峰面积 [mAU*s] | 峰高 [mAU]  | 峰面积 %   |
|-----|------------|----|----------|-------------|-----------|---------|
| 1   | 17.558     | MM | 0.0941   | 35.36583    | 6.26625   | 0.8147  |
| 2   | 20.712     | MM | 0.0905   | 30.44091    | 5.60421   | 0.7012  |
| 3   | 22.234     | MM | 0.1030   | 4197.10449  | 679.31915 | 96.6808 |
| 4   | 26.756     | MM | 0.1055   | 52.04763    | 8.21880   | 1.1989  |
| 5   | 27.096     | MM | 0.0770   | 26.23682    | 5.67645   | 0.6044  |

HPLC spectra of B11

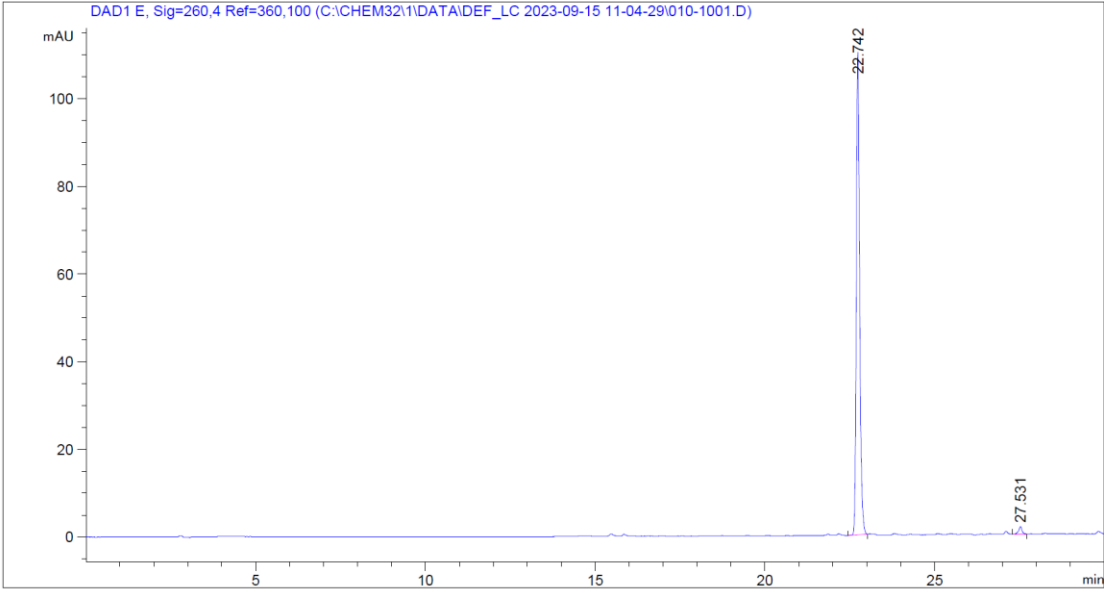

| 峰<br># | 保留时间<br>[min] | 类型 | 峰宽<br>[min] | 峰面积<br>[mAU*s] | 峰高<br>[mAU] | 峰面积<br>% |
|--------|---------------|----|-------------|----------------|-------------|----------|
| 1      | 22.742        | BB | 0.1076      | 770.31415      | 110.14130   | 98.4747  |
| 2      | 27.531        | BB | 0.1024      | 11.93161       | 1.68875     | 1.5253   |

HPLC spectra of **B12**

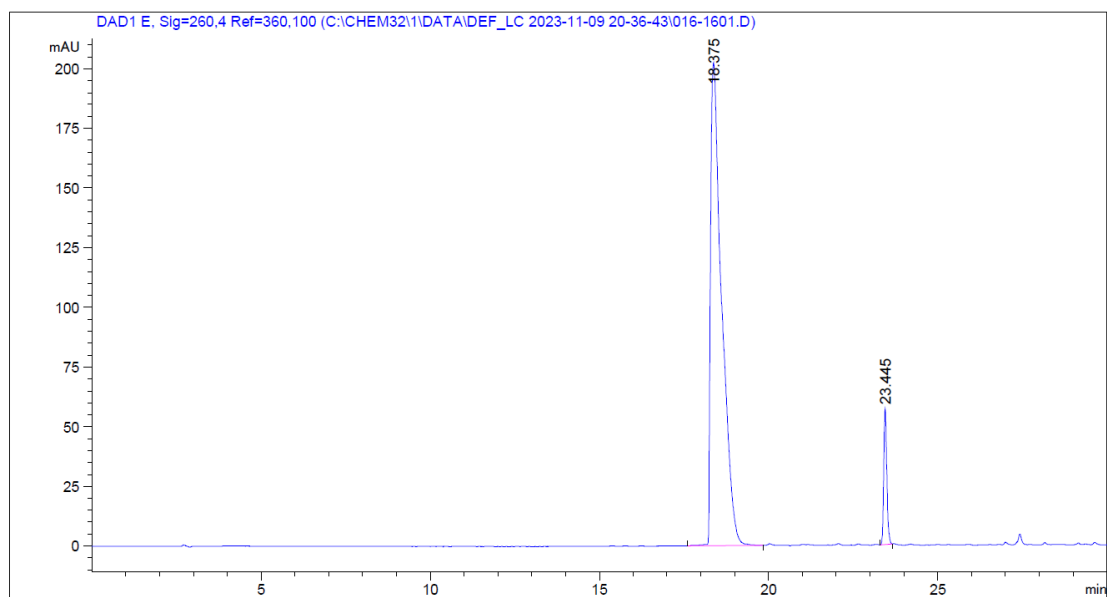

| 峰<br># | 保留时间<br>[min] | 类型 | 峰宽<br>[min] | 峰面积<br>[mAU*s] | 峰高<br>[mAU] | 峰面积<br>% |
|--------|---------------|----|-------------|----------------|-------------|----------|
| 1      | 18.375        | BB | 0.3284      | 4586.63525     | 202.40089   | 92.7406  |
| 2      | 23.445        | BB | 0.0955      | 359.02698      | 56.95766    | 7.2594   |

HPLC spectra of **B13**

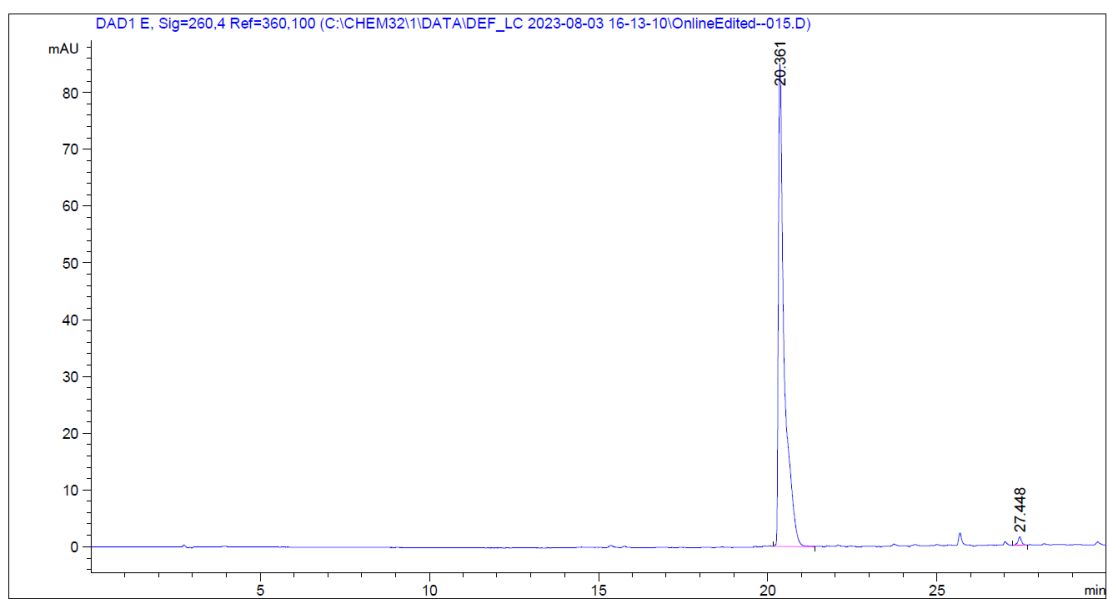

| 峰 # | 保留时间 [min] | 类型 | 峰宽 [min] | 峰面积 [mAU*s] | 峰高 [mAU] | 峰面积 %   |
|-----|------------|----|----------|-------------|----------|---------|
| 1   | 20.361     | BB | 0.1687   | 1009.83582  | 84.91676 | 99.0056 |
| 2   | 27.448     | BB | 0.1012   | 10.14285    | 1.45783  | 0.9944  |

ZZ

# HPLC spectra of B14

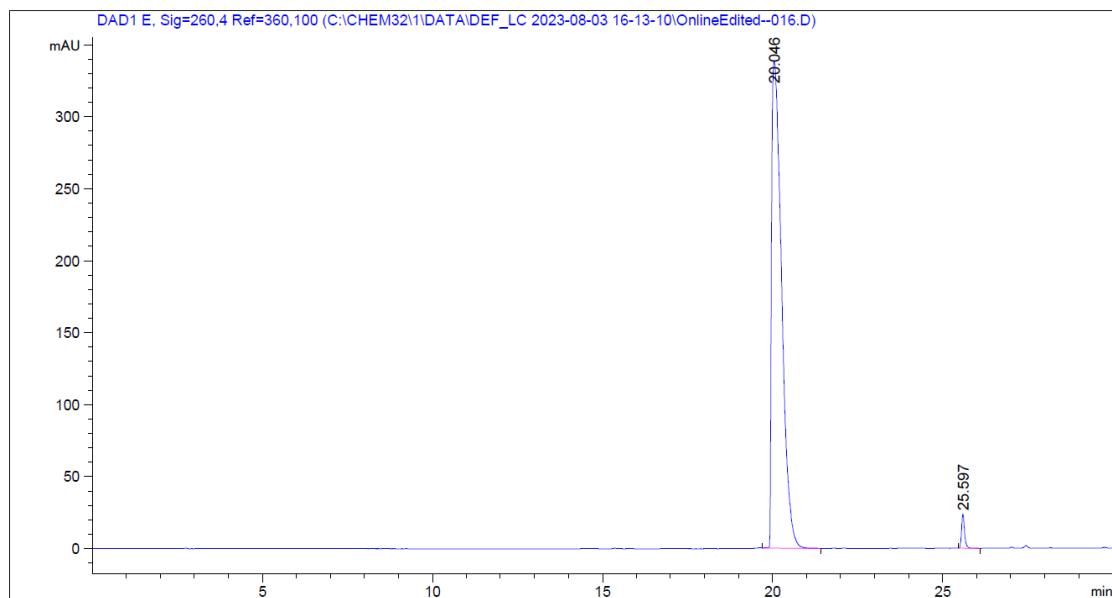

| 峰<br># | 保留时间<br>[min] | 类型 | 峰宽<br>[min] | 峰面积<br>[mAU*s] | 峰高<br>[mAU] | 峰面积<br>% |
|--------|---------------|----|-------------|----------------|-------------|----------|
| 1      | 20.046        | BB | 0.3344      | 6909.10938     | 338.12466   | 97.9509  |
| 2      | 25.597        | BB | 0.0915      | 144.53903      | 23.57373    | 2.0491   |

HPLC spectra of **B15**

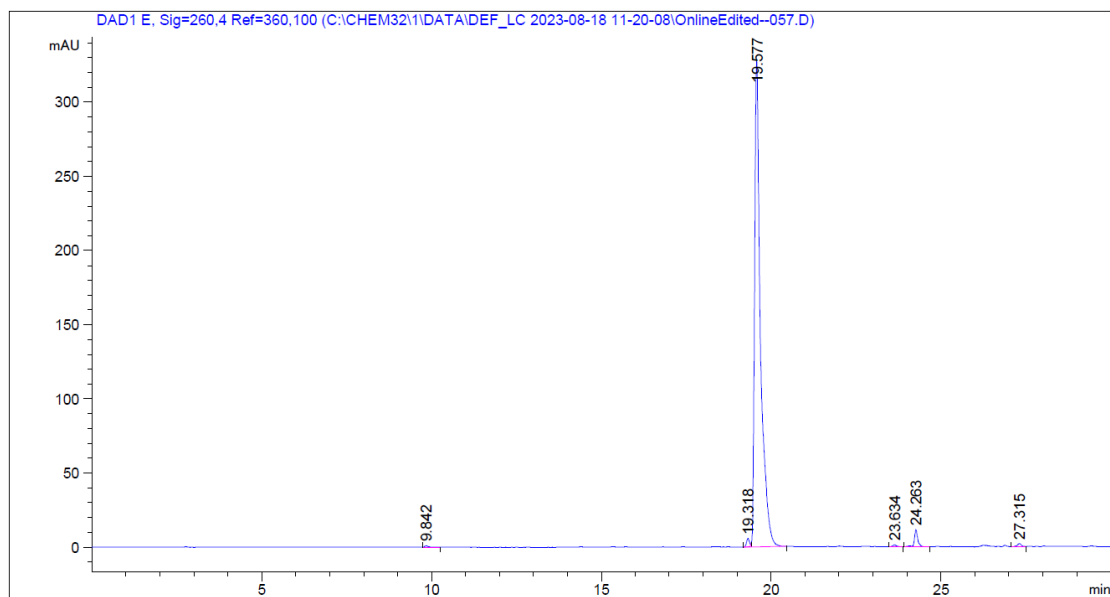

| 峰<br># | 保留时间<br>[min] | 类型   | 峰宽<br>[min] | 峰面积<br>[mAU*s] | 峰高<br>[mAU] | 峰面积<br>% |
|--------|---------------|------|-------------|----------------|-------------|----------|
| 1      | 9.842         | BB   | 0.1095      | 8.62104        | 1.12428     | 0.2122   |
| 2      | 19.318        | BV E | 0.0898      | 33.13997       | 5.70213     | 0.8159   |
| 3      | 19.577        | VB R | 0.1715      | 3914.50708     | 327.39056   | 96.3748  |
| 4      | 23.634        | BB   | 0.1191      | 10.86584       | 1.30494     | 0.2675   |
| 5      | 24.263        | BB   | 0.1028      | 79.21424       | 11.43891    | 1.9502   |
| 6      | 27.315        | BB   | 0.1094      | 15.40387       | 2.05701     | 0.3792   |

HPLC spectra of **B16**

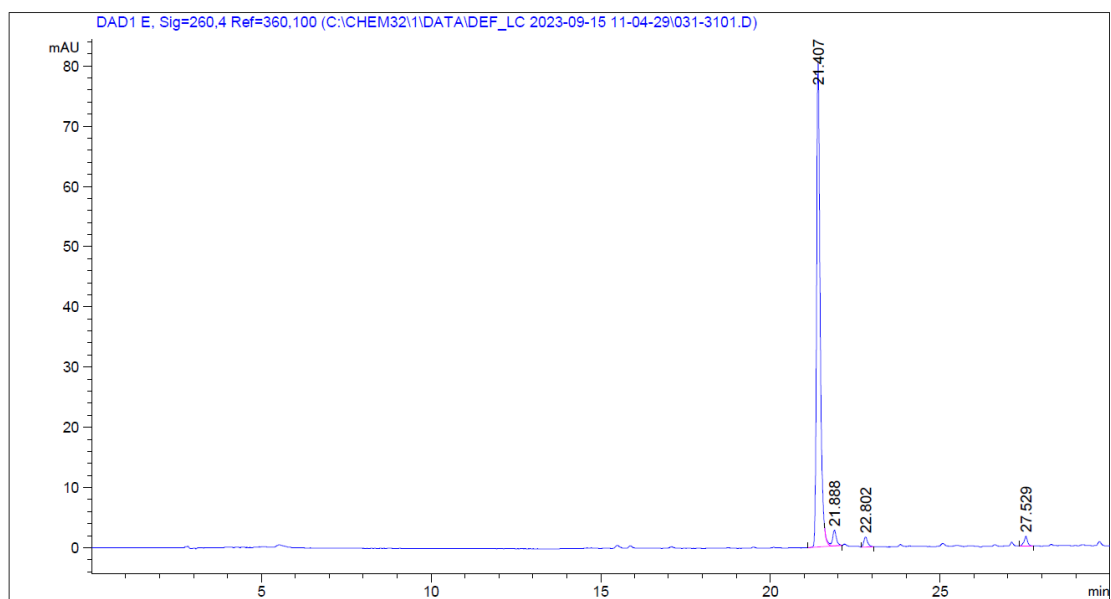

| 峰 # | 保留时间 [min] | 类型   | 峰宽 [min] | 峰面积 [mAU*s] | 峰高 [mAU] | 峰面积 %   |
|-----|------------|------|----------|-------------|----------|---------|
| 1   | 21.407     | BV R | 0.1144   | 610.31061   | 80.52379 | 93.0294 |
| 2   | 21.888     | VB E | 0.1180   | 21.34476    | 2.64822  | 3.2536  |
| 3   | 22.802     | BB   | 0.1147   | 12.51847    | 1.64567  | 1.9082  |
| 4   | 27.529     | BB   | 0.1074   | 11.86641    | 1.62193  | 1.8088  |

HPLC spectra of **B17**

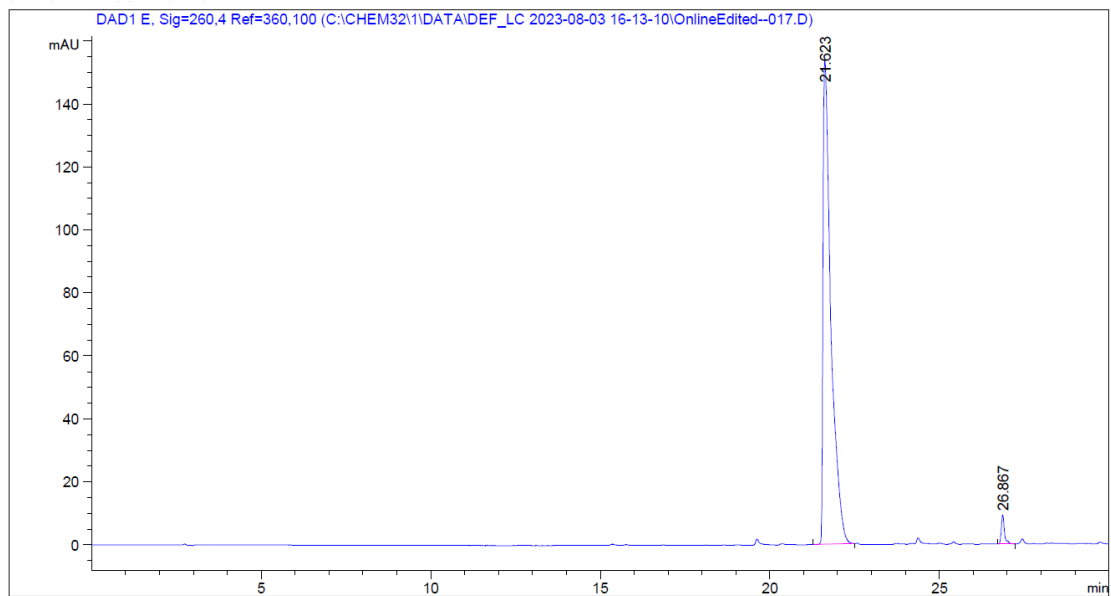

| 峰<br># | 保留时间<br>[min] | 类型 | 峰宽<br>[min] | 峰面积<br>[mAU*s] | 峰高<br>[mAU] | 峰面积<br>% |
|--------|---------------|----|-------------|----------------|-------------|----------|
| 1      | 21.623        | BB | 0.2359      | 2474.10449     | 153.60852   | 97.7015  |
| 2      | 26.867        | BB | 0.0932      | 58.20425       | 9.27961     | 2.2985   |

HPLC spectra of **B18**

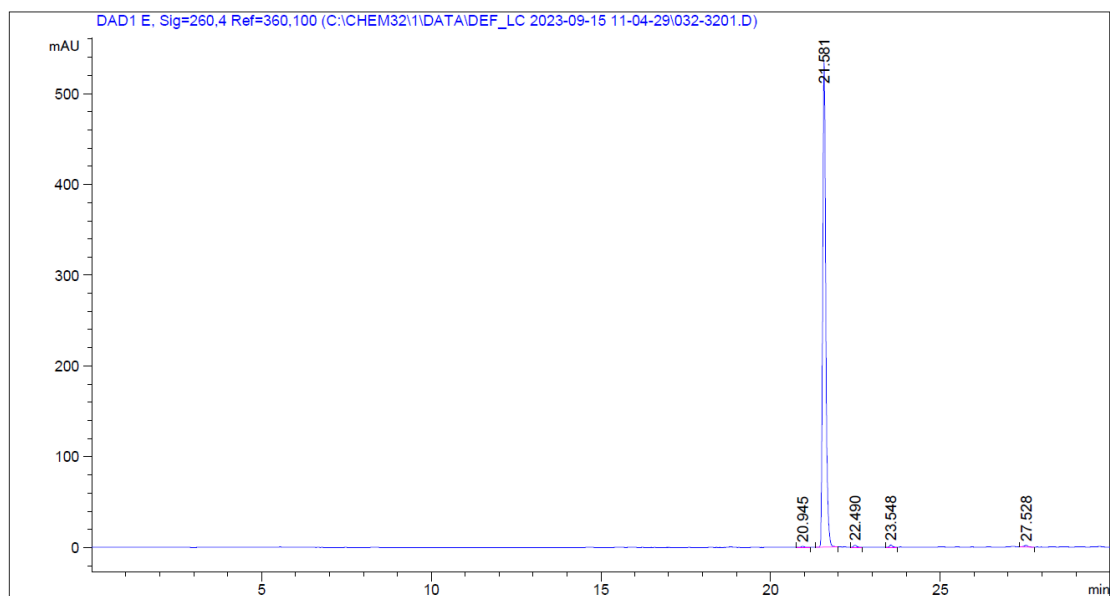

| 峰<br># | 保留时间<br>[min] | 类型 | 峰宽<br>[min] | 峰面积<br>[mAU*s] | 峰高<br>[mAU] | 峰面积<br>% |
|--------|---------------|----|-------------|----------------|-------------|----------|
| 1      | 20.945        | BB | 0.0993      | 7.73263        | 1.19766     | 0.2272   |
| 2      | 21.581        | BB | 0.0951      | 3350.27075     | 534.51971   | 98.4379  |
| 3      | 22.490        | BB | 0.0997      | 15.89215       | 2.38511     | 0.4669   |
| 4      | 23.548        | BB | 0.0928      | 14.64462       | 2.41201     | 0.4303   |
| 5      | 27.528        | BB | 0.1074      | 14.89440       | 1.98912     | 0.4376   |

HPLC spectra of **C1**

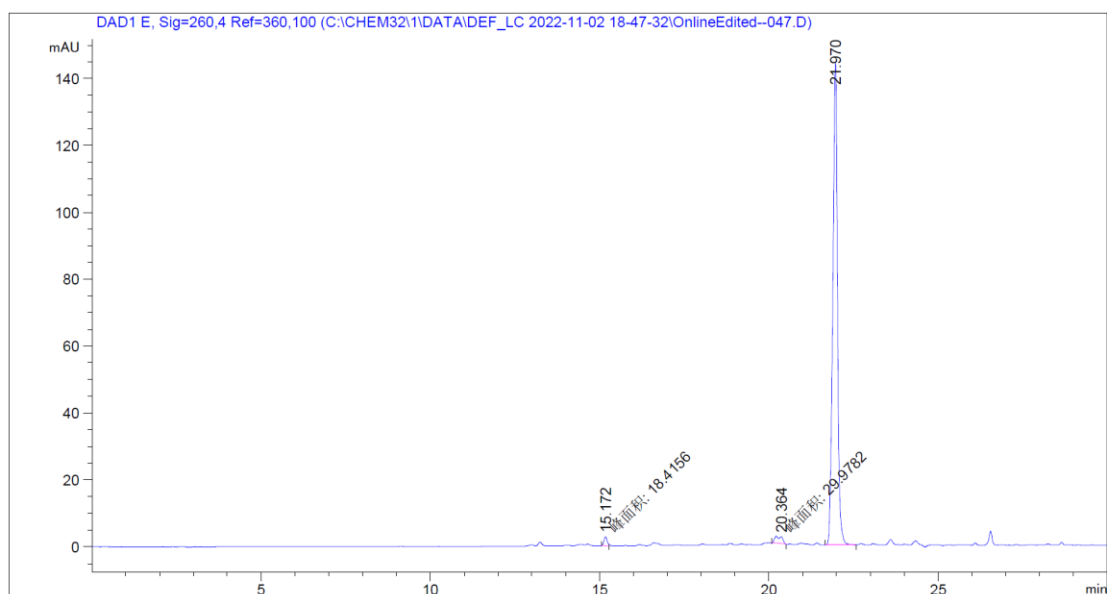

| 峰 # | 保留时间 [min] | 类型 | 峰宽 [min] | 峰面积 [mAU*s] | 峰高 [mAU]  | 峰面积 %   |
|-----|------------|----|----------|-------------|-----------|---------|
| 1   | 15.172     | MM | 0.1136   | 18.41565    | 2.70223   | 1.2980  |
| 2   | 20.364     | MM | 0.2405   | 29.97816    | 2.07720   | 2.1129  |
| 3   | 21.970     | BB | 0.1430   | 1370.40186  | 144.01973 | 96.5891 |

HPLC spectra of C2

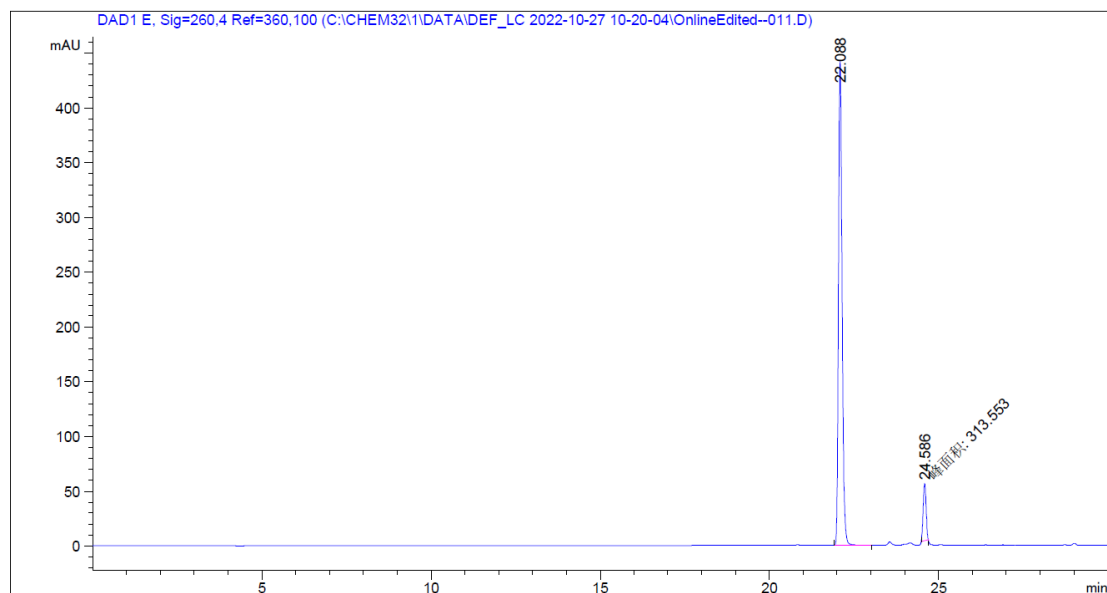

| 峰<br># | 保留时间<br>[min] | 类型 | 峰宽<br>[min] | 峰面积<br>[mAU*s] | 峰高<br>[mAU] | 峰面积<br>% |
|--------|---------------|----|-------------|----------------|-------------|----------|
| 1      | 22.088        | BB | 0.1138      | 3257.19824     | 442.89520   | 91.2188  |
| 2      | 24.586        | MM | 0.1002      | 313.55341      | 52.13104    | 8.7812   |

HPLC spectra of C3

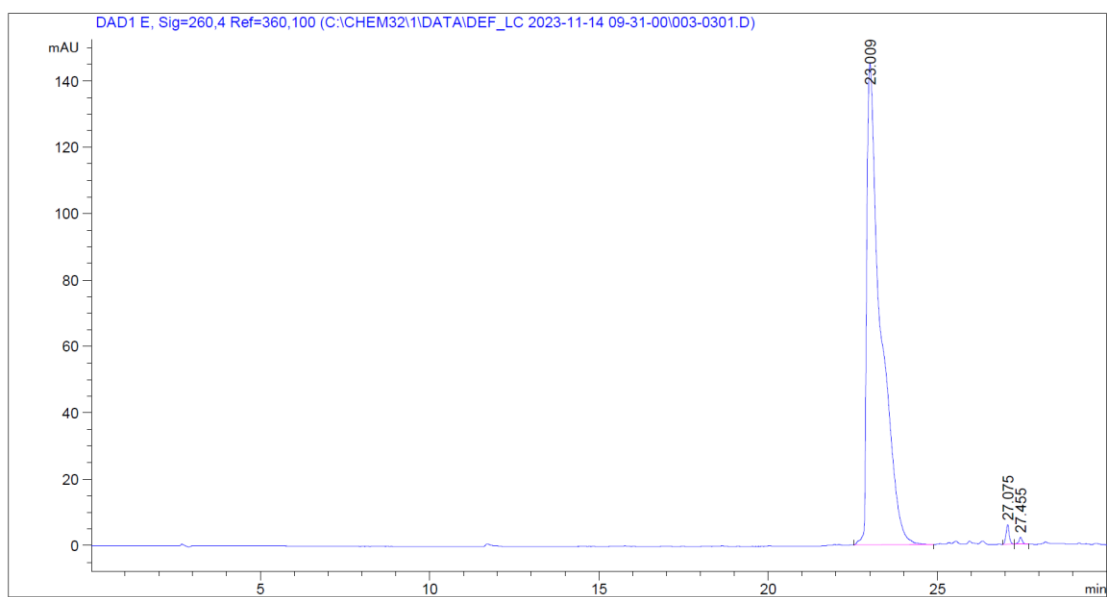

| 峰<br># | 保留时间<br>[min] | 类型 | 峰宽<br>[min] | 峰面积<br>[mAU*s] | 峰高<br>[mAU] | 峰面积<br>% |
|--------|---------------|----|-------------|----------------|-------------|----------|
| 1      | 23.009        | BB | 0.4075      | 4171.56934     | 145.06787   | 98.7272  |
| 2      | 27.075        | BB | 0.0976      | 39.35571       | 5.91382     | 0.9314   |
| 3      | 27.455        | BB | 0.1006      | 14.42609       | 2.08862     | 0.3414   |

HPLC spectra of C4

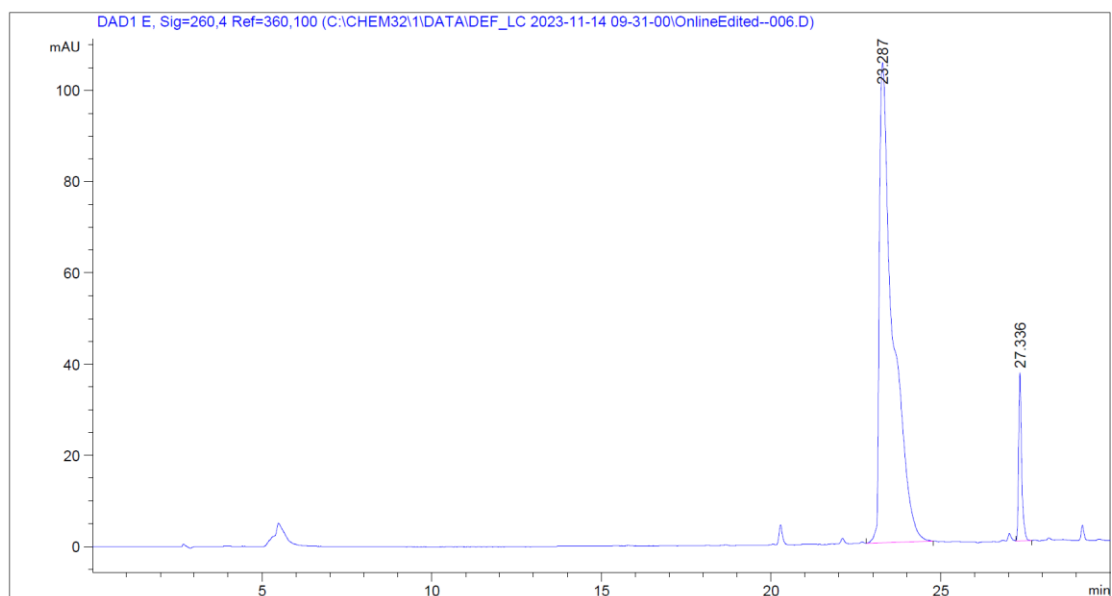

| 峰 # | 保留时间 [min] | 类型 | 峰宽 [min] | 峰面积 [mAU*s] | 峰高 [mAU]  | 峰面积 %   |
|-----|------------|----|----------|-------------|-----------|---------|
| 1   | 23.287     | BB | 0.3921   | 2922.27368  | 105.19804 | 92.9197 |
| 2   | 27.336     | VB | 0.0902   | 222.67017   | 37.00299  | 7.0803  |

HPLC spectra of C5

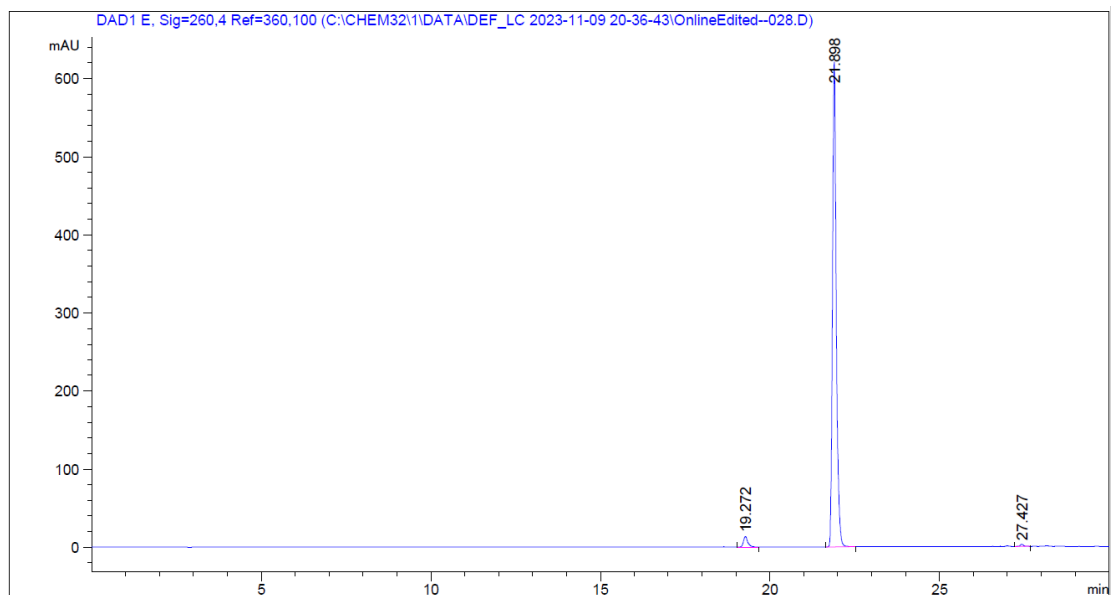

| 峰<br># | 保留时间<br>[min] | 类型 | 峰宽<br>[min] | 峰面积<br>[mAU*s] | 峰高<br>[mAU] | 峰面积<br>% |
|--------|---------------|----|-------------|----------------|-------------|----------|
| 1      | 19.272        | BB | 0.1322      | 121.71674      | 13.62400    | 2.5101   |
| 2      | 21.898        | BB | 0.1124      | 4707.26758     | 621.44769   | 97.0738  |
| 3      | 27.427        | BB | 0.1039      | 20.17986       | 2.87370     | 0.4162   |

HPLC spectra of C6

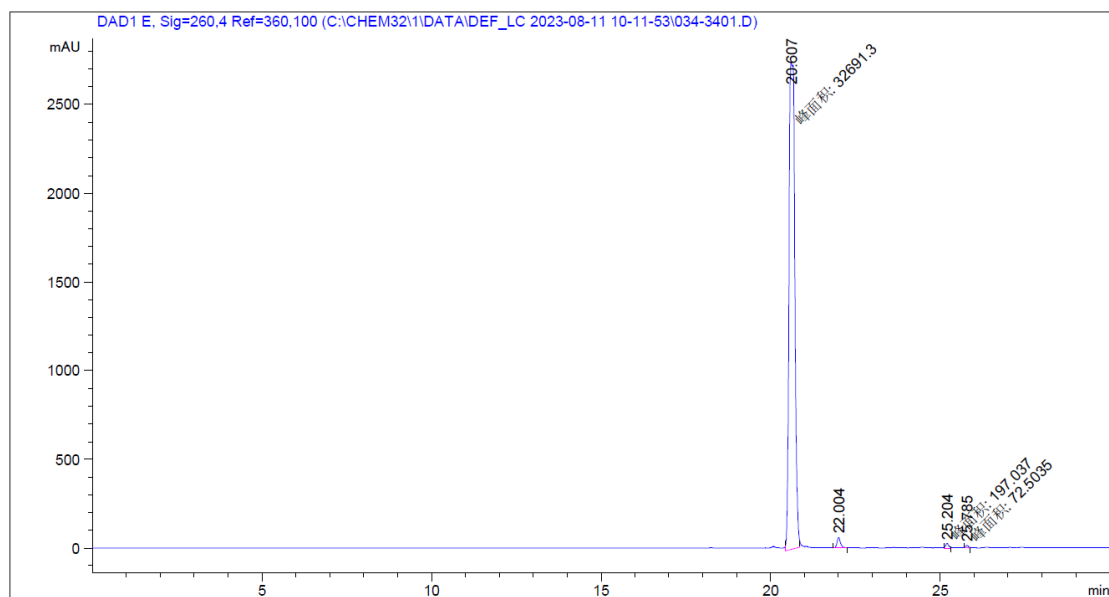

| 峰<br># | 保留时间<br>[min] | 类型 | 峰宽<br>[min] | 峰面积<br>[mAU*s] | 峰高<br>[mAU] | 峰面积<br>% |
|--------|---------------|----|-------------|----------------|-------------|----------|
| 1      | 20.607        | MM | 0.1985      | 3.26913e4      | 2744.41333  | 97.9820  |
| 2      | 22.004        | BB | 0.1037      | 403.74094      | 59.13297    | 1.2101   |
| 3      | 25.204        | MM | 0.1106      | 197.03696      | 29.68626    | 0.5906   |
| 4      | 25.785        | MM | 0.0953      | 72.50353       | 12.67864    | 0.2173   |
